# Supplementary material for: Iridium-catalyzed reductive β-alkylation of (iso)quinoline derivatives by an in situ enone-trapping strategy
Source: Royal Society of Chemistry journal article supplement (doi:10.1039/d4ob00666f), 2024-01-01
Supplement: d4ob00666f1.pdf [file d4ob00666f1.pdf]

# Supporting Information

## Iridium-Catalysed Reductive Beta-alkylation of (Iso)quinoline Derivatives by an In-situ Enone-trapping Strategy

Yanping Sun,<sup>†</sup> Jianjie Chen and Min Zhang<sup>\*,†</sup>

State Key Laboratory of Pulp and Paper Engineering and School of Chemistry and Chemical Engineering, South  
China University of Technology, Guangzhou 510641, People's Republic of China.

### Corresponding Authors

\*Email: minzhang@scut.edu.cn

### Table of Contents

|                                           |         |
|-------------------------------------------|---------|
| General information                       | S2      |
| Optimization of reaction conditions       | S3      |
| Control experiments                       | S3-S5   |
| The Synthetic Utility                     | S5-S6   |
| Analytical data of the obtained compounds | S6-S17  |
| NMR spectra of obtained compounds         | S18-S52 |
| References                                | S53     |

## General information

All the obtained products were characterized by melting points (m.p.),  $^1\text{H}$  NMR,  $^{13}\text{C}$  NMR and mass spectra (MS). Melting points were measured on an Electrothermal SGW-X4 microscopy digital melting point apparatus and are uncorrected.  $^1\text{H}$ -NMR and  $^{13}\text{C}$ -NMR spectra were obtained on Bruker-400 or Bruker-500 and referenced to 7.26 ppm for chloroform solvent or 2.54 ppm for dimethyl sulfoxide solvent with TMS as internal standard (0 ppm). Chemical shifts were reported in parts per million (ppm,  $\delta$ ) downfield from tetramethylsilane. Proton coupling patterns are described as singlet (s), doublet (d), triplet (t), multiplet (m); TLC was performed using commercially prepared 600 mesh silica gel plates (GF254), and visualization was effected at 254 nm. Unless otherwise stated, all the reagents were purchased from commercial sources, used without further purification. Moreover, the N-heteroarene cations are named as  $\text{A}_x$  (Synthesised according to literature)<sup>1</sup>, the chloralkane are named as  $\text{B}_x$ , and the obtained final products are named as  $\text{C}_x$ .

successful substrates:

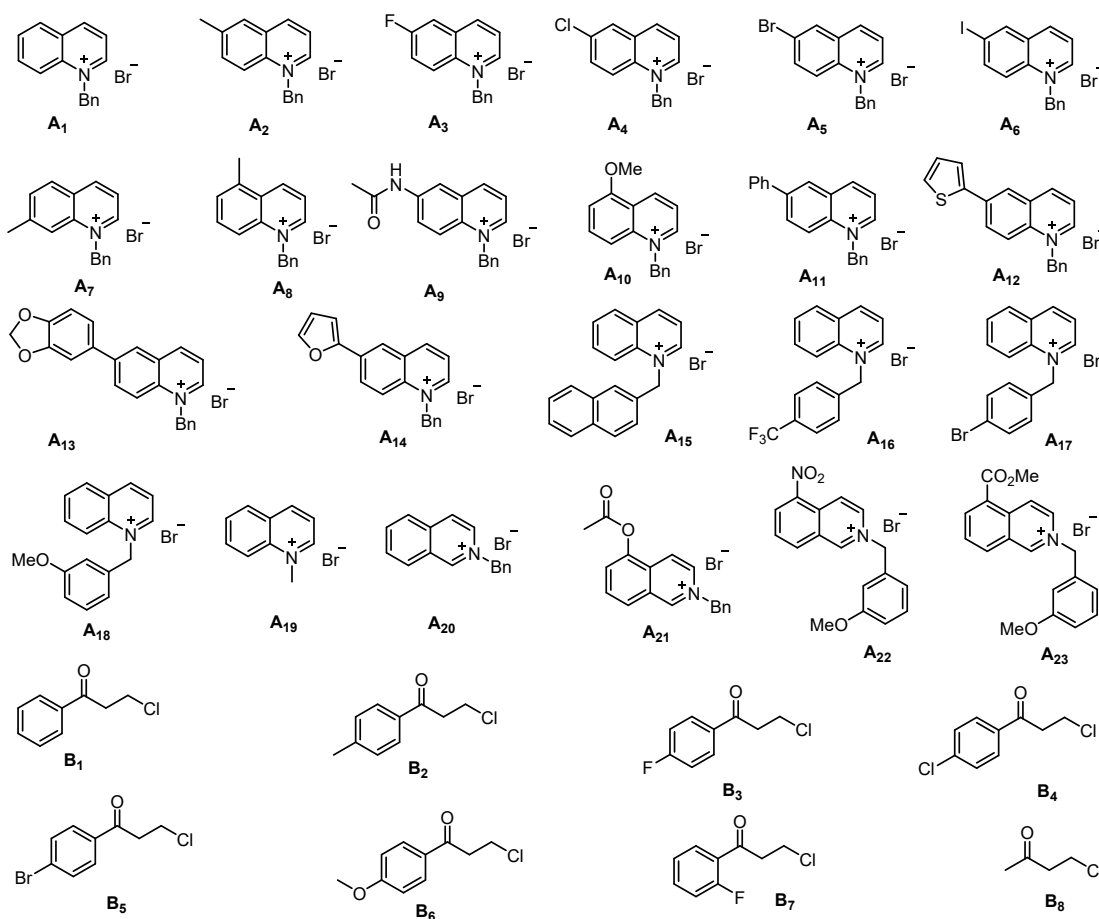

unsuccessful substrates:

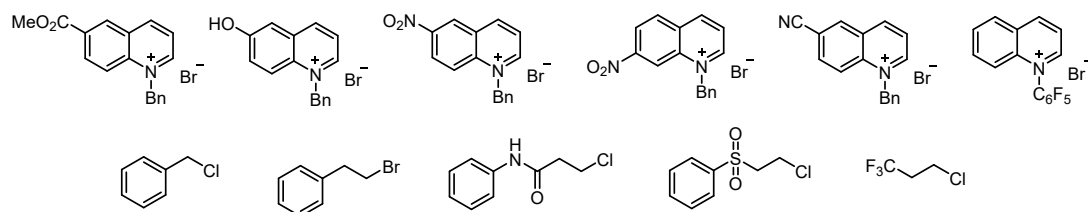

**Scheme S1.** Substrates employed for the reaction

**Typical procedure for the synthesis of C**

(Iso)quinolinium salts (0.2mmol), chloroalkyl ketone (0.28 mmol), [IrCp\*Cl<sub>2</sub>]<sub>2</sub> (0.002 mmol), Mg(OMe)<sub>2</sub> (1.5 eq), (CH<sub>2</sub>O)<sub>n</sub> (3 eq) and KI (2 eq) were added to a 50 mL Schlenk tube. After charging N<sub>2</sub> for three times, 1mL methanol was added and the tube was then closed. The resulting mixture which was stirred at 65 °C for 24 h. After cooling down to room temperature, the reaction mixture was concentrated under vacuum, and nitromethane (0.2 mmol) was added as the internal standard to calculate <sup>1</sup>H NMR yield. (Some products were isolated by preparative TLC on silica)

**Table S1. Optimization of reaction conditions<sup>a</sup>**

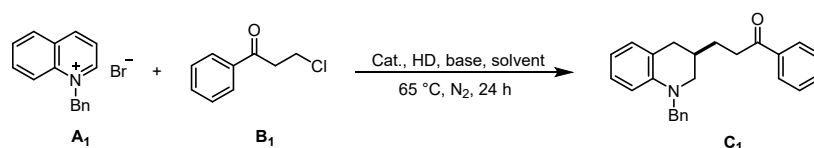

| Entry | catalyst                                  | base                            | solvent           | Yield(%) <sup>b</sup> |
|-------|-------------------------------------------|---------------------------------|-------------------|-----------------------|
| 1     | [IrCp*Cl <sub>2</sub> ] <sub>2</sub>      | Mg(OMe) <sub>2</sub>            | MeOH              | 56%                   |
| 2     | [Ir(cod)Cl <sub>2</sub> ] <sub>2</sub>    | Mg(OMe) <sub>2</sub>            | MeOH              | trace                 |
| 3     | Ru(p-cymene) <sub>2</sub> Cl <sub>2</sub> | Mg(OMe) <sub>2</sub>            | MeOH              | 43%                   |
| 4     | RuCl <sub>3</sub> ·H <sub>2</sub> O       | Mg(OMe) <sub>2</sub>            | MeOH              | trace                 |
| 5     | RuCl <sub>2</sub> PPh <sub>3</sub>        | Mg(OMe) <sub>2</sub>            | MeOH              | trace                 |
| 6     | RuCp*(cod)Cl                              | Mg(OMe) <sub>2</sub>            | MeOH              | trace                 |
| 5     | [RhCp*Cl <sub>2</sub> ] <sub>2</sub>      | Mg(OMe) <sub>2</sub>            | MeOH              | 39%                   |
| 7     | [IrCp*Cl <sub>2</sub> ] <sub>2</sub>      | NaOMe                           | MeOH              | trace                 |
| 8     | [IrCp*Cl <sub>2</sub> ] <sub>2</sub>      | Cs <sub>2</sub> CO <sub>3</sub> | MeOH              | trace                 |
| 9     | [IrCp*Cl <sub>2</sub> ] <sub>2</sub>      | Mg(EtO) <sub>2</sub>            | MeOH              | 20%                   |
| 10    | [IrCp*Cl <sub>2</sub> ] <sub>2</sub>      | K <sub>3</sub> PO <sub>4</sub>  | MeOH              | trace                 |
| 11    | [IrCp*Cl <sub>2</sub> ] <sub>2</sub>      | LiOMe                           | MeOH              | trace                 |
| 12    | [IrCp*Cl <sub>2</sub> ] <sub>2</sub>      | Mg(OMe) <sub>2</sub>            | EtOH              | 30%                   |
| 13    | [IrCp*Cl <sub>2</sub> ] <sub>2</sub>      | Mg(OMe) <sub>2</sub>            | <sup>i</sup> PrOH | trace                 |
| 14    | [Ir(cod)Cl <sub>2</sub> ] <sub>2</sub>    | Mg(OMe) <sub>2</sub>            | MeOH              | (65, 64) <sup>c</sup> |
| 15    | [Ir(cod)Cl <sub>2</sub> ] <sub>2</sub>    | Mg(OMe) <sub>2</sub>            | MeOH              | 73 <sup>d</sup>       |
| 16    | [Ir(cod)Cl <sub>2</sub> ] <sub>2</sub>    | Mg(OMe) <sub>2</sub>            | MeOH              | 46 <sup>e</sup>       |

<sup>a</sup> Conditions: unless otherwise stated, all the reactions were performed with **A**<sub>1</sub> (0.20 mmol), **B**<sub>1</sub> (0.24 mmol), catalyst (1 mol %), (HCHO)<sub>n</sub> (2.0 equiv), base (1.5 equiv), KI (2.0 equiv), MeOH (1.0 mL) at 65 °C for 24 h under N<sub>2</sub> protection. <sup>b</sup> NMR yield using nitromethane as an internal standard. <sup>c</sup> Yield obtained with 3.0 and 4.0 equiv. (HCHO)<sub>n</sub> respectively. <sup>d</sup> Yield obtained with 3.0 equiv. (HCHO)<sub>n</sub> and 0.28 mmol **B**<sub>1</sub>. <sup>e</sup> Yield obtained with the absence of KI.

**Control experiments**

**Intermediate capture**

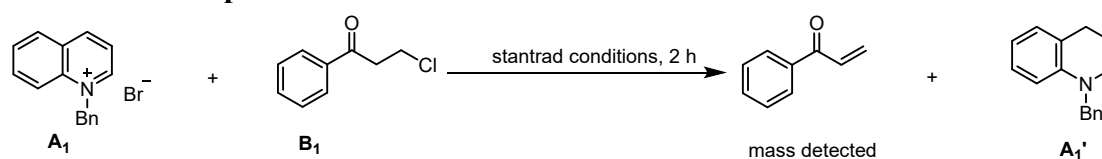

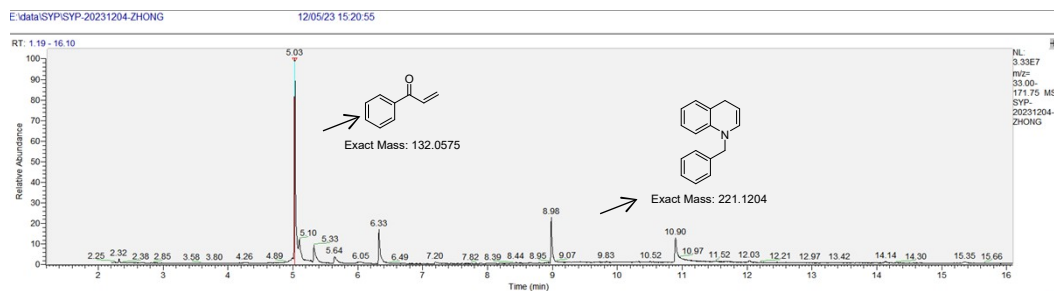

Fig

re S2 GC-MS of the product  $C_1$  generated by interruption test of the model reaction at 2 h

### Deuterium-labelling studies

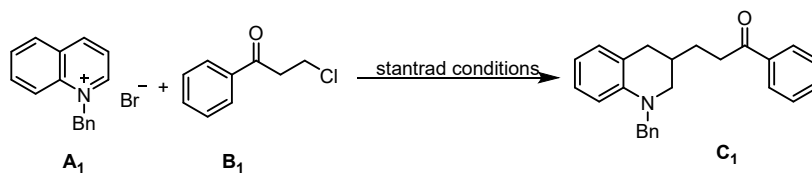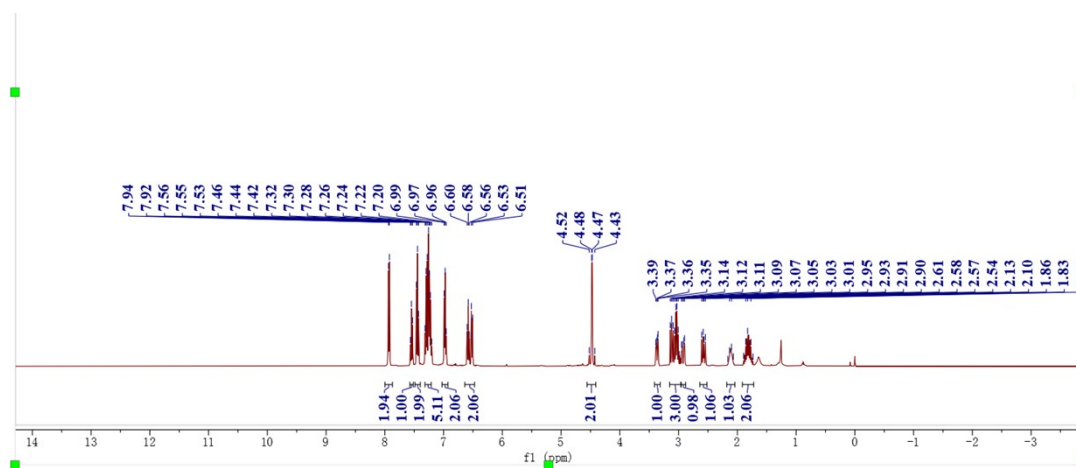

Figure S3  $^1\text{H-NMR}$  spectrum of  $C_1$

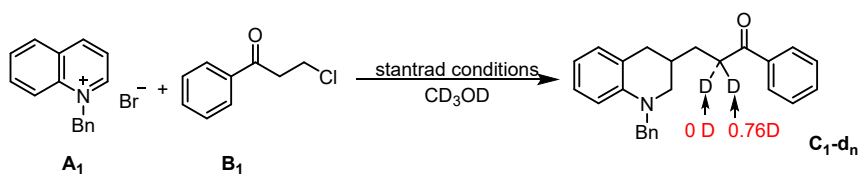

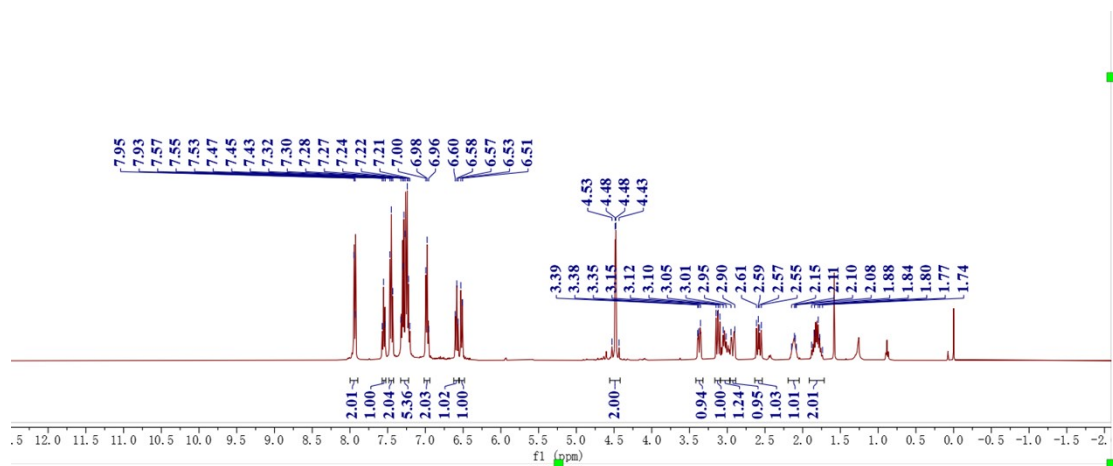

Figure S4  $^1\text{H-NMR}$  spectrum of  $\text{C}_1$  with  $\text{CD}_3\text{OD}$  as solvent

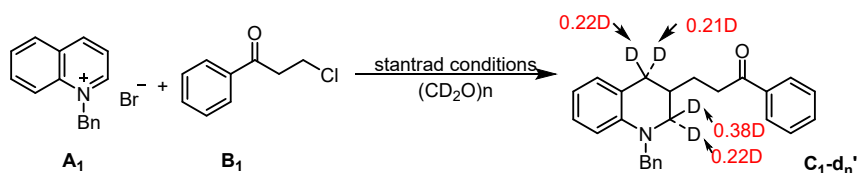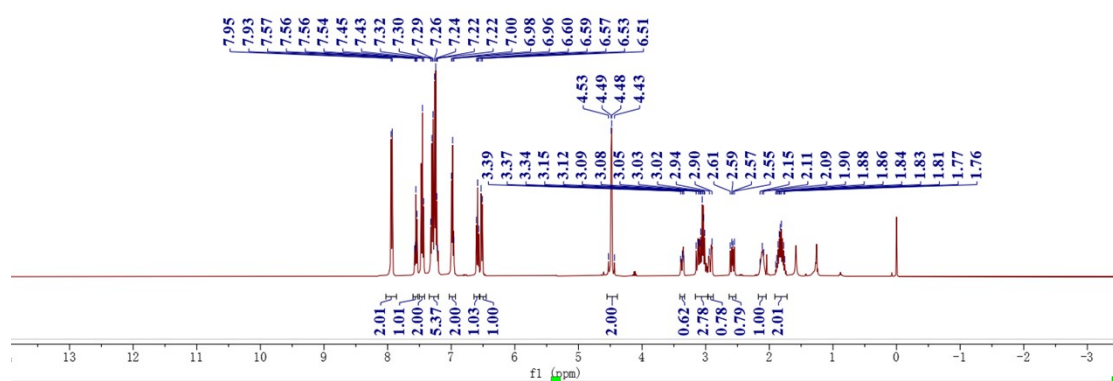

Figure S5  $^1\text{H-NMR}$  spectrum of  $\text{C}_1$  with  $(\text{CD}_2\text{O})_n$

## The Synthetic Utility

### Synthesis of camphor analogue $\text{C}_{31}$

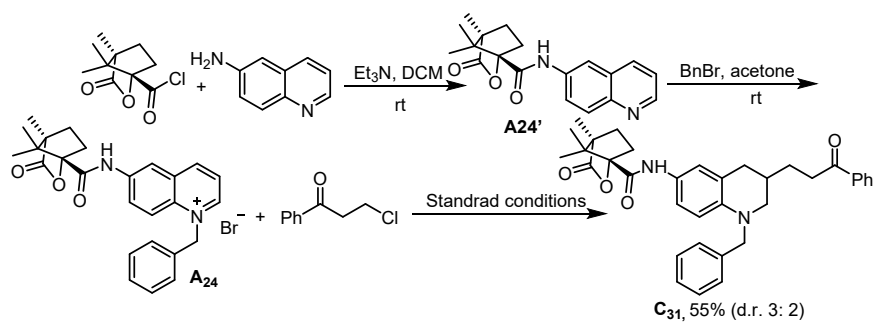

Scheme S2. Synthesis of compound  $\text{C}_{31}$

To a solution of 6-aminoquinoline (10 mmol, 1.44 g) in anhydrous  $\text{CH}_2\text{Cl}_2$  was added triethylamine (12 mmol, 1.21 g) and (-)-(1S,4R)-Camphanoyl chloride (11 mmol, 2.38 g) at 0 °C. The reaction mixture was stirred at room temperature until the reaction was completed (monitored by TLC). Water (50 mL) was added to the mixture and extracted with  $\text{CH}_2\text{Cl}_2$  (30 mL). The organic phase was dried over anhydrous sodium sulfate, and concentrated under reduced pressure. The residue was purified by flash chromatography on silica gel to afford  $\text{A}_{24}'$ .  $\text{A}_{24}'$  (3 mmol), benzyl bromide (6 mmol) and acetone (5 mL) were introduced in a flask (50 mL). And it was stirred at room temperature for 24 h. Then, the solvent was removed. The reaction mixture was washed with small amount of diethyl ether and finally dried under vacuum to get  $\text{A}_{24}$  (The product is a known compound, consistent with the literature reports)<sup>2</sup>.

$\text{A}_{24}$  (0.2mmol), chloroalkyl ketone (0.28 mmol),  $[\text{IrCp}^*\text{Cl}_2]_2$  (0.002 mmol),  $\text{Mg}(\text{OMe})_2$  (1.5 eq),  $(\text{CH}_2\text{O})_n$  (3 eq) and KI (2 eq) were added to a 50 mL Schlenk tube. After charging  $\text{N}_2$  for three times, 1mL methanol was added and the tube was then closed, which was stirred at 65 °C for 24 h. After cooling down to the room temperature, the reaction mixture was concentrated under vacuum and purified by preparative TLC on silica to obtain product  $\text{C}_{31}$  (55% isolated yield).

### The transformation of $\text{C}_1$ Debenzylation and reduction

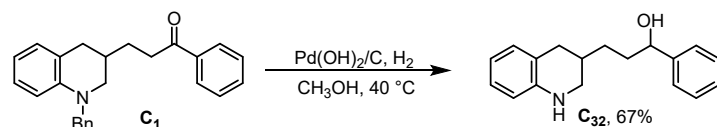

**Scheme S3.** Synthesis of compound  $\text{C}_{32}$

Under  $\text{N}_2$  atmosphere,  $\text{Pd}(\text{OH})_2/\text{C}$  (10 mol%),  $\text{C}_1$  (0.2 mmol),  $\text{HCOOH}$  (0.6 mmol) were added to a 50 mL Schlenk tube. The tube was closed and stirred at 40 °C for 24 h. After cooling down to the room temperature, the mixture was filtered through a funnel with filter paper and concentrated filtrate. Finally, the residue was purified by preparative TLC on silica to give  $\text{C}_{32}$  as liquid (65% isolated yield).

### Wittig Reaction

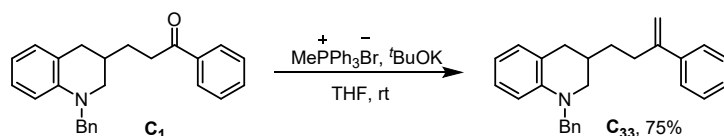

**Scheme S4.** Synthesis of compound  $\text{C}_{33}$

Methyltriphenylphosphonium bromide (0.3 mmol) was introduced into a dry Schlenk tube. Then, the tube was charged with N<sub>2</sub> for three times, and <sup>t</sup>BuOK in THF (1M) and THF (0.5 mL) were added to the tube. The reaction mixture was stirred at 0 °C, and C<sub>1</sub> in 0.5 Ml THF was added dropwise. The resulting mixture was warmed to room temperature and stirred overnight. Upon completion, the reaction mixture was filtered through a funnel with filter paper and concentrated filtrate. Finally, the residue was purified by preparative TLC on silica to give C<sub>33</sub> as liquid (75% yield).

### Analytic data of the obtained compounds

- (1) 3-(1-benzyl-1,2,3,4-tetrahydroquinolin-3-yl)-1-phenylpropan-1-one (C<sub>1</sub>)

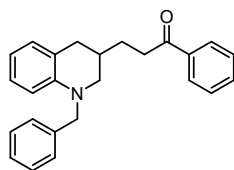

Brown solid; M.p. 124-126 °C, (73% <sup>1</sup>H NMR yield); <sup>1</sup>H NMR (400 MHz, Chloroform-*d*) δ 7.93 (d, *J* = 8.0 Hz, 2H), 7.55 (t, *J* = 7.4 Hz, 1H), 7.44 (t, *J* = 7.7 Hz, 2H), 7.32 – 7.20 (m, 5H), 6.97 (t, *J* = 7.0 Hz, 2H), 6.64 – 6.47 (m, 2H), 4.52-4.43 (m, 2H), 3.39-3.35 (m, 1H), 3.15 – 2.96 (m, 3H), 2.95-2.90 (m, 1H), 2.57 (dd, *J* = 16.0, 12.0 Hz, 1H), 2.16 – 2.07 (m, 1H), 1.89 – 1.73 (m, 2H). <sup>13</sup>C NMR (101 MHz, CDCl<sub>3</sub>) δ 199.0, 145.2, 138.8, 136.8, 133.0, 129.2, 128.6, 128.6, 128.0, 127.2, 126.8, 126.6, 121.2, 116.1, 110.9, 55.2, 54.9, 35.8, 34.3, 32.0, 27.8. HRMS (ESI): Calcd. for C<sub>25</sub>H<sub>26</sub>NO<sup>+</sup> [M+H]<sup>+</sup>: 356.2009; found: 356.2004.

- (2) 3-(1-benzyl-6-methyl-1,2,3,4-tetrahydroquinolin-3-yl)-1-phenylpropan-1-one (C<sub>2</sub>)

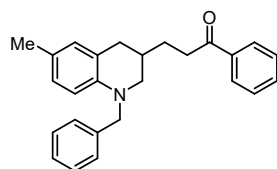

Yellow solid; M.p. 78-82 °C, (57% <sup>1</sup>H NMR yield); <sup>1</sup>H NMR (400 MHz, Chloroform-*d*) δ 7.93 (d, *J* = 8.0 Hz, 2H), 7.58 (t, *J* = 7.4 Hz, 1H), 7.48 (t, *J* = 7.8 Hz, 2H), 7.31 – 7.20 (m, 5H), 6.81-6.77 (m, 2H), 6.44(d, *J* = 8.0 Hz, 1H), 4.49 – 4.39 (m, 2H), 3.36 – 3.31 (m, 1H), 3.10 – 3.00 (m, 3H), 2.91-2.86 (m, 1H), 2.58 – 2.52 (m, 1H), 2.19 (s, 3H), 2.41 – 2.05 (m, 1H), 1.89 – 1.71 (m, 2H). <sup>13</sup>C NMR (101 MHz, CDCl<sub>3</sub>) δ 199.9, 143.1, 139.1, 136.9, 133.0, 130.0, 128.6, 128.5, 128.0, 127.6, 126.7, 126.6, 125.2, 121.2, 111.0, 55.4, 54.9, 35.9, 34.3, 32.2, 27.8, 20.2. HRMS (ESI): Calcd. for C<sub>26</sub>H<sub>28</sub>NO<sup>+</sup> [M+H]<sup>+</sup>: 370.2165; found: 370.2161.

- (3) 3-(1-benzyl-6-fluoro-1,2,3,4-tetrahydroquinolin-3-yl)-1-phenylpropan-1-one (C<sub>3</sub>)

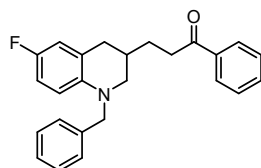

Brown oily liquid, (65% <sup>1</sup>H NMR yield); <sup>1</sup>H NMR (400 MHz, Chloroform-*d*) δ 7.95-7.92 (m, 2H),

7.55 (t,  $J = 7.4$  Hz, 1H), 7.45 (t,  $J = 7.8$  Hz, 2H), 7.322 – 7.21 (m, 5H), 6.72 – 6.65 (m, 2H), 6.40 (dd,  $J = 9.0, 4.6$  Hz, 1H), 4.48 – 4.38 (m, 2H), 3.36 – 3.32 (m, 1H), 3.11 – 2.86 (m, 3H), 2.92 – 2.86 (m, 1H), 2.59 – 2.52 (m, 1H), 2.14 – 2.06 (m, 1H), 1.89 – 1.75 (m, 2H).  $^{13}\text{C}$  NMR (101 MHz,  $\text{CDCl}_3$ )  $\delta$  199.8, 156.0, 153.6, 141.7 (d,  $J = 2.0$  Hz), 138.7, 136.8, 133.0, 128.6, 128.0, 126.9, 126.6, 122.7 (d,  $J = 6.1$  Hz), 115.6 (d,  $J = 22.2$  Hz), 113.2 (d,  $J = 21.2$  Hz), 111.6 (d,  $J = 8.1$  Hz), 55.7, 54.9, 35.8, 34.4, 32.0, 27.6.  $^{19}\text{F}$  NMR (376 MHz, Chloroform- $d$ )  $\delta$  -129.74. HRMS (ESI): Calcd. for  $\text{C}_{25}\text{H}_{25}\text{NOF}^+$   $[\text{M}+\text{H}]^+$ : 374.1915; found: 374.1912.

(4) 3-(4-benzyl-7-chloro-1,2,3,4-tetrahydronaphthalen-2-yl)-1-phenylpropan-1-one ( $\text{C}_4$ )

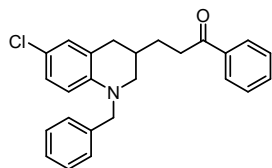

Brown oily liquid, (48%  $^1\text{H}$  NMR yield);  $^1\text{H}$  NMR (400 MHz, Chloroform- $d$ )  $\delta$  7.94 – 7.92 (m, 2H), 7.55 (t,  $J = 8.0$  Hz, 1H), 7.30 (t,  $J = 7.8$  Hz, 2H), 7.32 – 7.20 (m, 5H), 6.93 (d,  $J = 2.6$  Hz, 1H), 6.94 – 6.88 (m, 2H), 6.40 (d,  $J = 8.8$  Hz, 1H), 4.50 – 4.39 (m, 2H), 3.39 – 3.34 (m, 1H), 3.14 – 2.96 (m, 3H), 2.90 – 2.85 (m, 1H), 2.57 – 2.50 (m, 1H), 2.13 – 2.05 (m, 1H), 1.89 – 1.73 (m, 2H).  $^{13}\text{C}$  NMR (126 MHz,  $\text{CDCl}_3$ )  $\delta$  199.7, 143.7, 138.2, 136.6, 133.1, 128.8, 128.6, 128.6, 128.0, 126.9, 126.8, 126.5, 122.8, 120.4, 111.9, 55.2, 54.8, 35.7, 34.1, 31.7, 27.5. HRMS (ESI): Calcd. for  $\text{C}_{25}\text{H}_{25}\text{NOCl}^+$   $[\text{M}+\text{H}]^+$ : 390.1619; found: 390.1615.

(5) 3-(1-benzyl-6-bromo-1,2,3,4-tetrahydroquinolin-3-yl)-1-phenylpropan-1-one ( $\text{C}_5$ )

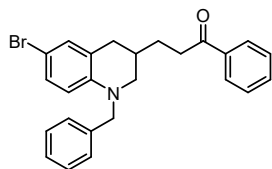

Red oily liquid, (31%  $^1\text{H}$  NMR yield);  $^1\text{H}$  NMR (400 MHz, Chloroform- $d$ )  $\delta$  7.94 – 7.92 (m, 2H), 7.56 (t,  $J = 7.4$  Hz, 1H), 7.45 (t,  $J = 7.8$  Hz, 2H), 7.30 (t,  $J = 7.2$  Hz, 2H), 7.24 – 7.20 (m, 3H), 7.07 – 7.01 (m, 2H), 6.36 (d,  $J = 8.6$  Hz, 1H), 4.50 – 4.39 (m, 2H), 3.39 – 3.35 (m, 1H), 3.14 – 3.00 (m, 3H), 2.91 – 2.85 (m, 1H), 2.57 – 2.51 (m, 1H), 2.13 – 2.05 (m, 1H), 1.89 – 1.72 (m, 2H).  $^{13}\text{C}$  NMR (126 MHz,  $\text{CDCl}_3$ )  $\delta$  199.7, 144.2, 138.1, 136.7, 133.1, 131.5, 129.7, 128.7, 128.6, 128.0, 126.9, 126.5, 123.3, 112.4, 107.5, 55.1, 54.8, 35.7, 34.0, 31.7, 27.5. HRMS (ESI): Calcd. for  $\text{C}_{25}\text{H}_{25}\text{NOBr}^+$   $[\text{M}+\text{H}]^+$ : 434.1114; found: 434.1109.

(6) 3-(1-benzyl-6-iodo-1,2,3,4-tetrahydroquinolin-3-yl)-1-phenylpropan-1-one ( $\text{C}_6$ )

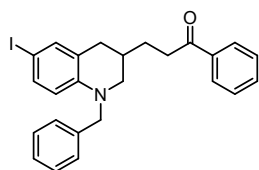

Yellow oily liquid, (20%  $^1\text{H}$  NMR yield);  $^1\text{H}$  NMR (400 MHz, Chloroform- $d$ )  $\delta$  7.94 – 7.92 (m, 2H), 7.56 (t,  $J = 7.4$  Hz, 1H), 7.46 (t,  $J = 7.8$  Hz, 2H), 7.32 – 7.19 (m, 7H), 6.27 (d,  $J = 8.6$  Hz, 1H), 4.50 –



4.40 (m, 2H), 3.40 – 3.36 (m, 1H), 3.15 – 2.96 (m, 3H), 2.90 – 2.84 (m, 1H), 2.56 – 2.50 (m, 1H), 2.14 – 2.04 (m, 1H), 1.89 – 1.72 (m, 2H). <sup>13</sup>C NMR (126 MHz, CDCl<sub>3</sub>) δ 199.7, 144.8, 138.1, 137.3, 136.8, 135.7, 133.1, 128.7, 128.6, 128.0, 127.0, 126.4, 123.9, 113.0, 54.9, 54.8, 35.7, 33.9, 31.6, 27.5. HRMS (ESI): Calcd. for C<sub>25</sub>H<sub>25</sub>NOI<sup>+</sup> [M+H]<sup>+</sup>: 482.0975; found: 482.0971.

(7) 3-(1-benzyl-7-methyl-1,2,3,4-tetrahydroquinolin-3-yl)-1-phenylpropan-1-one (C<sub>7</sub>)

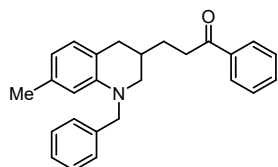

Yellow solid; M.p. 104-107 °C, (71% <sup>1</sup>H NMR yield); <sup>1</sup>H NMR (400 MHz, Chloroform-*d*) δ 7.93 – 7.90 (m, 2H), 7.53 (t, *J* = 7.4 Hz, 1H), 7.43 (t, *J* = 7.6 Hz, 2H), 7.32 – 7.19 (m, 5H), 6.87 (d, *J* = 7.4 Hz, 1H), 6.41 (d, *J* = 7.6 Hz, 1H), 6.38 (s, 1H), 4.50 – 4.41 (m, 2H), 3.34 – 3.30 (m, 1H), 3.09 – 2.93 (m, 3H), 2.91 – 2.85 (m, 1H), 2.55-2.49 (m, 1H), 2.17 (s, 3H), 2.10 – 2.04 (m, 1H), 1.87 – 1.71 (m, 2H). <sup>13</sup>C NMR (101 MHz, CDCl<sub>3</sub>) δ 199.8, 145.2, 138.9, 136.9, 136.8, 132.9, 129.1, 128.5, 128.0, 126.7, 126.7, 118.3, 116.9, 111.5, 55.1, 54.7, 35.8, 34.0, 32.1, 27.7, 21.5. HRMS (ESI): Calcd. for C<sub>26</sub>H<sub>28</sub>NO<sup>+</sup> [M+H]<sup>+</sup>: 370.2165; found: 370.2163.

(8) 3-(1-benzyl-5-methyl-1,2,3,4-tetrahydroquinolin-3-yl)-1-phenylpropan-1-one (C<sub>8</sub>)

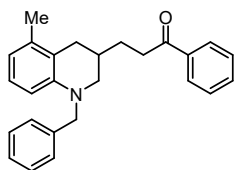

Off-white solid; M.p. 117-119 °C, (60% <sup>1</sup>H NMR yield); <sup>1</sup>H NMR (400 MHz, Chloroform-*d*) δ 7.95 – 7.93 (m, 2H), 7.55 (t, *J* = 7.4 Hz, 1H), 7.45 (t, *J* = 7.8 Hz, 2H), 7.31 – 7.20 (m, 5H), 6.89 (t, *J* = 8.0 Hz, 1H), 6.51 (d, *J* = 7.4 Hz, 1H), 6.42 (d, *J* = 8.2 Hz, 1H), 4.52 – 4.42 (m, 2H), 3.36 – 3.31 (m, 1H), 3.12 – 2.99 (m, 3H), 2.91 – 2.85 (m, 1H), 2.41 – 2.34 (m, 1H), 2.21 (s, 3H), 2.16 – 2.08 (m, 1H), 1.84 (q, *J* = 7.4 Hz, 2H). <sup>13</sup>C NMR (126 MHz, CDCl<sub>3</sub>) δ 199.9, 145.5, 139.0, 136.9, 136.6, 133.0, 128.6, 128.5, 128.0, 126.7, 126.6, 126.4, 119.9, 118.3, 109.4, 55.9, 54.5, 35.9, 32.0, 31.4, 28.2, 19.9. HRMS (ESI): Calcd. for C<sub>26</sub>H<sub>28</sub>NO<sup>+</sup> [M+H]<sup>+</sup>: 370.2165; found: 370.2160

(9) (R)-N-(1-benzyl-3-(3-oxo-3-phenylpropyl)-1,2,3,4-tetrahydroquinolin-6-yl)acetamide (C<sub>9</sub>)

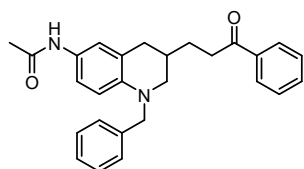

Red oily liquid, (59% <sup>1</sup>H NMR yield); <sup>1</sup>H NMR (400 MHz, Chloroform-*d*) δ 7.92 – 7.89 (m, 3H), 7.52 (t, *J* = 7.4 Hz, 1H), 7.42 (t, *J* = 7.6 Hz, 2H), 7.28 – 7.19 (m, 6H), 6.97 (dd, *J* = 8.6, 2.6 Hz, 1H), 6.40 (d, *J* = 8.8 Hz, 1H), 4.44 – 4.34 (m, 2H), 3.30 – 3.27 (m, 1H), 3.06 – 2.95 (m, 3H), 2.84 – 2.79 (m, 1H), 2.50 – 2.44 (m, 1H), 2.04 (s, 3H), 2.06 – 2.00 (m, 1H), 1.83 – 1.68 (m, 2H). <sup>13</sup>C NMR (101 MHz, CDCl<sub>3</sub>) δ 199.9, 168.4, 142.3, 138.6, 136.6, 132.9, 128.5, 128.4, 127.8, 127.1, 126.7, 126.5, 122.4,

121.3, 120.1, 110.7, 55.1, 54.7, 35.8, 34.2, 31.9, 27.5, 23.9. HRMS (ESI): Calcd. for  $C_{27}H_{29}N_2O_2^+$   $[M+H]^+$ : 413.2224; found: 413.2219.

(10) 3-(1-benzyl-5-methoxy-1,2,3,4-tetrahydroquinolin-3-yl)-1-phenylpropan-1-one ( $C_{10}$ )

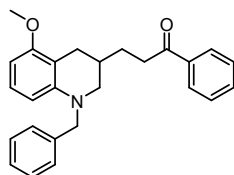

White solid; M.p. 78-80 °C, (52%  $^1H$  NMR yield);  $^1H$  NMR (400 MHz, Chloroform-*d*)  $\delta$  7.95 – 7.92 (m, 2H), 7.54 (t,  $J = 7.4$  Hz, 1H), 7.44 (t,  $J = 7.6$  Hz, 2H), 7.31 – 7.19 (m, 5H), 6.94 (t,  $J = 8.2$  Hz, 1H), 6.24 (d,  $J = 8.0$  Hz, 2H), 4.52 – 4.42 (m, 2H), 3.79 (s, 3H), 3.32 – 3.28 (m, 1H), 3.14 – 2.97 (m, 4H), 2.34 – 2.28 (m, 1H), 2.07 – 2.02 (m, 1H), 1.90 – 1.72 (m, 2H).  $^{13}C$  NMR (126 MHz,  $CDCl_3$ )  $\delta$  200.0, 157.4, 146.3, 139.0, 136.7, 132.9, 128.5, 128.5, 128.0, 126.9, 126.7, 126.6, 109.1, 104.7, 98.7, 55.6, 55.3, 54.6, 35.9, 31.5, 28.1, 27.4. HRMS (ESI): Calcd. for  $C_{26}H_{28}NO_2^+$   $[M+H]^+$ : 386.2115; found: 386.2109.

(11) 3-(1-benzyl-6-phenyl-1,2,3,4-tetrahydroquinolin-3-yl)-1-phenylpropan-1-one ( $C_{11}$ )

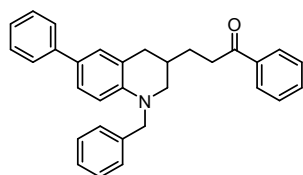

Yellow solid; M.p. 86-88 °C, (63%  $^1H$  NMR yield);  $^1H$  NMR (400 MHz, Chloroform-*d*)  $\delta$  7.93 (d,  $J = 7.2$  Hz, 2H), 7.55 – 7.50 (m, 3H), 7.44 (t,  $J = 7.6$  Hz, 2H), 7.37 – 7.19 (m, 10H), 6.59 (d,  $J = 8.4$  Hz, 1H), 4.56 – 4.46 (m, 2H), 3.42 – 3.38 (m, 1H), 3.18 – 2.97 (m, 4H), 2.67 – 2.60 (m, 1H), 2.18 – 2.10 (m, 1H), 1.92 – 1.76 (m, 2H).  $^{13}C$  NMR (126 MHz,  $CDCl_3$ )  $\delta$  199.8, 144.7, 141.2, 138.6, 136.8, 133.0, 128.8, 128.6, 128.4, 128.5, 128.0, 127.8, 126.7, 126.6, 126.1, 125.8, 125.8, 121.4, 111.1, 55.1, 55.0, 35.8, 34.4, 32.0, 27.7. HRMS (ESI): Calcd. for  $C_{31}H_{30}NO^+$   $[M+H]^+$ : 432.2322; found: 432.2319.

(12) 3-(1-benzyl-6-(thiophen-2-yl)-1,2,3,4-tetrahydroquinolin-3-yl)-1-phenylpropan-1-one ( $C_{12}$ )

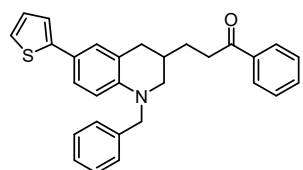

Yellow solid; M.p. 100-102 °C, (44%  $^1H$  NMR yield);  $^1H$  NMR (400 MHz, Chloroform-*d*)  $\delta$  7.95 – 7.93 (m, 2H), 7.56 (t,  $J = 7.4$  Hz, 1H), 7.45 (t,  $J = 7.8$  Hz, 2H), 7.33 – 7.22 (m, 7H), 7.11 – 7.08 (m, 2H), 7.00 – 6.98 (m, 1H), 6.51 (d,  $J = 8.6$  Hz, 1H), 4.5 – 4.46 (m, 2H), 3.42 – 3.38 (m, 1H), 3.18 – 2.94 (m, 4H), 2.64 – 2.57 (m, 1H), 2.17 – 2.09 (m, 1H), 1.92 – 1.75 (m, 2H).  $^{13}C$  NMR (126 MHz,  $CDCl_3$ )  $\delta$  199.8, 145.3, 144.8, 138.4, 136.8, 133.1, 128.7, 128.6, 128.0, 127.7, 127.0, 126.9, 126.6, 125.1, 122.6, 122.5, 121.4, 120.6, 111.0, 55.1, 55.0, 35.8, 34.3, 31.9, 27.7. HRMS (ESI): Calcd. for  $C_{29}H_{28}NOS^+$   $[M+H]^+$ : 438.1886; found: 438.1881.

(13) 3-(6-(benzo[d][1,3]dioxol-5-yl)-1-benzyl-1,2,3,4-tetrahydroquinolin-3-yl)-1-phenylpropan-1-one (C<sub>13</sub>)

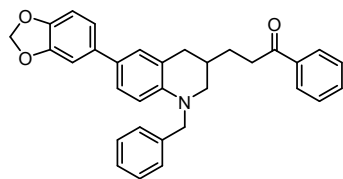

Brown oily liquid, (32% <sup>1</sup>H NMR yield); <sup>1</sup>H NMR (400 MHz, Chloroform-*d*) δ 7.95 – 7.93 (m, 2H), 7.56 (t, *J* = 7.4 Hz, 1H), 7.46 (t, *J* = 7.6 Hz, 2H), 7.34 – 7.24 (m, 5H), 7.17 – 7.14 (s, 2H), 7.00 – 6.95 (m, 2H), 6.82 (d, *J* = 8.0 Hz, 1H), 6.56 (d, *J* = 8.4 Hz, 1H), 5.95 (s, 2H), 4.56 – 4.47 (m, 2H), 3.43 – 3.88 (m, 1H), 3.19 – 2.995 (m, 4H), 2.66 – 2.60 (m, 1H), 2.23 – 2.15 (m, 1H), 1.93 – 1.77 (m, 2H). <sup>13</sup>C NMR (126 MHz, CDCl<sub>3</sub>) δ 199.8, 147.9, 145.9, 144.5, 138.7, 136.8, 135.8, 133.1, 128.8, 128.6, 128.6, 128.0, 127.7, 126.9, 126.6, 125.6, 121.4, 119.4, 111.1, 108.4, 106.9, 100.9, 55.2, 56.0, 35.9, 34.5, 32.06, 27.7. HRMS (ESI): Calcd. for C<sub>32</sub>H<sub>30</sub>NO<sub>3</sub><sup>+</sup> [M+H]<sup>+</sup>: 476.2220; found: 476.2217.

(14) 3-(1-benzyl-6-(furan-2-yl)-1,2,3,4-tetrahydroquinolin-3-yl)-1-phenylpropan-1-one (C<sub>14</sub>)

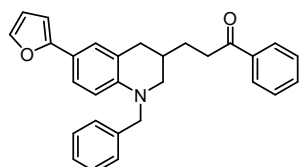

Red oily liquid, (46% <sup>1</sup>H NMR yield); <sup>1</sup>H NMR (400 MHz, Chloroform-*d*) δ 7.95 – 7.93 (m, 2H), 7.56 (t, *J* = 7.4 Hz, 1H), 7.46 (t, *J* = 7.8 Hz, 2H), 7.36 – 7.28 (m, 5H), 7.26 – 7.22 (s, 3H), 6.53 (d, *J* = 8.4 Hz, 1H), 6.41 – 6.37 (m, 2H), 4.57 – 4.47 (m, 2H), 3.43 – 3.39 (m, 1H), 3.19 – 2.94 (m, 4H), 2.64 – 2.58 (m, 1H), 2.18 – 2.09 (m, 1H), 1.92 – 1.77 (m, 2H). <sup>13</sup>C NMR (126 MHz, CDCl<sub>3</sub>) δ 199.8, 154.9, 144.7, 140.5, 138.5, 136.7, 133.1, 128.7, 128.6, 128.0, 126.9, 126.6, 125.1, 123.3, 121.2, 119.48, 111.4, 110.9, 101.7, 55.0, 55.0, 35.8, 34.3, 32.0, 27.6. HRMS (ESI): Calcd. for C<sub>29</sub>H<sub>28</sub>NO<sub>2</sub><sup>+</sup> [M+H]<sup>+</sup>: 422.2115; found: 422.2109.

(15) 3-(1-(naphthalen-2-ylmethyl)-1,2,3,4-tetrahydroquinolin-3-yl)-1-phenylpropan-1-one (C<sub>15</sub>)

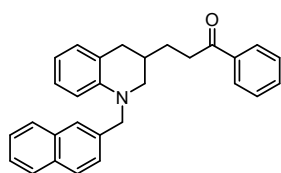

Red solid; M.p. 94-96 °C, (62% <sup>1</sup>H NMR yield); <sup>1</sup>H NMR (400 MHz, Chloroform-*d*) δ 7.90 – 7.88 (m, 2H), 7.81 – 7.74 (m, 3H), 7.69 (s, 1H), 7.53 (t, *J* = 7.4 Hz, 1H), 7.45 – 7.37 (m, 5H), 7.02 – 6.96 (m, 2H), 6.62 (t, *J* = 8.0 Hz, 2H), 4.67 – 4.57 (m, 2H), 3.44 – 3.39 (m, 1H), 3.18 – 2.94 (m, 4H), 2.64 – 2.58 (m, 1H), 2.20 – 2.11 (m, 1H), 1.91 – 1.76 (m, 2H). <sup>13</sup>C NMR (126 MHz, CDCl<sub>3</sub>) δ 199.9, 145.4, 136.9, 136.4, 133.5, 133.0, 132.6, 129.3, 128.6, 128.4, 128.0, 127.7, 127.7, 127.3, 126.1, 125.5, 125.1, 125.0, 121.3, 116.2, 111.0, 55.5, 54.8, 35.8, 34.4, 32.0, 27.7. HRMS (ESI): Calcd. for C<sub>29</sub>H<sub>28</sub>NO<sup>+</sup> [M+H]<sup>+</sup>: 406.2165; found: 406.2162.

(16) 1-phenyl-3-(1-(4-(trifluoromethyl)benzyl)-1,2,3,4-tetrahydroquinolin-3-yl)propan-1-one  
(C<sub>16</sub>)

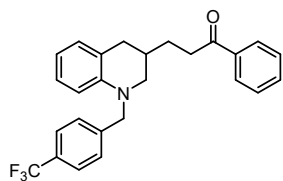

Yellow solid; M.p. 73-75 °C, (61% <sup>1</sup>H NMR yield); <sup>1</sup>H NMR (400 MHz, Chloroform-*d*) δ 7.95 – 7.93 (m, 2H), 7.58 – 7.54 (m, 3H), 7.45 (t, *J* = 7.8 Hz, 2H), 7.36 (d, *J* = 8.0 Hz, 2H), 7.01 – 6.95 (m, 2H), 6.61 (t, *J* = 7.4 Hz, 1H), 6.43 (d, *J* = 8.2 Hz, 1H), 4.52 (s, 2H), 3.39 – 3.34 (m, 1H), 3.16 – 2.99 (m, 3H), 2.97 – 2.92 (m, 1H), 2.62 – 2.56 (m, 1H), 2.19 – 2.08 (m, 1H), 1.92 – 1.75 (m, 2H). <sup>13</sup>C NMR (101 MHz, CDCl<sub>3</sub>) δ 199.8, 144.9, 143.2 (d, *J* = 2.0 Hz), 136.8, 133.1, 129.4, 129.1 (q, *J* = 32.3 Hz), 128.6, 128.0, 127.3, 126.8, 125.5 (q, *J* = 4.0 Hz), 124.2 (q, *J* = 272.7 Hz), 121.4, 116.6, 110.8, 55.3, 55.0, 35.8, 34.2, 32.0, 27.7. <sup>19</sup>F NMR (376 MHz, CDCl<sub>3</sub>) δ -62.28. HRMS (ESI): Calcd. for C<sub>26</sub>H<sub>25</sub>F<sub>3</sub>NO<sup>+</sup> [M+H]<sup>+</sup>: 424.1883; found: 424.1877.

(17) 3-(1-(4-bromobenzyl)-1,2,3,4-tetrahydroquinolin-3-yl)-1-phenylpropan-1-one (C<sub>17</sub>)

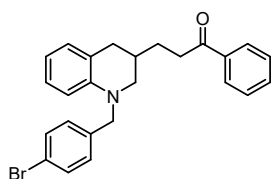

Yellow solid; M.p. 86-88 °C, (63% <sup>1</sup>H NMR yield); <sup>1</sup>H NMR (400 MHz, Chloroform-*d*) δ 7.97 – 7.95 (m, 2H), 7.59 (t, *J* = 7.4 Hz, 1H), 7.50 – 7.43 (m, 4H), 7.15 (d, *J* = 8.2 Hz, 2H), 7.01 (d, *J* = 7.4 Hz, 2H), 6.63 (t, *J* = 7.4 Hz, 1H), 6.48 (d, *J* = 8.2 Hz, 1H), 4.48 – 7.39 (m, 2H), 3.39 – 3.34 (m, 1H), 3.15 – 3.00 (m, 3H), 2.98 – 2.92 (m, 1H), 2.63 – 2.57 (m, 1H), 2.17 – 2.09 (m, 1H), 1.92 – 1.76 (m, 2H). <sup>13</sup>C NMR (101 MHz, CDCl<sub>3</sub>) δ 199.7, 144.9, 137.6, 136.8, 133.0, 131.6, 129.3, 128.6, 128.3, 127.9, 127.2, 121.3, 120.4, 116.3, 110.8, 55.0, 54.7, 35.7, 34.2, 31.9, 27.7. HRMS (ESI): Calcd. for C<sub>25</sub>H<sub>25</sub>NOBr<sup>+</sup> [M+H]<sup>+</sup>: 434.1114; found: 434.1109.

(18) 3-(1-(3-methoxybenzyl)-1,2,3,4-tetrahydroquinolin-3-yl)-1-phenylpropan-1-one (C<sub>18</sub>)

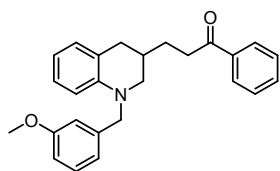

Off-white solid; M.p. 70-72 °C, (61% <sup>1</sup>H NMR yield); <sup>1</sup>H NMR (400 MHz, Chloroform-*d*) δ 7.93 (d, *J* = 7.0 Hz, 2H), 7.54 (t, *J* = 7.4 Hz, 1H), 7.44 (t, *J* = 7.6 Hz, 2H), 7.21 (t, *J* = 8.0 Hz, 1H), 6.99 – 6.95 (m, 2H), 6.84 (d, *J* = 7.6 Hz, 1H), 6.81 (s, 1H), 6.77 – 6.74 (m, 1H), 6.58 (t, *J* = 7.4 Hz, 1H), 6.51 (d, *J* = 8.6 Hz, 1H), 4.48 – 4.39 (m, 2H), 3.74 (s, 3H), 3.38 – 3.35 (m, 1H), 3.14 – 2.96 (m, 3H), 2.94 – 2.89 (m, 1H), 2.60 – 2.54 (m, 1H), 2.16 – 2.07 (m, 1H), 1.89 – 1.73 (m, 2H). <sup>13</sup>C NMR (101 MHz, CDCl<sub>3</sub>) δ 199.8, 159.9, 145.2, 140.6, 136.8, 133.0, 129.6, 129.2, 128.5, 128.0, 127.2, 121.1, 118.8, 116.1, 112.2, 112.0, 110.9, 55.2, 55.1, 54.9, 35.8, 34.3, 32.0, 27.7. HRMS (ESI): Calcd. for C<sub>26</sub>H<sub>28</sub>NO<sub>2</sub><sup>+</sup> [M+H]<sup>+</sup>:

386.2114; found: 386.2109.

(19) 3-(1-methyl-1,2,3,4-tetrahydroquinolin-3-yl)-1-phenylpropan-1-one (**C<sub>19</sub>**)

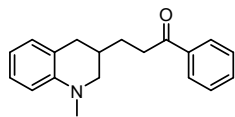

Brown oily liquid, (64% <sup>1</sup>H NMR yield); <sup>1</sup>H NMR (400 MHz, Chloroform-*d*) δ 7.96 (d, *J* = 7.4 Hz, 2H), 7.55 (t, *J* = 7.4 Hz, 1H), 7.45 (t, *J* = 7.6 Hz, 2H), 7.07 (t, *J* = 7.8 Hz, 1H), 6.95 (d, *J* = 7.2 Hz, 1H), 6.62 – 6.57 (m, 2H), 3.25 – 3.21 (m, 1H), 3.14 – 3.00 (m, 2H), 2.98 – 2.93 (m, 1H), 2.89 – 3.84 (m, 4H), 2.54 – 2.47 (m, 1H), 2.11 – 2.01 (m, 1H), 1.89 – 1.71 (m, 2H). <sup>13</sup>C NMR (101 MHz, CDCl<sub>3</sub>) δ 199.9, 146.3, 136.8, 133.0, 128.9, 128.6, 128.0, 127.1, 121.8, 116.3, 110.7, 56.5, 39.0, 35.9, 34.1, 32.1, 28.0. HRMS (ESI): Calcd. for C<sub>19</sub>H<sub>22</sub>NO<sup>+</sup> [M+H]<sup>+</sup>: 280.1696; found: 280.1692.

(20) 3-(2-benzyl-1,2,3,4-tetrahydroisoquinolin-4-yl)-1-phenylpropan-1-one (**C<sub>20</sub>**)

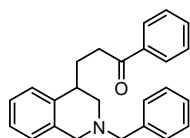

Brown oily liquid, (50% <sup>1</sup>H NMR yield); <sup>1</sup>H NMR (400 MHz, Chloroform-*d*) δ 7.86 – 7.84 (m, 2H), 7.54 (t, *J* = 7.4 Hz, 1H), 7.45 – 7.38 (m, 4H), 7.32 – 7.21 (m, 4H), 7.17 – 7.06 (m, 2H), 7.00 (d, *J* = 6.6 Hz, 1H), 3.84 – 7.72 (m, 2H), 3.58 – 3.44 (m, 2H), 2.98 – 2.799 (m, 4H), 2.58 (dd, *J* = 11.6, 4.2 Hz, 1H), 2.24 – 2.14 (m, 2H). <sup>13</sup>C NMR (126 MHz, CDCl<sub>3</sub>) δ 200.4, 138.7, 138.3, 137.01, 135.0, 132.8, 129.1, 128.5, 128.3, 128.0, 127.1, 126.4, 126.2, 125.8, 62.8, 56.7, 54.0, 37.8, 35.9, 30.3. HRMS (ESI): Calcd. for C<sub>25</sub>H<sub>26</sub>NO<sup>+</sup> [M+H]<sup>+</sup>: 356.2009; found: 356.2005.

(21) 3-(2-benzyl-5-hydroxy-1,2,3,4-tetrahydroisoquinolin-4-yl)-1-phenylpropan-1-one (**C<sub>21</sub>**)

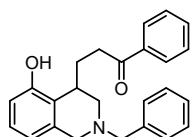

Yellow oily liquid, (14.9 mg, 20% yield); <sup>1</sup>H NMR (400 MHz, Chloroform-*d*) δ 8.59 (s, 1H), 7.99 – 7.97 (m, 2H), 7.59 (t, *J* = 7.4 Hz, 1H), 7.47 (t, *J* = 7.8 Hz, 2H), 7.43 – 7.41 (m, 2H), 7.36 (t, *J* = 7.4 Hz, 2H), 7.32 – 7.28 (m, 1H), 7.07 (t, *J* = 7.8 Hz, 1H), 6.83 (d, *J* = 8.0 Hz, 1H), 6.56 (d, *J* = 7.6 Hz, 1H), 3.90 (d, *J* = 13.6 Hz, 1H), 3.68 (dd, *J* = 80.6, 13.1 Hz, 2H), 3.35 (d, *J* = 14.9 Hz, 1H), 3.13 – 3.07 (m, 1H), 3.00 – 2.91 (m, 1H), 2.83 (d, *J* = 11.5 Hz, 1H), 2.74 – 2.70 (m, 1H), 2.322 – 2.24 (m, 2H), 1.99 (t, *J* = 13.2 Hz, 1H). <sup>13</sup>C NMR (126 MHz, CDCl<sub>3</sub>) δ 202.6, 155.2, 138.7, 136.3, 135.7, 133.8, 128.9, 128.7, 128.3, 127.1, 124.3, 117.6, 113.9, 62.7, 56.5, 52.4, 34.9, 33.2, 26.6. HRMS (ESI): Calcd. for C<sub>25</sub>H<sub>26</sub>NO<sub>2</sub><sup>+</sup> [M+H]<sup>+</sup>: 372.1958; found: 372.1954.

(22) 3-(2-(3-methoxybenzyl)-5-nitro-1,2,3,4-tetrahydroisoquinolin-4-yl)-1-phenylpropan-1-one (**C<sub>22</sub>**)

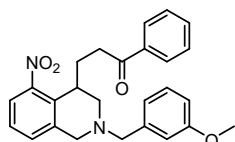

Brown oily liquid, (34.5 mg, 40% yield);  $^1\text{H}$  NMR (400 MHz, Chloroform-*d*)  $\delta$  7.86 – 7.84 (m, 2H), 7.78 – 7.74 (m, 1H), 7.53 (t,  $J = 7.4$  Hz, 1H), 7.43 (t,  $J = 7.6$  Hz, 2H), 7.28 – 7.24 (m, 2H), 7.18 (t,  $J = 7.8$  Hz, 1H), 6.96 – 6.93 (m, 2H), 6.74 – 6.71 (m, 1H), 4.04 (d,  $J = 15.4$  Hz, 1H), 3.75 – 3.69 (m, 4H), 3.58 – 3.34 (m, 3H), 3.04 – 2.95 (m, 2H), 2.79 – 2.71 (m, 1H), 2.43 – 2.31 (m, 2H), 1.92 (t,  $J = 16.6$  Hz, 1H).  $^{13}\text{C}$  NMR (126 MHz,  $\text{CDCl}_3$ )  $\delta$  199.6, 159.7, 149.1, 139.7, 137.6, 136.8, 134.1, 132.8, 131.6, 129.3, 128.4, 128.0, 126.4, 123.2, 121.3, 114.4, 112.7, 62.3, 56.4, 55.0, 51.8, 36.9, 35.0, 29.7. HRMS (ESI): Calcd. for  $\text{C}_{26}\text{H}_{27}\text{N}_2\text{O}_4^+$   $[\text{M}+\text{H}]^+$ : 431.1965; found: 431.1958.

(23) 3-(2-(3-methoxybenzyl)-5-nitro-1,2,3,4-tetrahydroisoquinolin-4-yl)-1-phenylpropan-1-one ( $\text{C}_{23}$ )

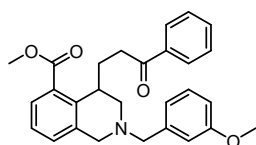

Yellow oily liquid, (30.4 mg, 35% yield);  $^1\text{H}$  NMR (400 MHz, Chloroform-*d*)  $\delta$  7.88 – 7.86 (m, 2H), 7.77 – 7.74 (m, 1H), 7.52 (t,  $J = 7.4$  Hz, 1H), 7.42 (t,  $J = 7.5$  Hz, 2H), 7.20 – 7.13 (m, 3H), 6.89 – 6.95 (m, 2H), 6.74 – 6.72 (m, 1H), 4.04 – 3.95 (m, 1H), 3.83 (s, 3H), 3.78 – 3.71 (m, 2H), 3.69 (s, 3H), 3.52 – 3.41 (m, 2H), 3.05 – 2.97 (m, 2H), 2.81 – 2.73 (m, 1H), 2.41 – 2.38 (m, 1H), 2.34 – 2.24 (m, 1H), 1.93 – 1.89 (m, 1H).  $^{13}\text{C}$  NMR (126 MHz,  $\text{CDCl}_3$ )  $\delta$  200.2, 167.9, 159.6, 140.9, 140.2, 137.0, 135.9, 132.6, 130.6, 129.2, 129.2, 129.0, 128.4, 128.1, 125.5, 121.3, 114.3, 112.6, 62.6, 57.0, 55.0, 52.3, 51.9, 37.2, 35.8, 30.8. HRMS (ESI): Calcd. for  $\text{C}_{28}\text{H}_{30}\text{NO}_4^+$   $[\text{M}+\text{H}]^+$ : 444.2169; found: 444.2163.

(24) 3-(1-benzyl-1,2,3,4-tetrahydroquinolin-3-yl)-1-(*p*-tolyl)propan-1-one ( $\text{C}_{24}$ )

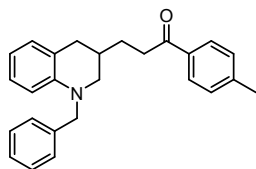

Yellow solid; M.p. 128-130 °C, (40%  $^1\text{H}$  NMR yield);  $^1\text{H}$  NMR (400 MHz, Chloroform-*d*)  $\delta$  7.83 (d,  $J = 8.2$  Hz, 2H), 7.32 – 7.20 (m, 7H), 6.97 (t,  $J = 7.1$  Hz, 2H), 6.58 (t,  $J = 6.8$  Hz, 1H), 6.51 (d,  $J = 8.2$  Hz, 1H), 4.52 – 4.43 (m, 2H), 3.39 – 3.34 (m, 1H), 3.14 – 3.09 (m, 1H), 3.07 – 2.89 (m, 3H), 2.60 – 2.54 (m, 1H), 2.40 (s, 3H), 2.15 – 2.08 (m, 1H), 1.88 – 1.72 (m, 2H).  $^{13}\text{C}$  NMR (101 MHz,  $\text{CDCl}_3$ )  $\delta$  199.6, 145.2, 143.8, 138.8, 134.4, 129.2, 129.2, 128.6, 128.1, 127.2, 126.8, 126.6, 121.2, 116.0, 110.8, 55.2, 55.0, 35.7, 34.4, 32.0, 27.9, 21.6. HRMS (ESI): Calcd. for  $\text{C}_{26}\text{H}_{28}\text{NO}^+$   $[\text{M}+\text{H}]^+$ : 370.2165; found: 370.2159.

(25) 3-(1-benzyl-1,2,3,4-tetrahydroquinolin-3-yl)-1-(4-fluorophenyl)propan-1-one ( $\text{C}_{25}$ )

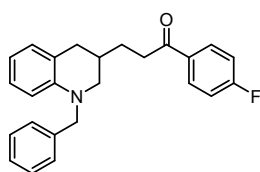

Yellow solid; M.p. 140-142 °C, (68%  $^1\text{H}$  NMR yield);  $^1\text{H}$  NMR (400 MHz, Chloroform-*d*)  $\delta$  7.97 – 7.93 (m, 2H), 7.32 – 7.22 (m, 5H), 7.11 (t,  $J = 8.6$  Hz, 2H), 6.99 – 6.96 (m, 2H), 6.58 (t,  $J = 7.3$  Hz,

1H), 6.52 (d,  $J = 7.6$  Hz, 1H), 4.52 – 4.42 (m, 2H), 3.38 – 3.34 (m, 1H), 3.14 – 3.09 (m, 1H), 3.03 – 2.89 (m, 3H), 2.60 – 2.54 (m, 1H), 2.14 – 2.05 (m, 1H), 1.89 – 1.74 (m, 2H).  $^{13}\text{C}$  NMR (126 MHz,  $\text{CDCl}_3$ )  $\delta$  159.4, 158.7, 142.1, 141.0, 129.4 (d,  $J = 32.3$  Hz), 129.0, 127.8, 127.2, 126.8, 126.6, 125.7 (d,  $J = 4.0$  Hz), 124.1 (d,  $J = 272.0$  Hz), 118.3, 111.2, 108.3, 84.6, 61.3, 52.1, 27.9, 27.3, 14.4.  $^{19}\text{F}$  NMR (376 MHz,  $\text{CDCl}_3$ )  $\delta$  -105.27. HRMS (ESI): Calcd. for  $\text{C}_{25}\text{H}_{25}\text{NOF}^+$   $[\text{M}+\text{H}]^+$ : 3374.1915; found: 374.1912.

(26) 3-(1-benzyl-1,2,3,4-tetrahydroquinolin-3-yl)-1-(4-chlorophenyl)propan-1-one ( $\text{C}_{26}$ )

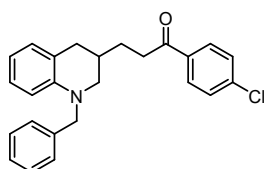

Yellow solid; M.p. 129-131 °C, (44%  $^1\text{H}$  NMR yield);  $^1\text{H}$  NMR (400 MHz, Chloroform- $d$ )  $\delta$  7.86 (d,  $J = 8.6$  Hz, 2H), 7.42 (d,  $J = 8.6$  Hz, 2H), 7.32 – 7.23 (m, 5H), 7.00 – 6.97 (m, 2H), 6.59 (t,  $J = 7.3$  Hz, 1H), 6.53 (d,  $J = 8.6$  Hz, 1H), 4.53 – 4.43 (m, 2H), 3.38 – 3.35 (m, 1H), 3.14 – 2.94 (m, 4H), 2.61 – 2.54 (m, 1H), 2.14 – 2.06 (m, 1H), 1.88 – 1.75 (m, 2H).  $^{13}\text{C}$  NMR (126 MHz,  $\text{CDCl}_3$ )  $\delta$  198.6, 145.2, 139.5, 138.8, 135.1, 129.4, 129.2, 128.9, 128.6, 127.3, 126.8, 126.6, 121.1, 116.1, 110.7, 55.1, 54.8, 35.8, 34.3, 31.9, 27.6. HRMS (ESI): Calcd. for  $\text{C}_{25}\text{H}_{25}\text{ClNO}^+$   $[\text{M}+\text{H}]^+$ : 390.1619; found: 390.1614.

(27) 3-(1-benzyl-1,2,3,4-tetrahydroquinolin-3-yl)-1-(4-bromophenyl)propan-1-one ( $\text{C}_{27}$ )

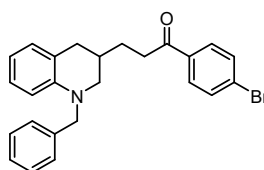

Yellow solid; M.p. 133-135 °C, (41%  $^1\text{H}$  NMR yield);  $^1\text{H}$  NMR (400 MHz, Chloroform- $d$ )  $\delta$  7.77 (d,  $J = 8.6$  Hz, 2H), 7.58 (d,  $J = 8.5$  Hz, 2H), 7.31 – 7.22 (m, 5H), 6.70 – 6.96 (m, 2H), 6.58 (t,  $J = 7.3$  Hz, 1H), 6.53 (d,  $J = 8.5$  Hz, 1H), 4.52 – 4.42 (m, 2H), 3.37 – 3.33 (m, 1H), 3.13 – 3.08 (m, 1H), 3.01 – 2.89 (m, 3H), 2.60 – 2.54 (m, 1H), 2.13 – 2.07 (m, 1H), 1.86 – 1.74 (m, 2H).  $^{13}\text{C}$  NMR (126 MHz,  $\text{CDCl}_3$ )  $\delta$  198.8, 145.2, 138.8, 135.5, 131.7, 129.5, 129.2, 128.6, 128.1, 127.3, 126.8, 126.6, 121.0, 116.1, 110.8, 55.1, 54.8, 35.8, 34.3, 31.9, 27.6. HRMS (ESI): Calcd. for  $\text{C}_{25}\text{H}_{25}\text{NOBr}^+$   $[\text{M}+\text{H}]^+$ : 434.1114; found: 434.1110.

(28) 3-(1-benzyl-1,2,3,4-tetrahydroquinolin-3-yl)-1-(4-methoxyphenyl)propan-1-one ( $\text{C}_{28}$ )

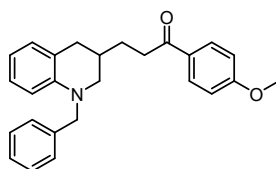

Off-white solid; M.p. 114-116 °C, (39%  $^1\text{H}$  NMR yield);  $^1\text{H}$  NMR (400 MHz, Chloroform- $d$ )  $\delta$  7.93 – 7.91 (m, 2H), 7.32 – 7.22 (m, 5H), 6.99 – 6.91 (m, 4H), 6.58 (t,  $J = 6.8$  Hz, 1H), 6.52 (d,  $J = 7.6$  Hz, 1H), 4.53 – 4.43 (m, 2H), 3.86 (s, 3H), 3.39 – 3.35 (m, 1H), 3.14 – 3.09 (m, 1H), 3.02 – 2.89 (m, 3H), 2.61 – 2.54 (m, 1H), 2.13 – 2.07 (m, 1H), 1.87 – 1.76 (m, 2H).  $^{13}\text{C}$  NMR (126 MHz,  $\text{CDCl}_3$ )  $\delta$  198.5,

163.4, 145.3, 138.8, 130.3, 129.9, 129.2, 128.6, 127.2, 126.8, 126.6, 121.2, 116.0, 113.7, 110.8, 55.4, 55.2, 55.0, 35.5, 34.4, 32.0, 28.0. HRMS (ESI): Calcd. for  $C_{26}H_{28}NO_2^+$   $[M+H]^+$ : 386.2115; found: 386.2110.

(29) 3-(1-benzyl-1,2,3,4-tetrahydroquinolin-3-yl)-1-(2-fluorophenyl)propan-1-one ( $C_{29}$ )

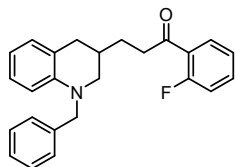

Yellow solid; M.p. 74-76 °C, (64%  $^1H$  NMR yield);  $^1H$  NMR (400 MHz, Chloroform-*d*)  $\delta$  7.86 – 7.81 (m, 1H), 7.53 – 7.47 (m, 1H), 7.32 – 7.20 (m, 6H), 7.14 – 7.10 (m, 1H), 6.97 (t,  $J = 7.3$  Hz, 2H), 6.58 (t,  $J = 7.3$  Hz, 1H), 6.51 (d,  $J = 7.5$  Hz, 1H), 4.52 – 4.43 (m, 2H), 3.38 – 3.34 (m, 1H), 3.14 – 3.05 (m, 3H), 2.94 – 2.88 (m, 1H), 2.60 – 2.53 (m, 1H), 2.13 – 2.05 (m, 1H), 1.88 – 1.73 (m, 2H).  $^{13}C$  NMR (126 MHz,  $CDCl_3$ )  $\delta$  198.3 (d,  $J = 3.8$  Hz), 161.8 (d,  $J = 254.5$  Hz), 145.2, 138.8, 134.4 (d,  $J = 2.5$  Hz), 130.6 (d,  $J = 2.5$  Hz), 129.2, 128.6, 127.2, 126.8, 126.6, 125.7 (d,  $J = 12.6$  Hz), 124.5 (d,  $J = 3.8$  Hz), 121.2, 116.6 (d,  $J = 25.2$  Hz), 116.0, 110.9, 55.2, 55.0, 40.9 (d,  $J = 7.6$  Hz), 34.3, 31.6, 27.5 (d,  $J = 1.3$  Hz).  $^{19}F$  NMR (376 MHz,  $CDCl_3$ )  $\delta$  -109.47. HRMS (ESI): Calcd. for  $C_{25}H_{25}NOF^+$   $[M+H]^+$ : 374.1915; found: 374.1910.

(30) 4-(1-benzyl-1,2,3,4-tetrahydroquinolin-3-yl)butan-2-one ( $C_{30}$ )

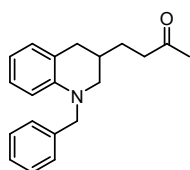

Brown oily liquid,  $^1H$  NMR (400 MHz, Chloroform-*d*)  $\delta$  7.33 – 7.23 (m, 5H), 6.99 – 6.96 (m, 2H), 6.58 (t,  $J = 7.3$  Hz, 1H), 6.52 (d,  $J = 7.6$  Hz, 1H), 4.51 – 4.42 (m, 2H), 3.33 – 3.28 (m, 1H), 3.08 – 3.03 (m, 1H), 2.89 – 2.84 (m, 1H), 2.55 – 2.47 (m, 3H), 2.13 (s, 3H), 2.04 – 1.96 (m, 1H), 1.72 – 1.59 (m, 2H).  $^{13}C$  NMR (126 MHz,  $CDCl_3$ )  $\delta$  208.5, 145.2, 138.8, 129.2, 128.6, 127.2, 126.8, 126.6, 121.1, 116.1, 110.8, 55.1, 54.8, 41.0, 34.3, 31.9, 29.9, 27.2. HRMS (ESI): Calcd. for  $C_{20}H_{25}NO^+$   $[M+H]^+$ : 294.1852; found: 294.1848.

(31) (1S,4R)-N-(1-benzyl-3-(3-oxo-3-phenylpropyl)-1,2,3,4-tetrahydroquinolin-6-yl)-4,7,7-trimethyl-3-oxo-2-oxabicyclo[2.2.1]heptane-1-carboxamide ( $C_{31}$ )

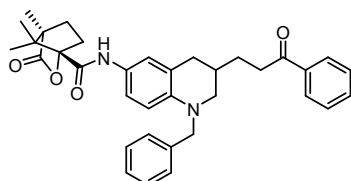

Yellow oily liquid, (62.3 mg, 55% yield);  $^1H$  NMR (400 MHz, Chloroform-*d*)  $\delta$  7.94 – 7.92 (m, 3H), 7.55 (t,  $J = 7.2$  Hz, 1H), 7.45 (t,  $J = 7.7$  Hz, 2H), 7.35 – 7.28 (m, 3H), 7.25 – 7.22 (m, 2H), 7.07 – 7.02 (m, 1H), 6.46 (d,  $J = 8.8$  Hz, 1H), 4.52 – 4.42 (m, 2H), 3.38 – 3.35 (m, 1H), 3.15 – 3.10 (m, 1H), 3.08 – 3.01 (m, 2H), 2.95 – 2.91 (m, 1H), 2.63 – 2.54 (m, 2H), 2.10 (s, 1H), 2.00 – 1.94 (m, 2H), 1.88 – 1.67



(m, 4H), 1.15 (s, 3H), 1.13 (s, 3H), 0.96 (s, 3H).  $^{13}\text{C}$  NMR (101 MHz,  $\text{CDCl}_3$ )  $\delta$  199.7, 178.1, 164.4, 142.8, 138.4, 136.8, 133.0, 128.5, 127.9, 126.8, 126.5, 125.7, 121.8, 121.5, 119.6, 110.8, 92.4, 55.3, 55.1, 54.8, 54.1, 35.7, 34.3, 31.9, 30.3, 29.0, 27.5, 16.7, 16.5, 9.7. HRMS (ESI): Calcd. for  $\text{C}_{35}\text{H}_{39}\text{N}_2\text{O}_4^+$   $[\text{M}+\text{H}]^+$ : 551.2904; found: 551.2897.

(32) 1-phenyl-3-(1,2,3,4-tetrahydroquinolin-3-yl)propan-1-ol ( $\text{C}_{32}$ )

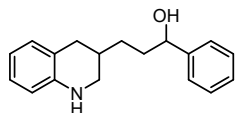

Yellow oily liquid, (35.8 mg, 67% yield, d.r. 3:2);  $^1\text{H}$  NMR (400 MHz, Chloroform-*d*)  $\delta$  7.36 – 7.31 (m, 4H), 7.29 – 7.25 (m, 1H), 6.96 – 6.90 (m, 2H), 6.59 (t,  $J = 7.4$  Hz, 1H), 6.44 (d,  $J = 9.1$  Hz, 1H), 4.65 – 4.61 (m, 1H), 3.27 – 3.23 (m, 1H), 2.88 – 2.75 (m, 2.5H), 2.44 – 2.36 (m, 1H), 1.95 – 1.71 (m, 3H), 1.56 – 1.40 (m, 1H), 1.38 – 1.17 (m, 1H).  $^{13}\text{C}$  NMR (101 MHz,  $\text{CDCl}_3$ )  $\delta$  144.7, 144.4, 129.6, 129.5, 128.5, 127.6, 126.7, 125.8, 120.8, 117.0, 113.9, 74.7, 74.6, 47.1, 47.0, 36.4, 36.3, 33.6, 33.5, 32.2, 32.1, 29.8, 29.7. HRMS (ESI): Calcd. for  $\text{C}_{18}\text{H}_{22}\text{NO}^+$   $[\text{M}+\text{H}]^+$ : 268.1696; found: 268.1690.

(33) 1-benzyl-3-(3-phenylbut-3-en-1-yl)-1,2,3,4-tetrahydroquinoline ( $\text{C}_{33}$ )

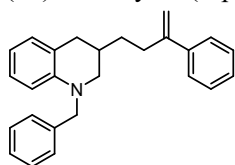

Yellow oily liquid, (53.0 mg, 75% yield);  $^1\text{H}$  NMR (400 MHz, Chloroform-*d*)  $\delta$  7.38 – 7.36 (m, 2H), 7.32 – 7.19 (m, 8H), 6.97 – 6.94 (m, 2H), 6.57 (t,  $J = 7.8$  Hz, 1H), 6.49 (d,  $J = 8.6$  Hz, 1H), 5.25 (s, 1H), 5.04 (s, 1H), 4.44 (s, 2H), 3.32 – 3.28 (m, 1H), 3.06 – 3.01 (m, 1H), 2.90 – 2.84 (m, 5.6 Hz, 1H), 2.65 – 2.47 (m, 3H), 2.08 – 2.00 (m, 1H), 1.53 – 1.45 (m, 2H).  $^{13}\text{C}$  NMR (101 MHz,  $\text{CDCl}_3$ )  $\delta$  148.2, 145.3, 141.1, 138.9, 129.2, 128.5, 128.3, 127.4, 127.1, 126.7, 126.5, 126.1, 121.5, 115.9, 112.5, 110.7, 55.1, 55.0, 34.5, 32.6, 32.1, 31.9. HRMS (ESI): Calcd. for  $\text{C}_{26}\text{H}_{28}\text{N}^+$   $[\text{M}+\text{H}]^+$ : 354.2216; found: 354.2213.

## NMR spectra of the obtained compounds

### <sup>1</sup>H-NMR spectrum of C<sub>1</sub>

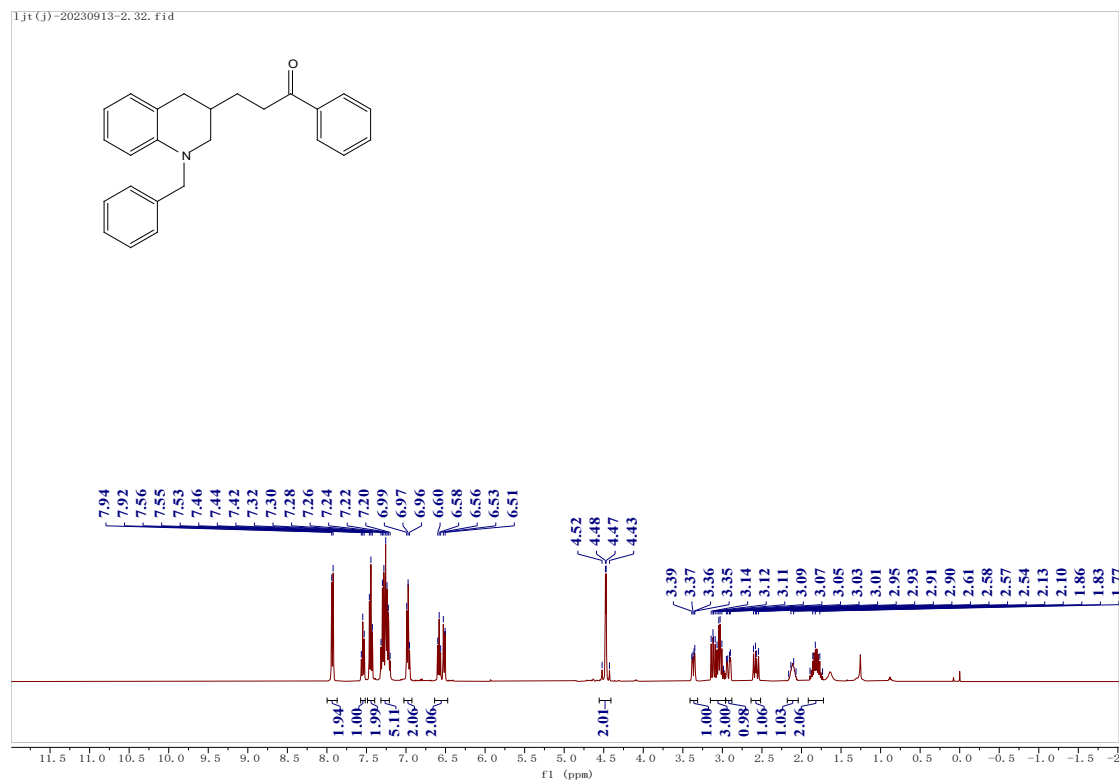

### <sup>13</sup>C-NMR spectrum of C<sub>1</sub>

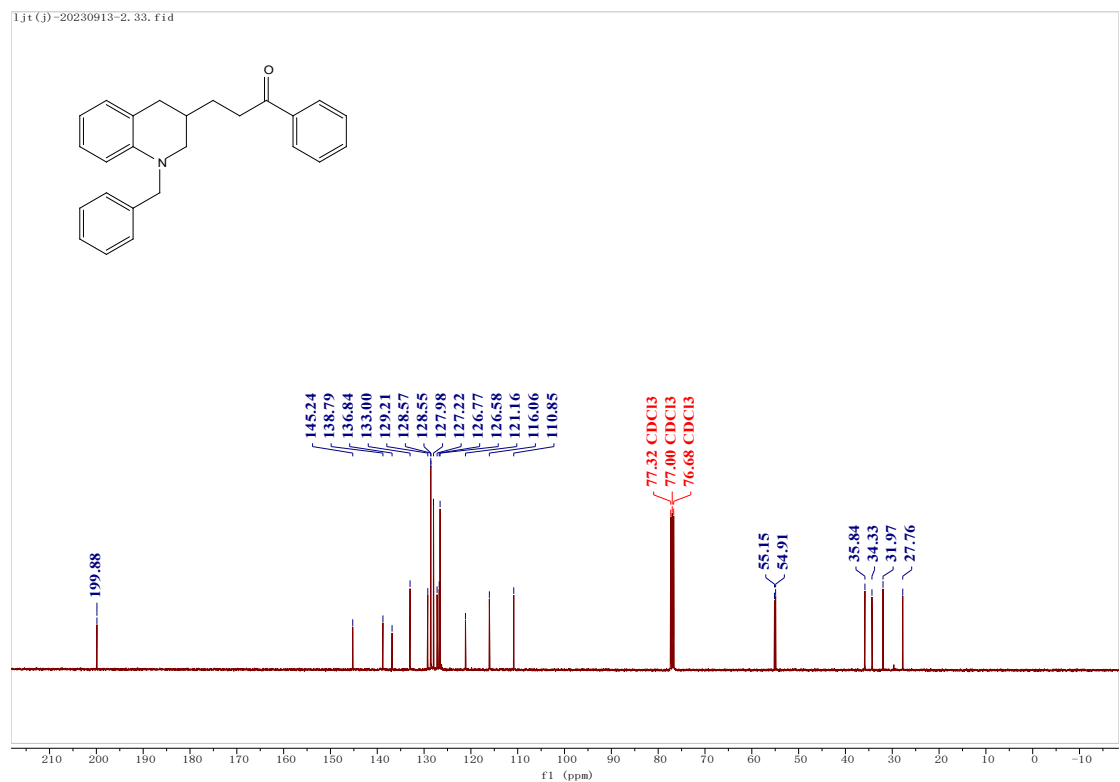

## <sup>1</sup>H-NMR spectrum of C<sub>2</sub>

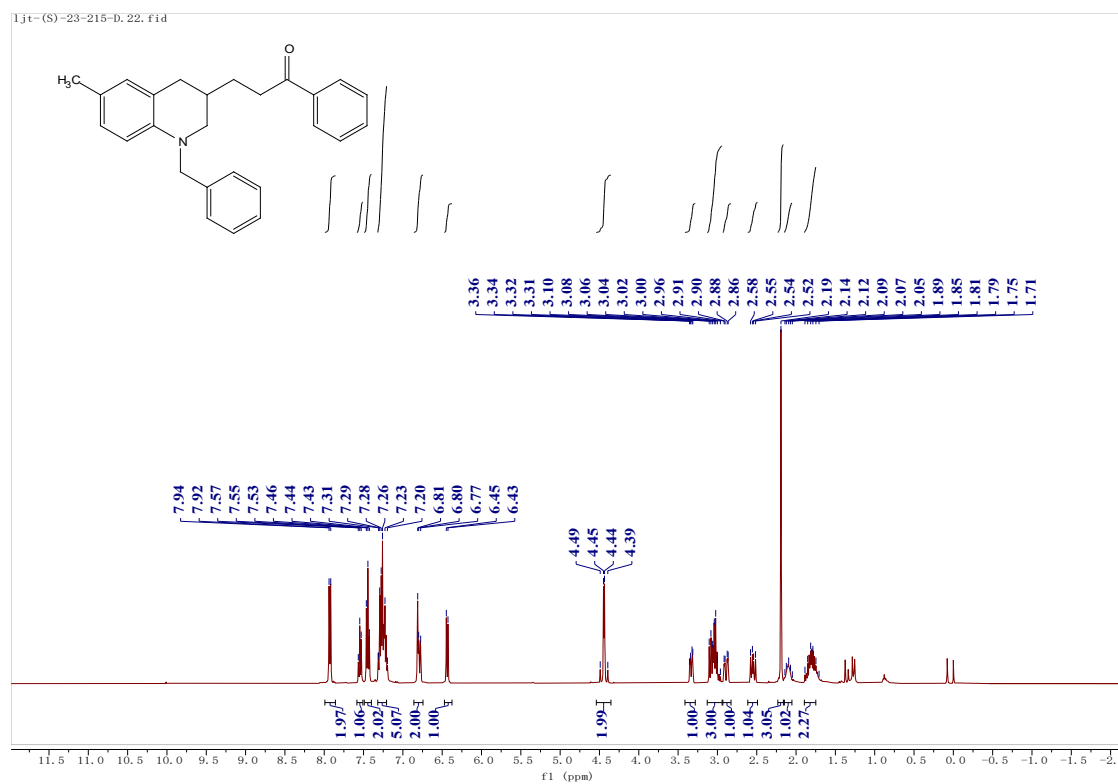

## <sup>13</sup>C-NMR spectrum of C<sub>2</sub>

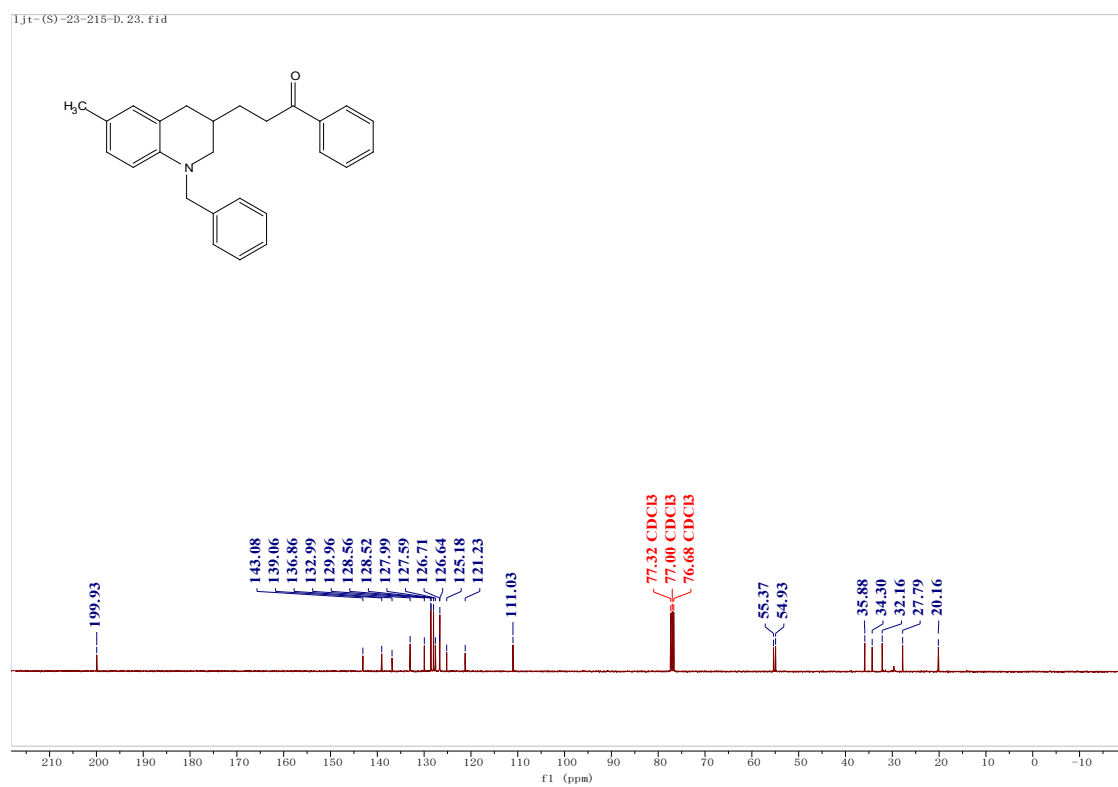

### <sup>1</sup>H-NMR spectrum of C<sub>3</sub>

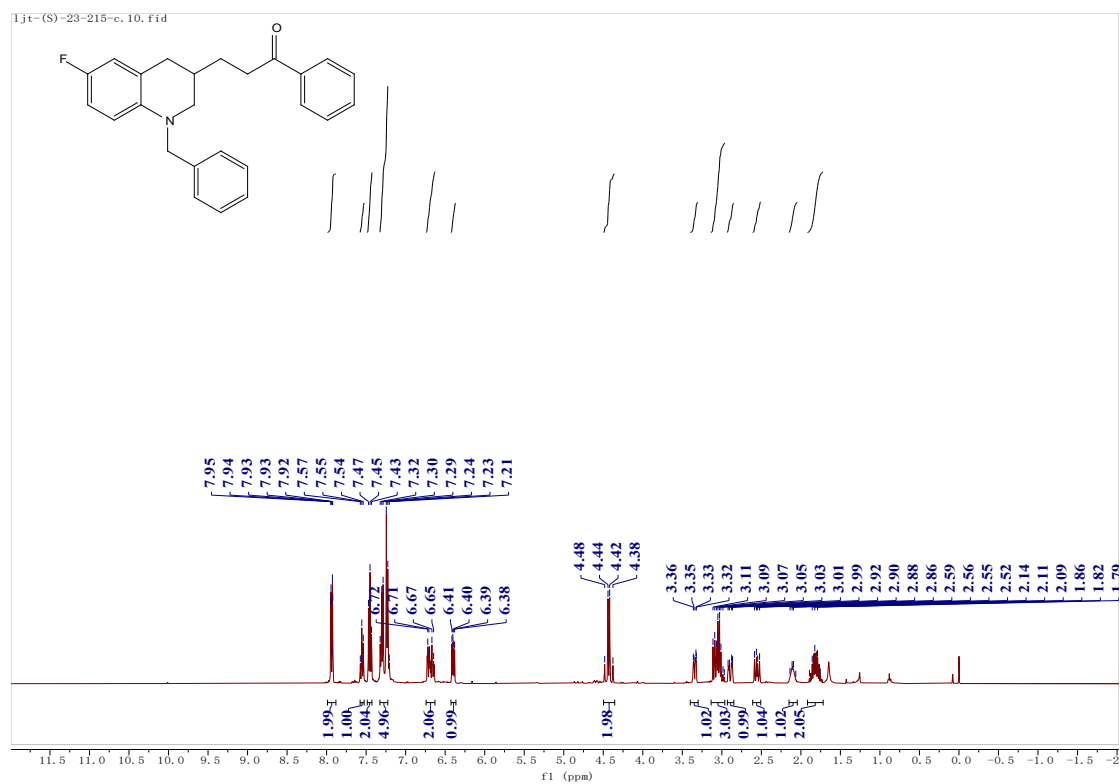

### <sup>13</sup>C-NMR spectrum of C<sub>3</sub>

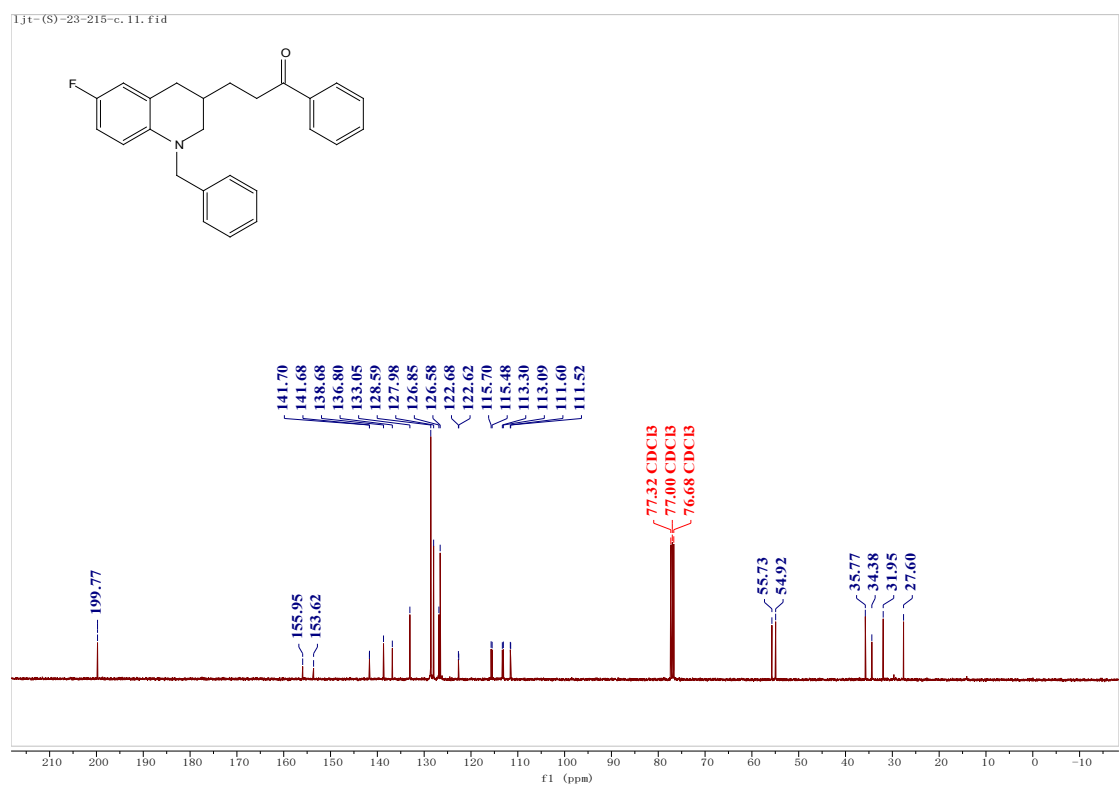

### <sup>19</sup>F-NMR spectrum of C<sub>3</sub>

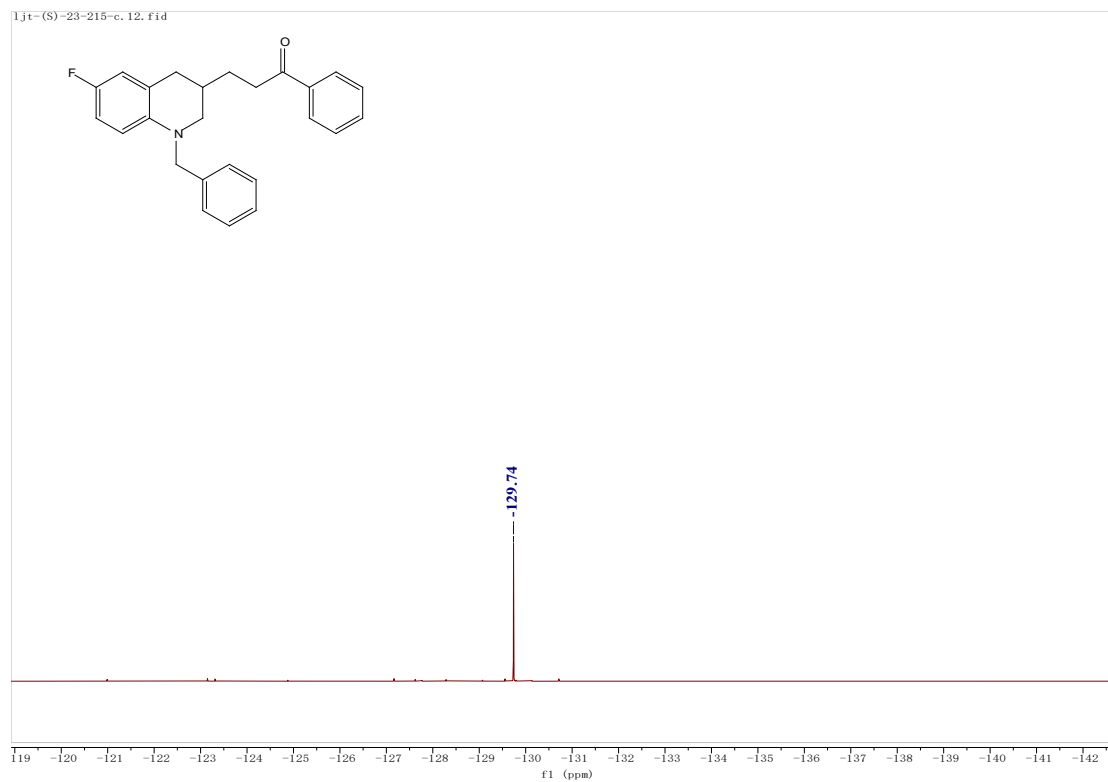

### <sup>1</sup>H-NMR spectrum of C<sub>4</sub>

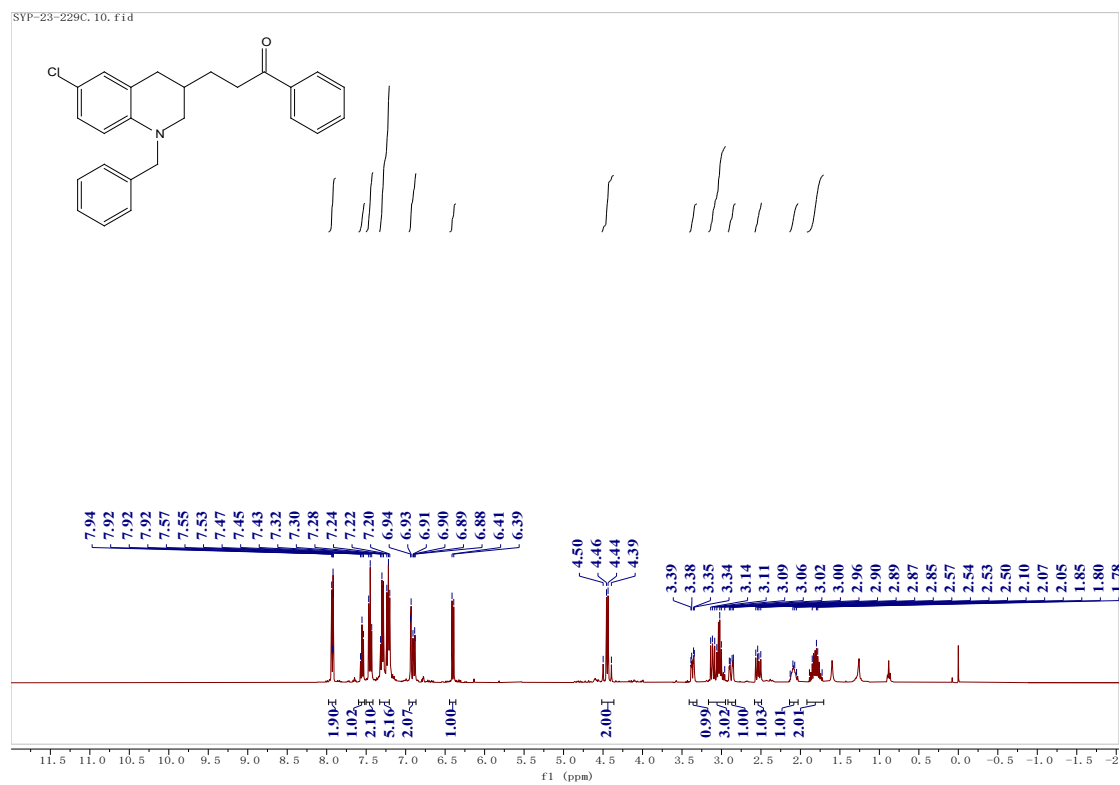

### <sup>13</sup>C-NMR spectrum of C<sub>4</sub>

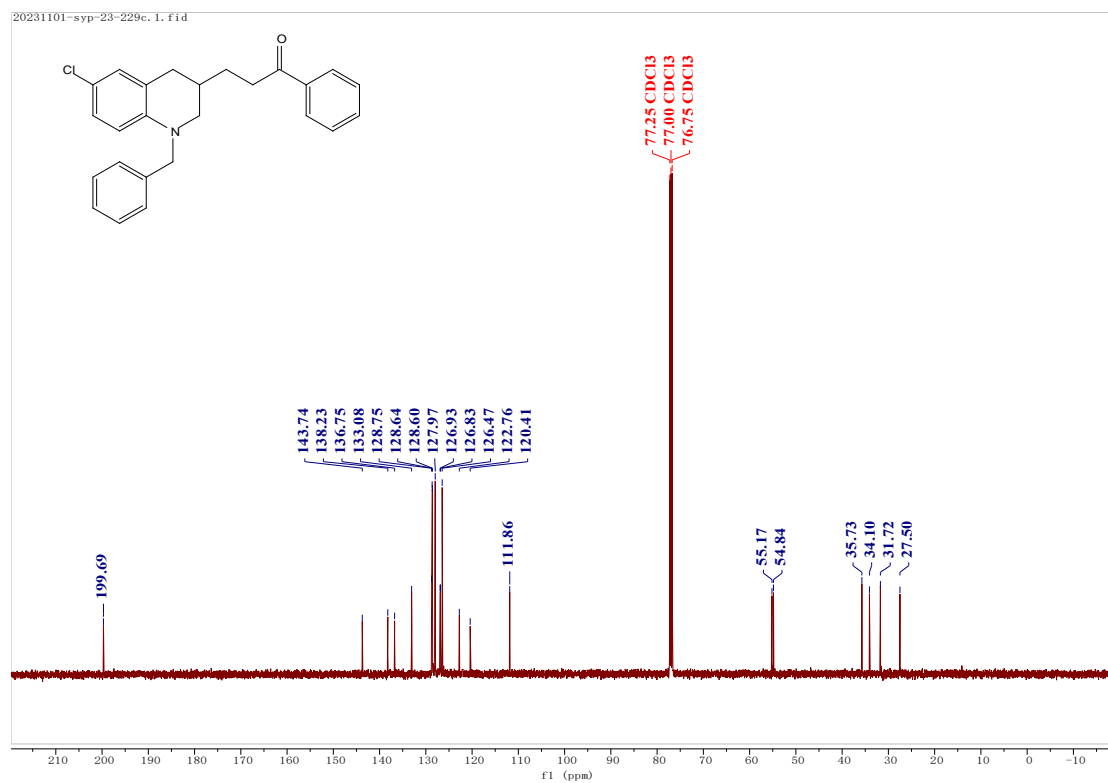

### <sup>1</sup>H-NMR spectrum of C<sub>5</sub>

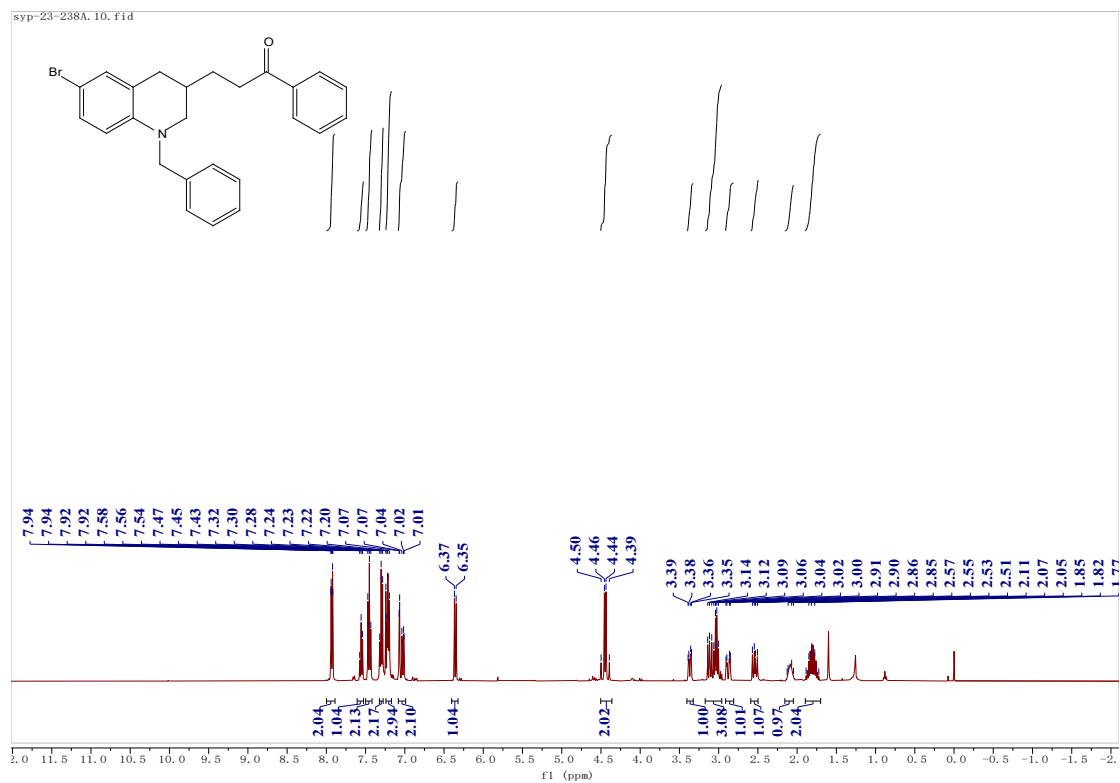

### <sup>13</sup>C-NMR spectrum of C<sub>5</sub>

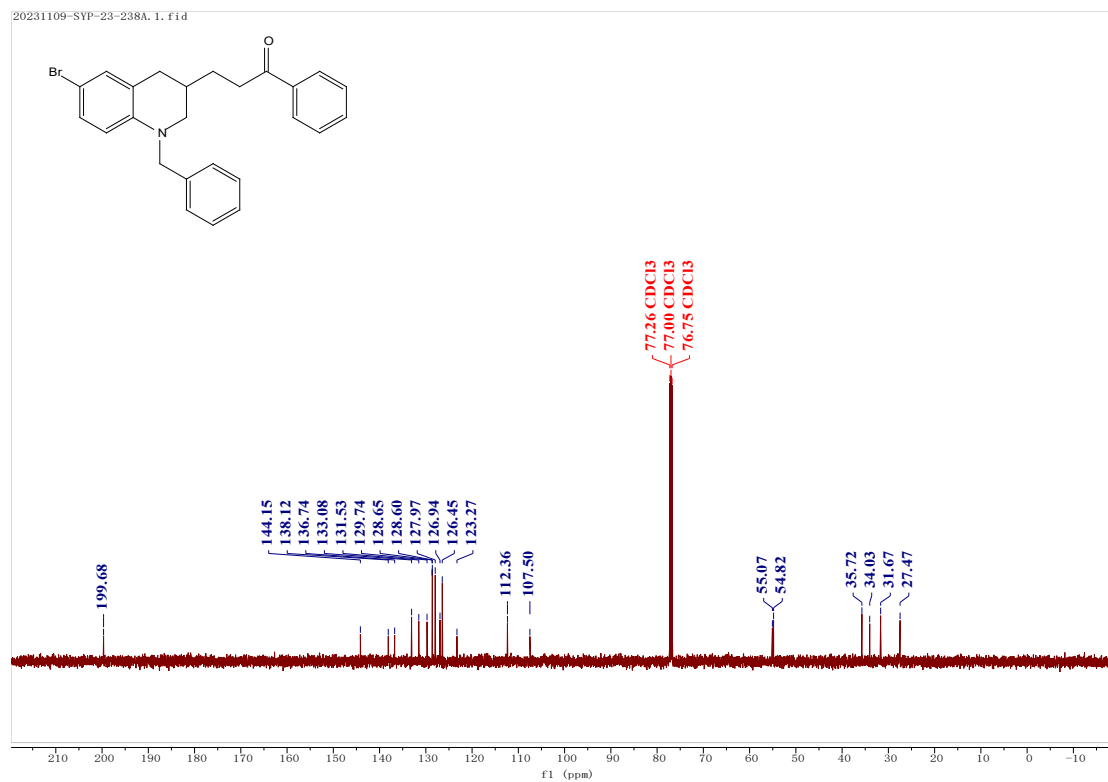

### <sup>1</sup>H-NMR spectrum of C<sub>6</sub>

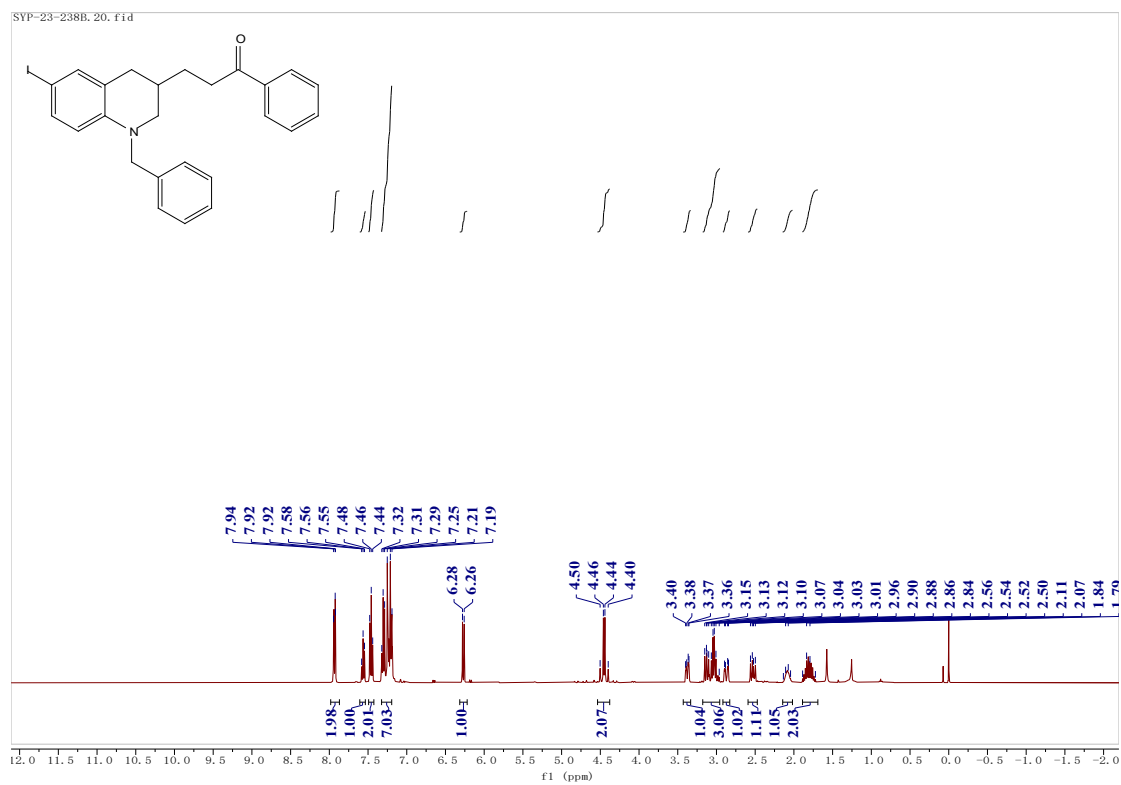

### $^{13}\text{C}$ -NMR spectrum of $\text{C}_6$

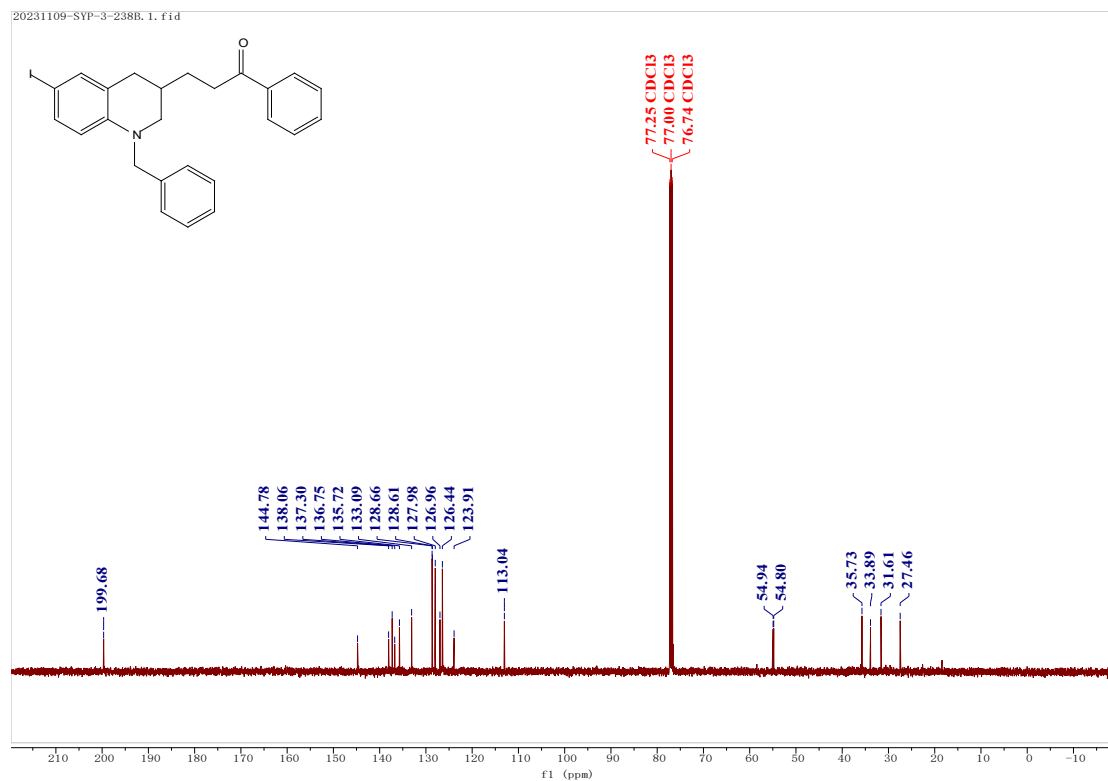

### $^1\text{H}$ -NMR spectrum of $\text{C}_7$

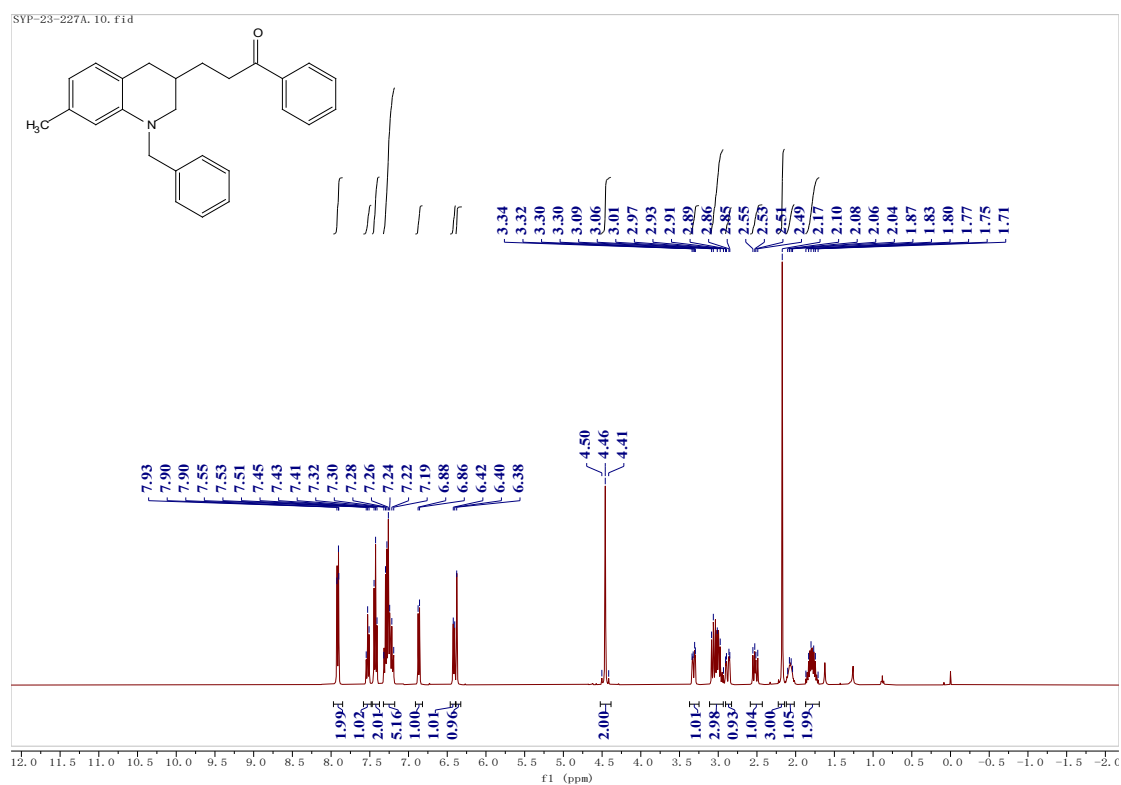



### <sup>13</sup>C-NMR spectrum of C<sub>7</sub>

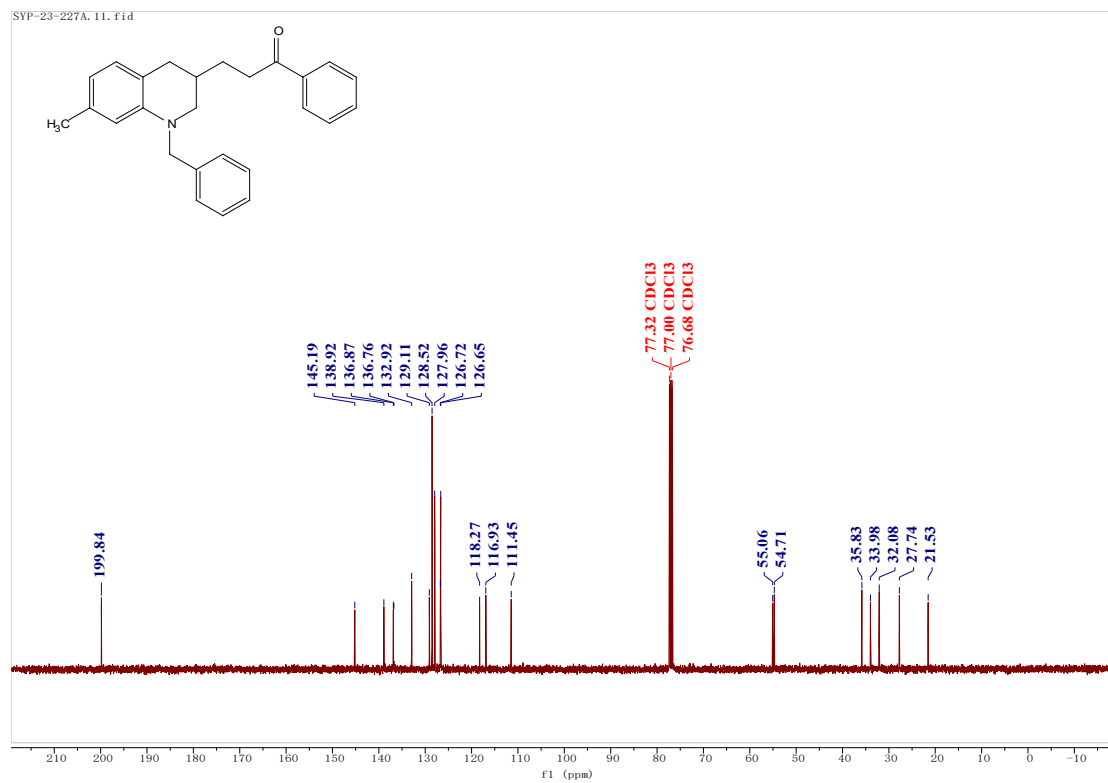

### <sup>1</sup>H-NMR spectrum of C<sub>8</sub>

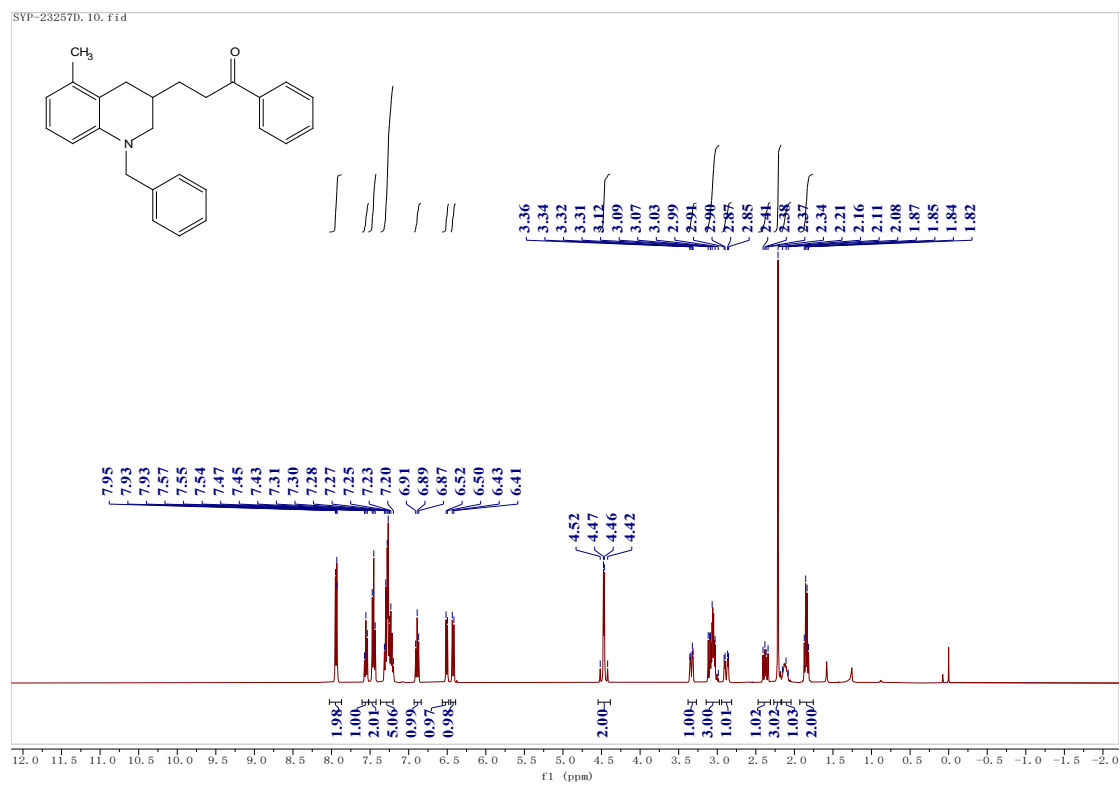

### $^{13}\text{C}$ -NMR spectrum of $\text{C}_8$

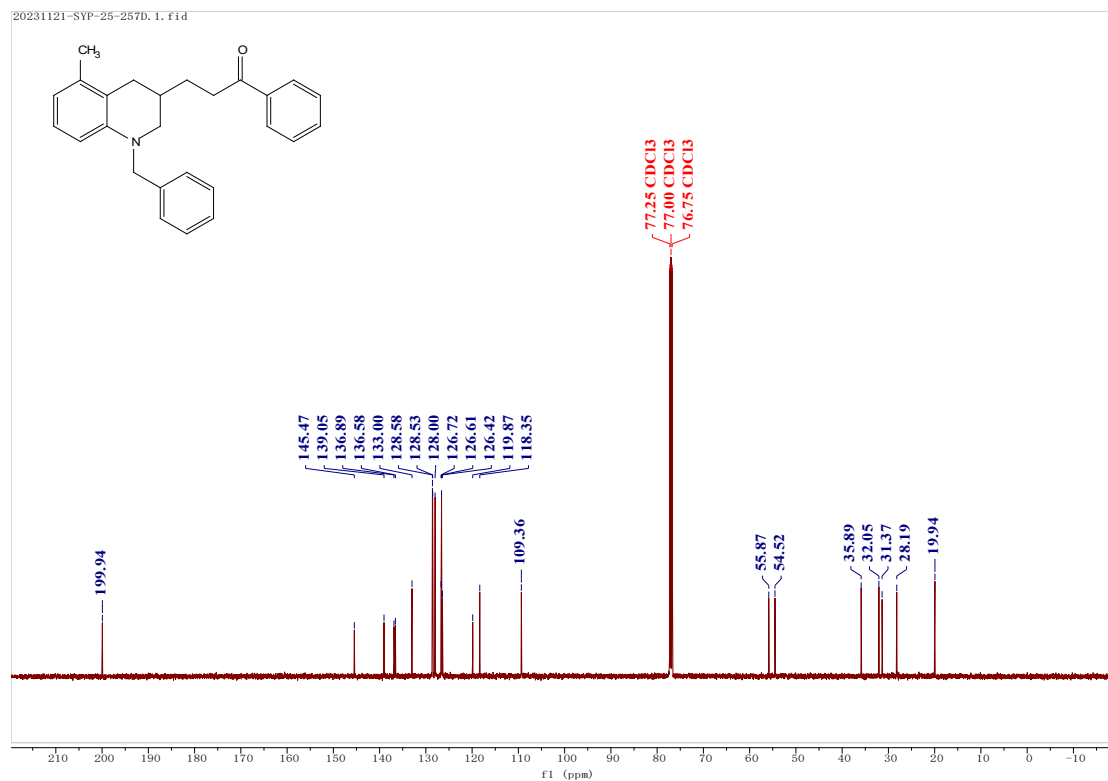

### $^1\text{H}$ -NMR spectrum of $\text{C}_9$

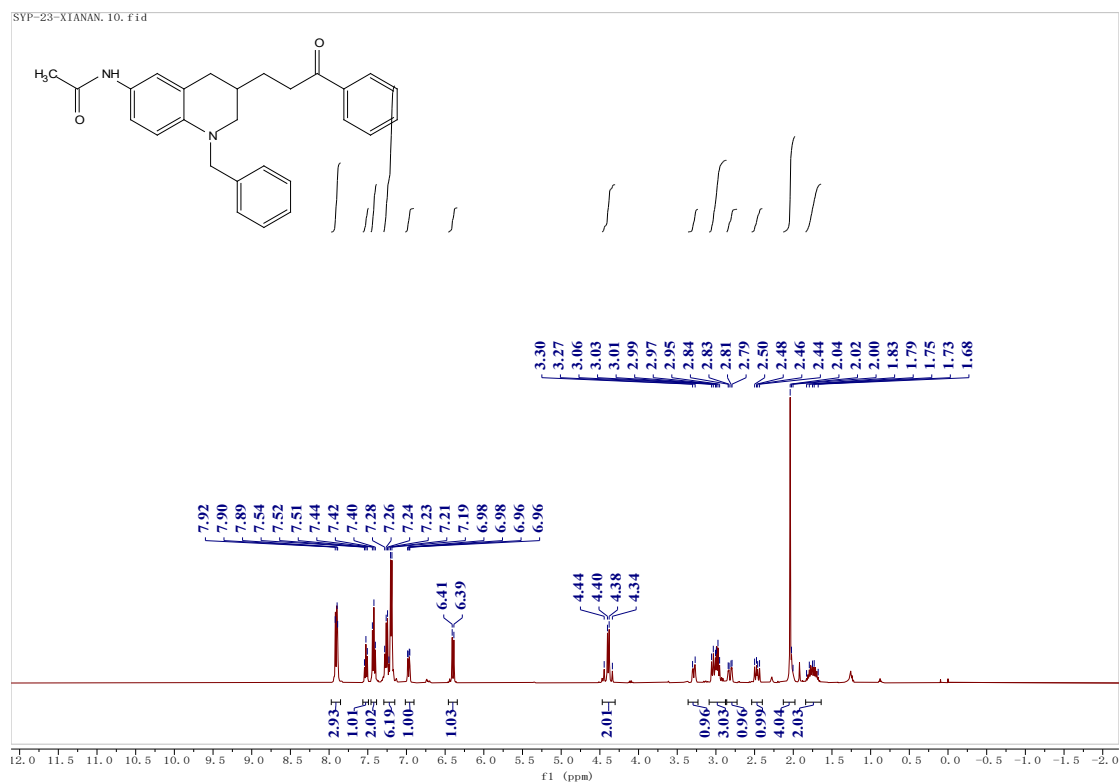

### <sup>13</sup>C-NMR spectrum of **C**<sub>9</sub>

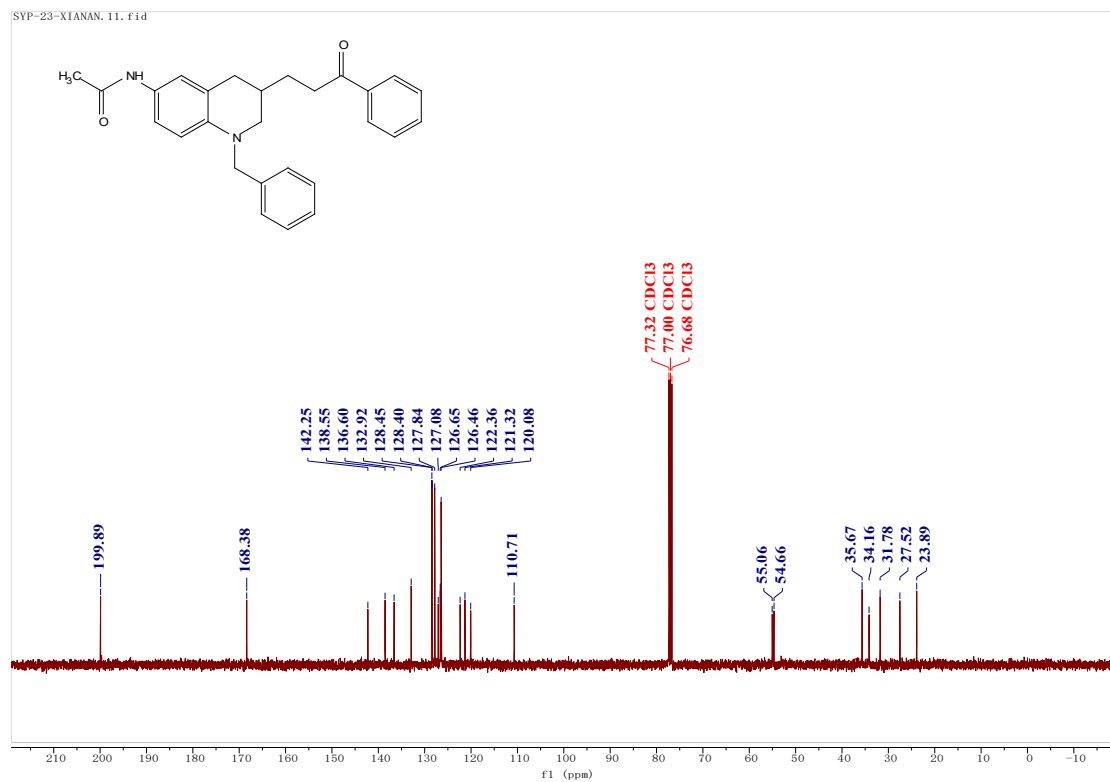

### <sup>1</sup>H-NMR spectrum of **C**<sub>10</sub>

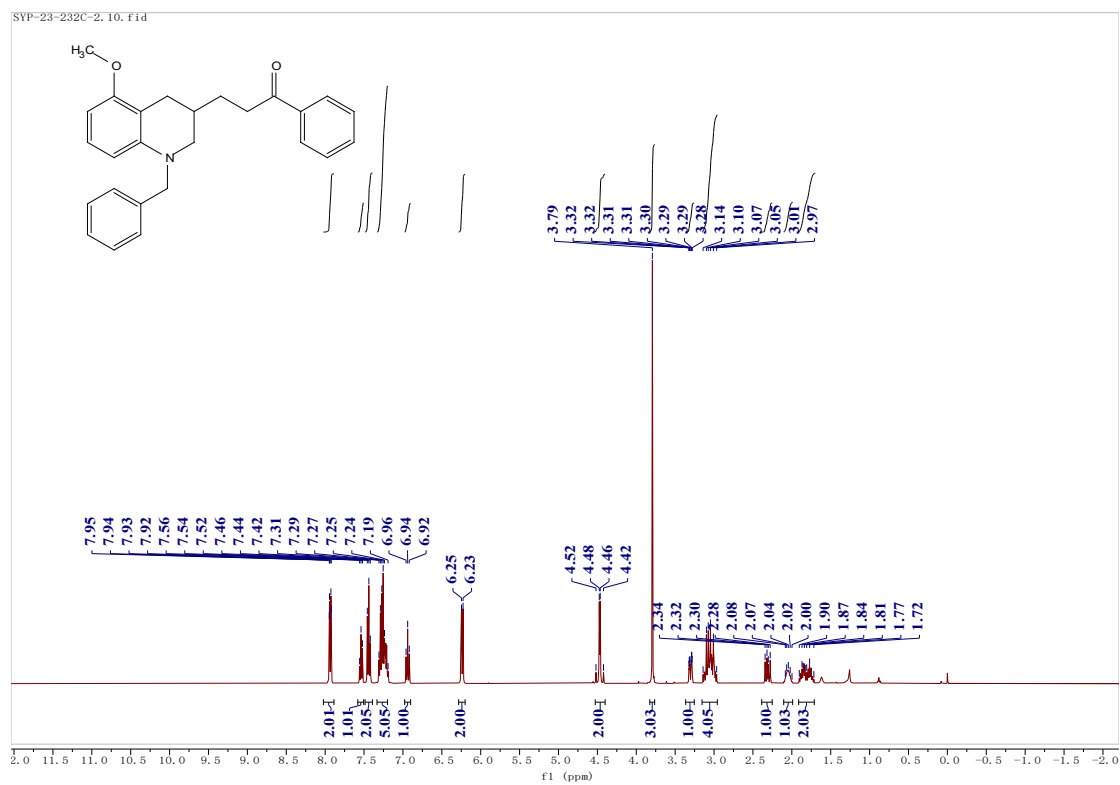

### <sup>13</sup>C-NMR spectrum of C<sub>10</sub>

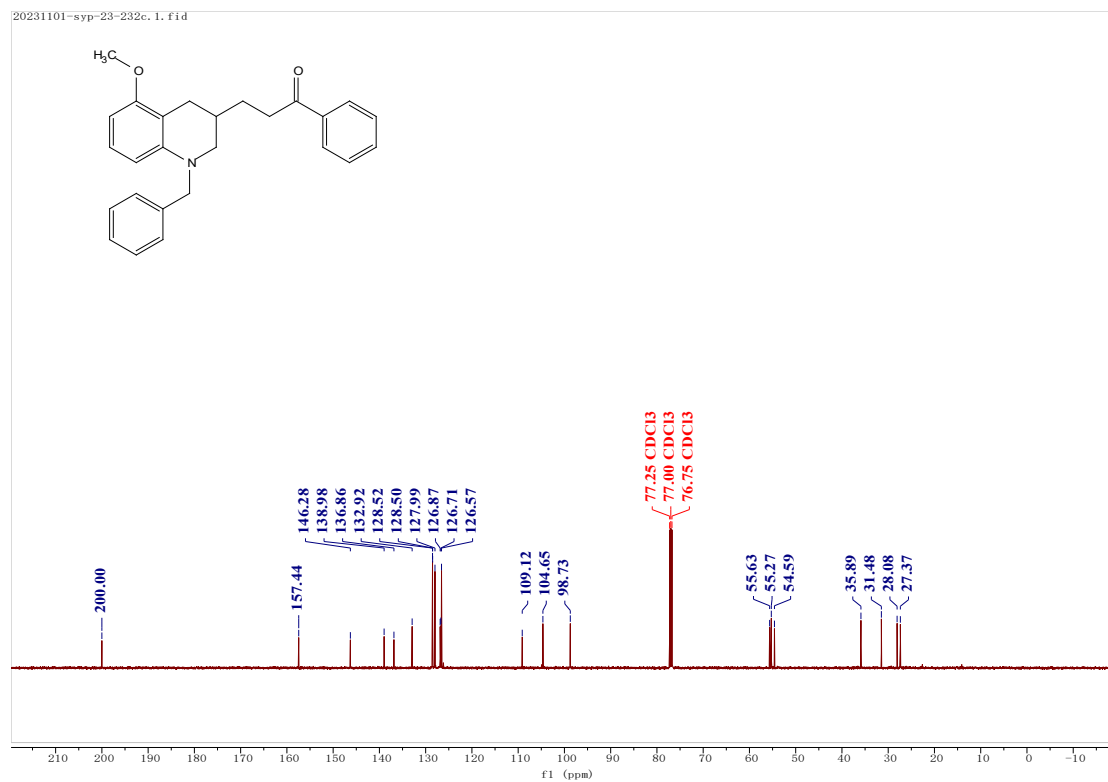

### <sup>1</sup>H-NMR spectrum of C<sub>11</sub>

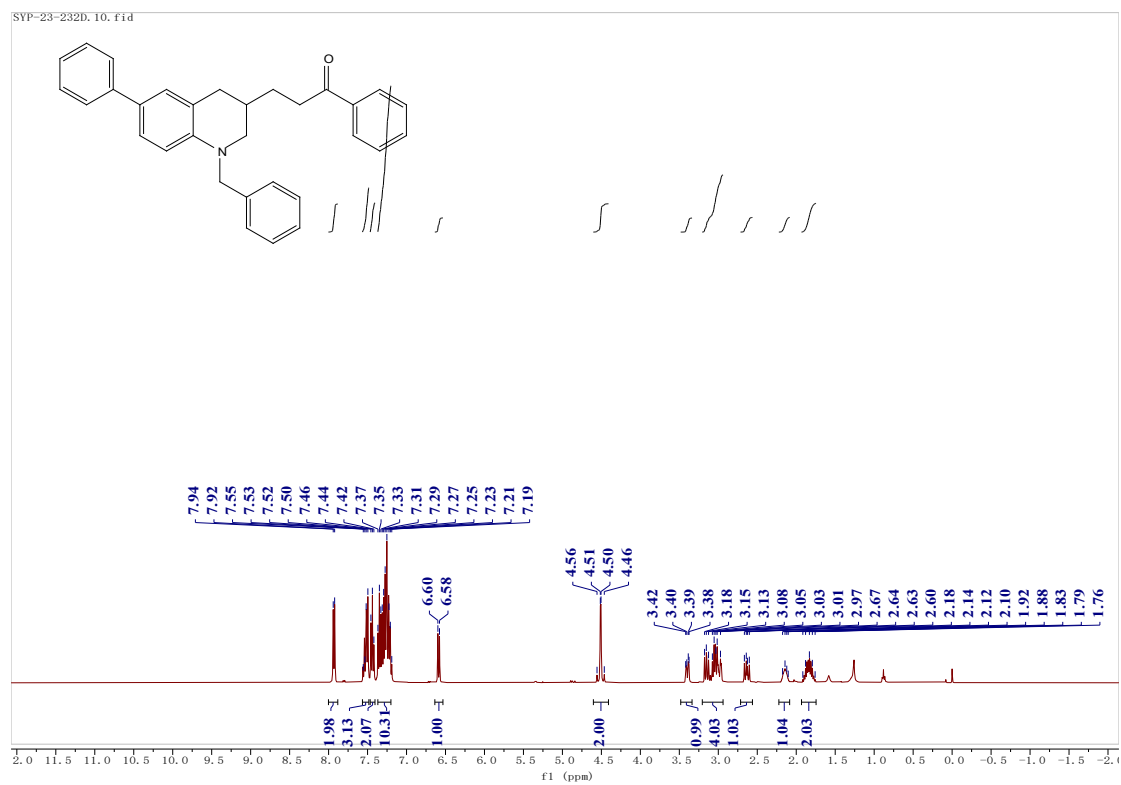

### <sup>13</sup>C-NMR spectrum of C<sub>11</sub>

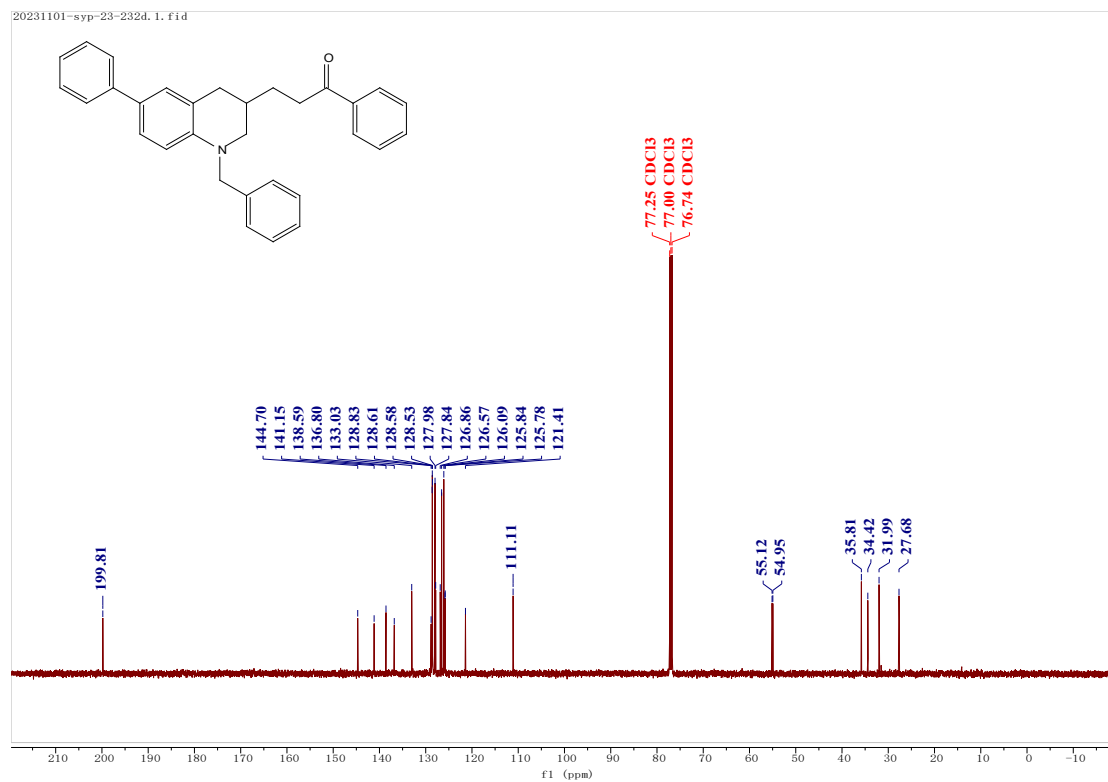

### <sup>1</sup>H-NMR spectrum of C<sub>12</sub>

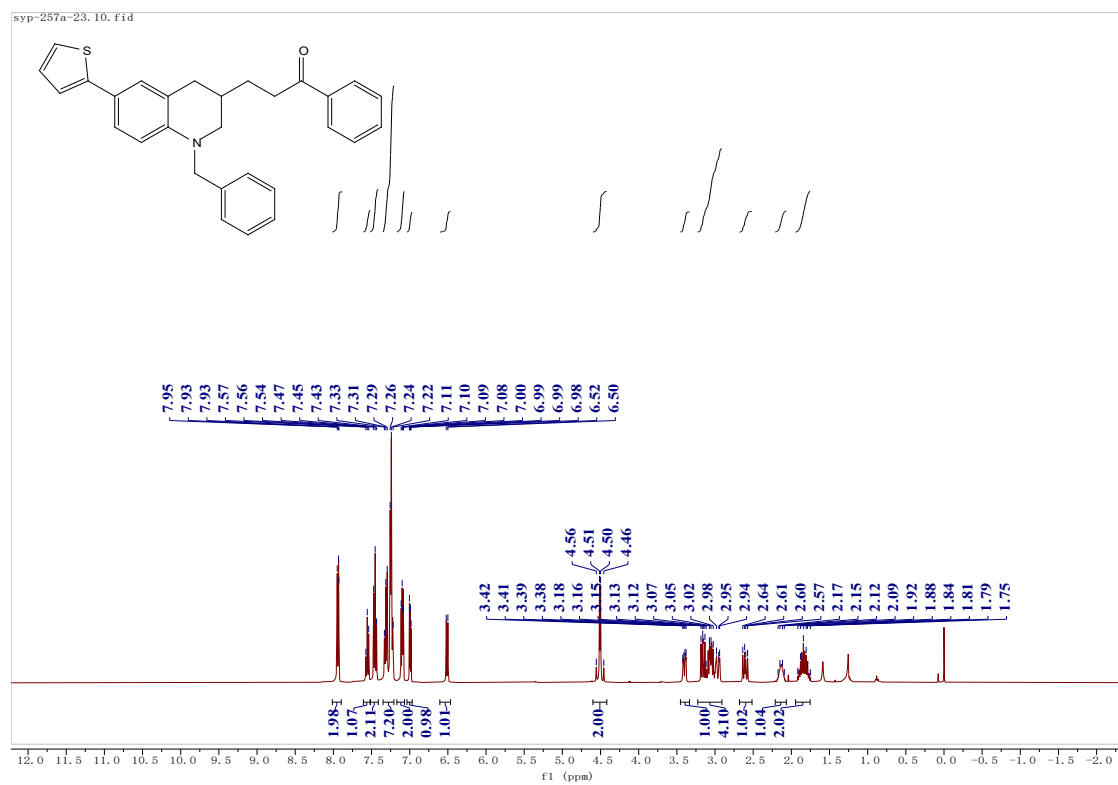

### <sup>13</sup>C-NMR spectrum of C<sub>12</sub>

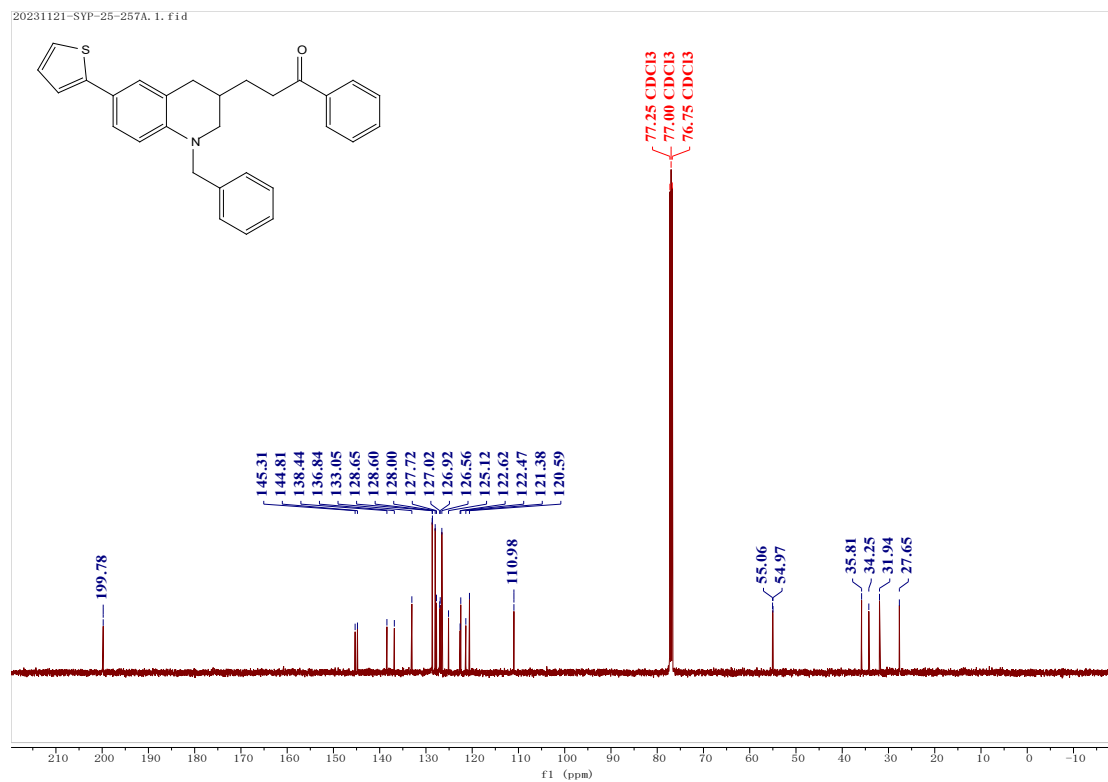

### <sup>1</sup>H-NMR spectrum of C<sub>13</sub>

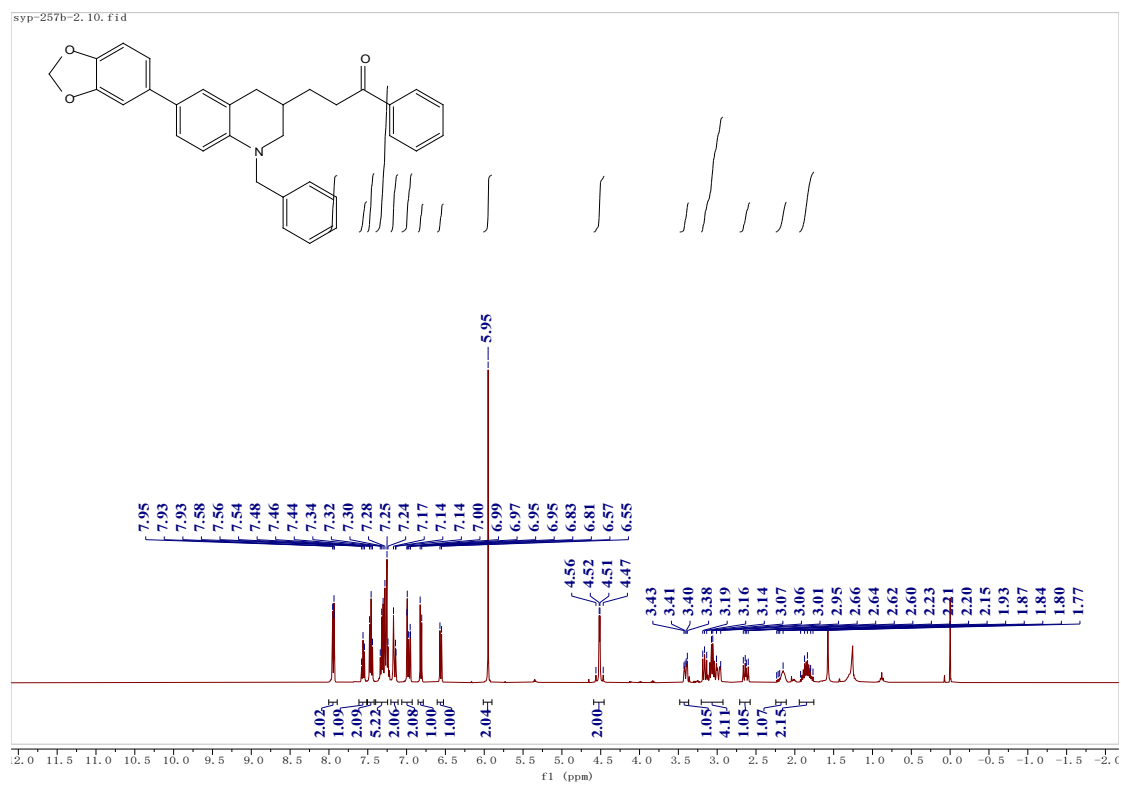

### <sup>13</sup>C-NMR spectrum of C<sub>13</sub>

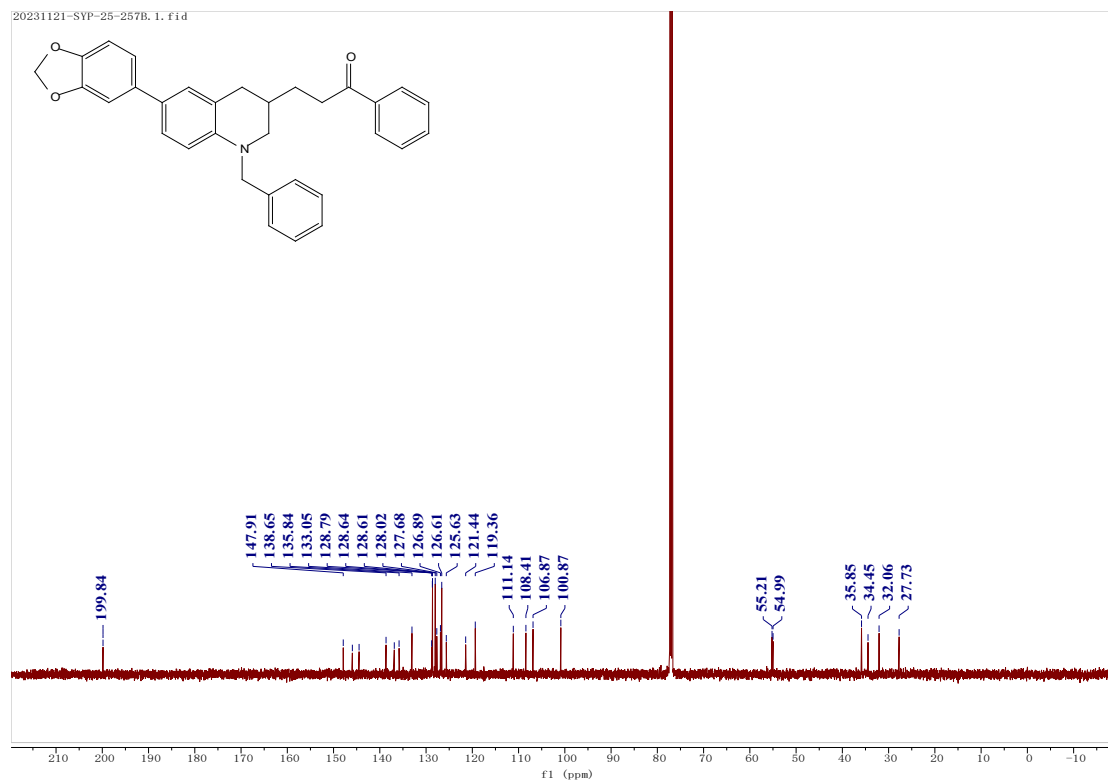

### <sup>1</sup>H-NMR spectrum of C<sub>14</sub>

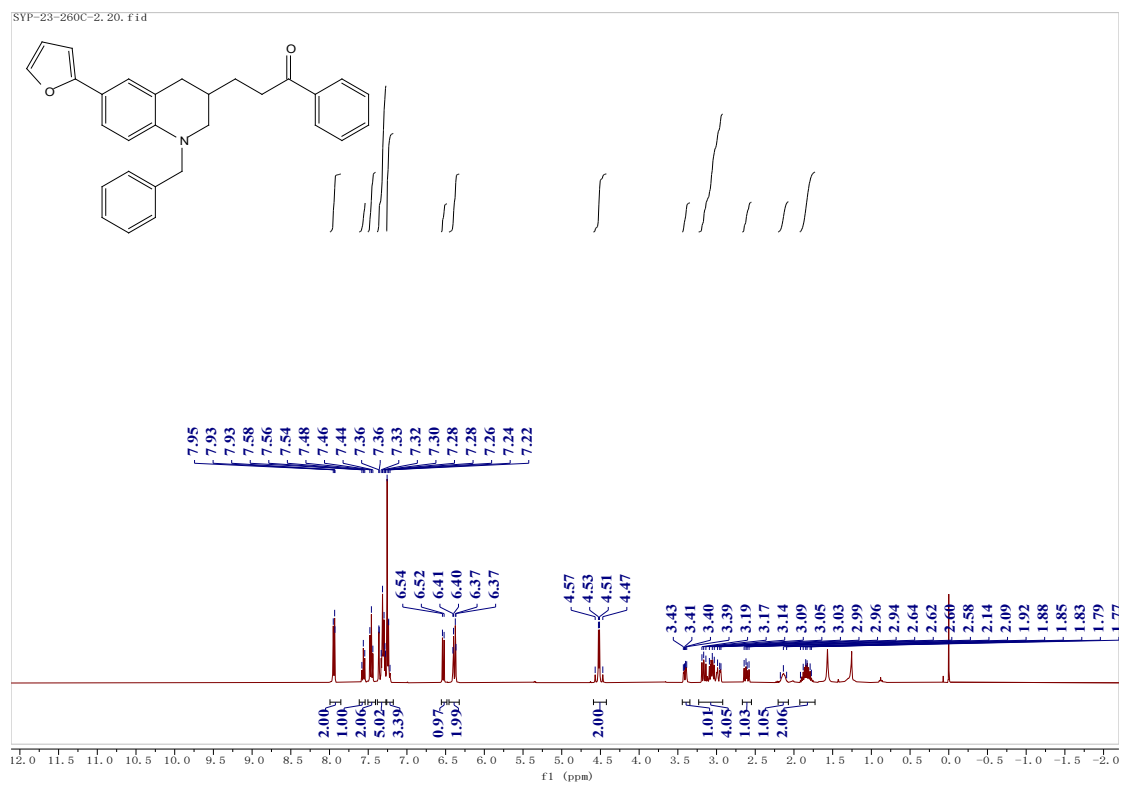

### <sup>13</sup>C-NMR spectrum of C<sub>14</sub>

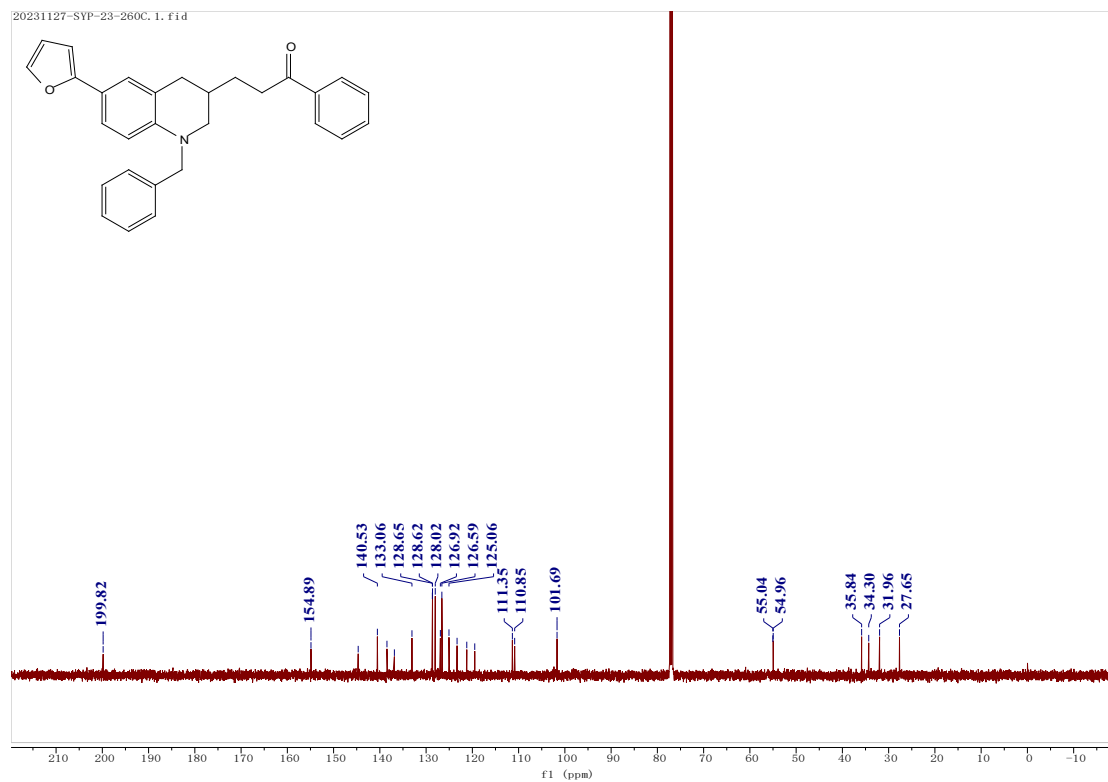

### <sup>1</sup>H-NMR spectrum of C<sub>15</sub>

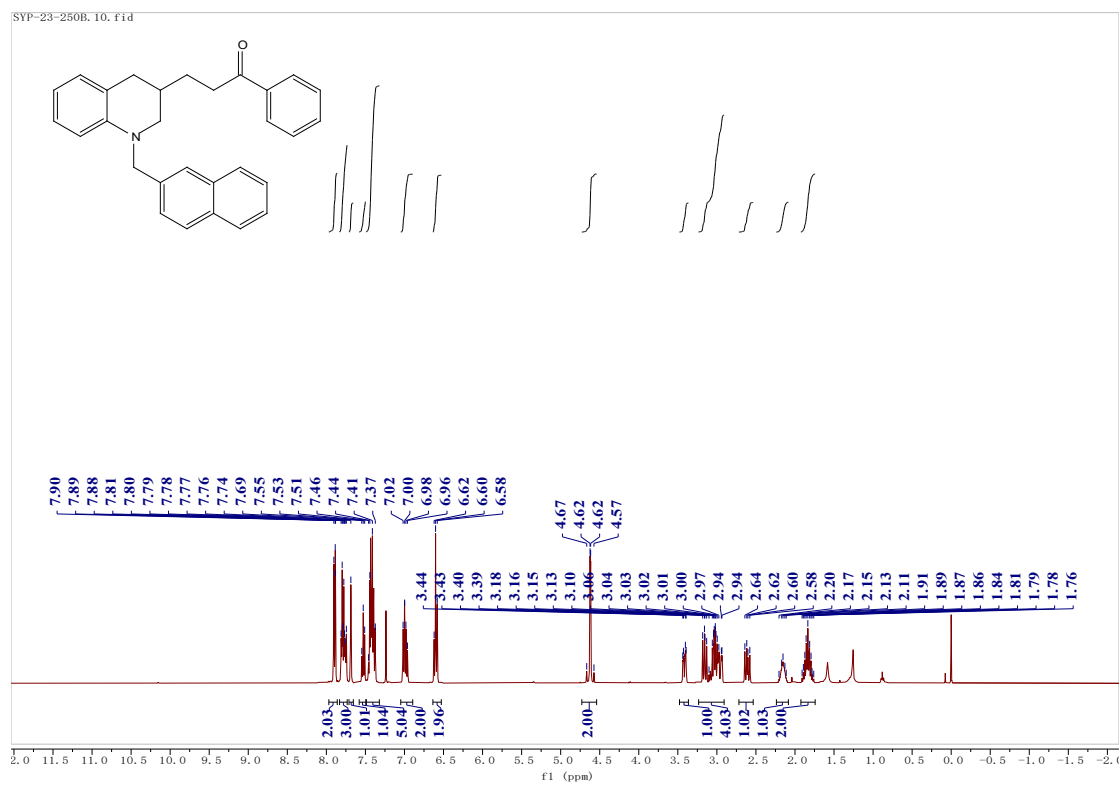



### <sup>13</sup>C-NMR spectrum of C<sub>15</sub>

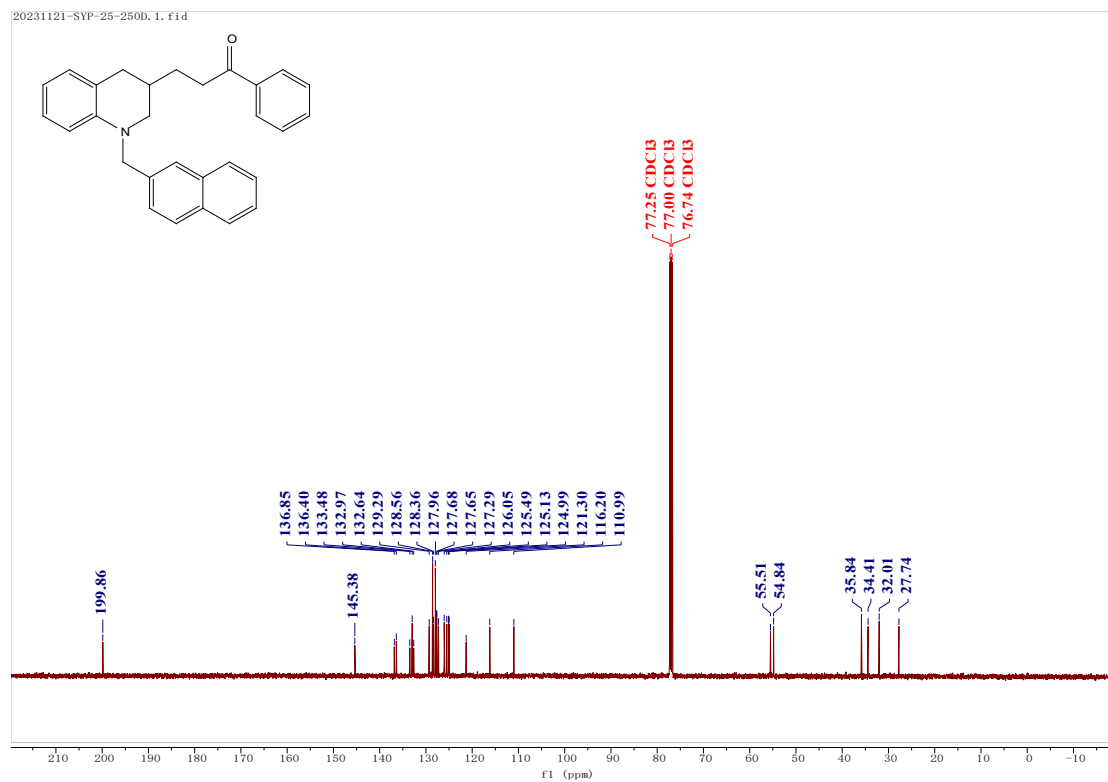

### <sup>1</sup>H-NMR spectrum of C<sub>16</sub>

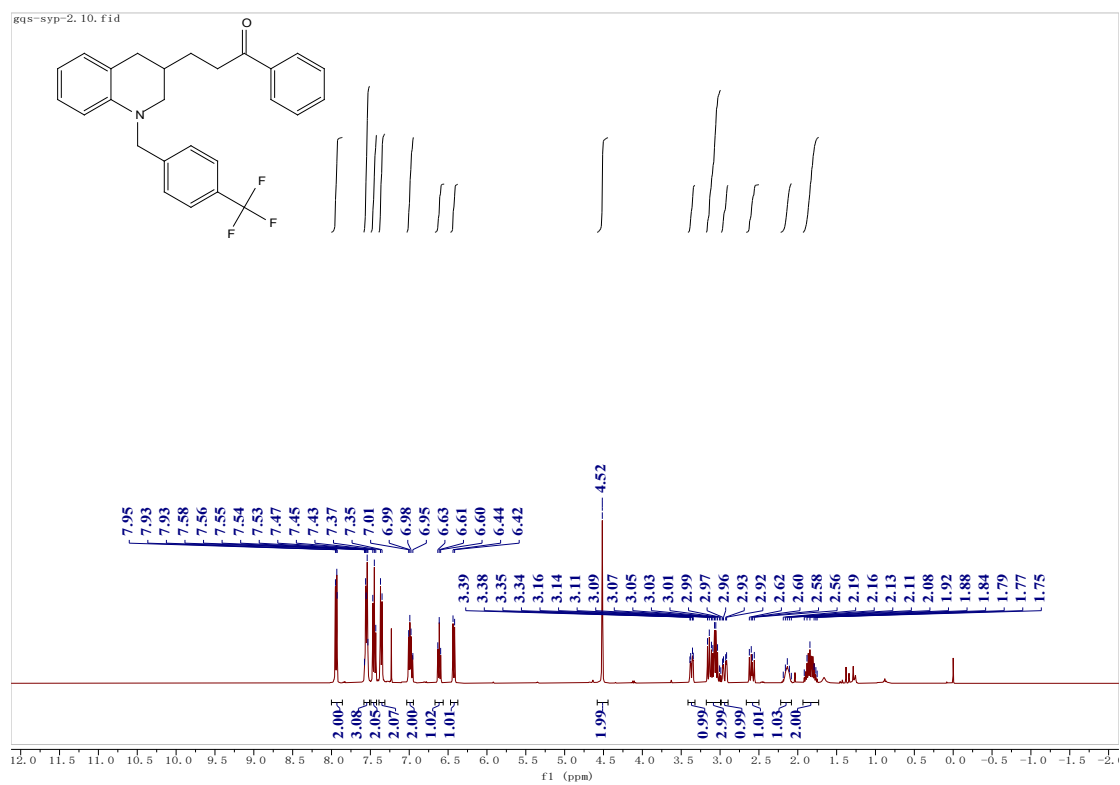

### <sup>13</sup>C-NMR spectrum of C<sub>16</sub>

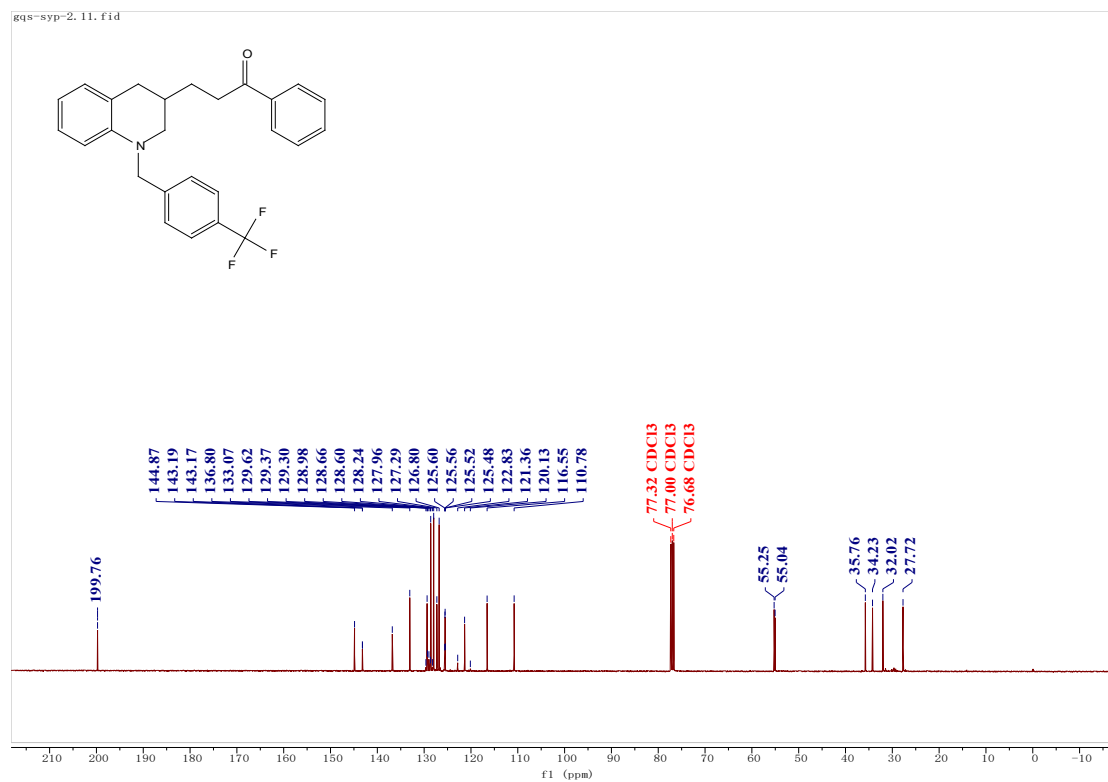

### <sup>19</sup>F-NMR spectrum of C<sub>17</sub>

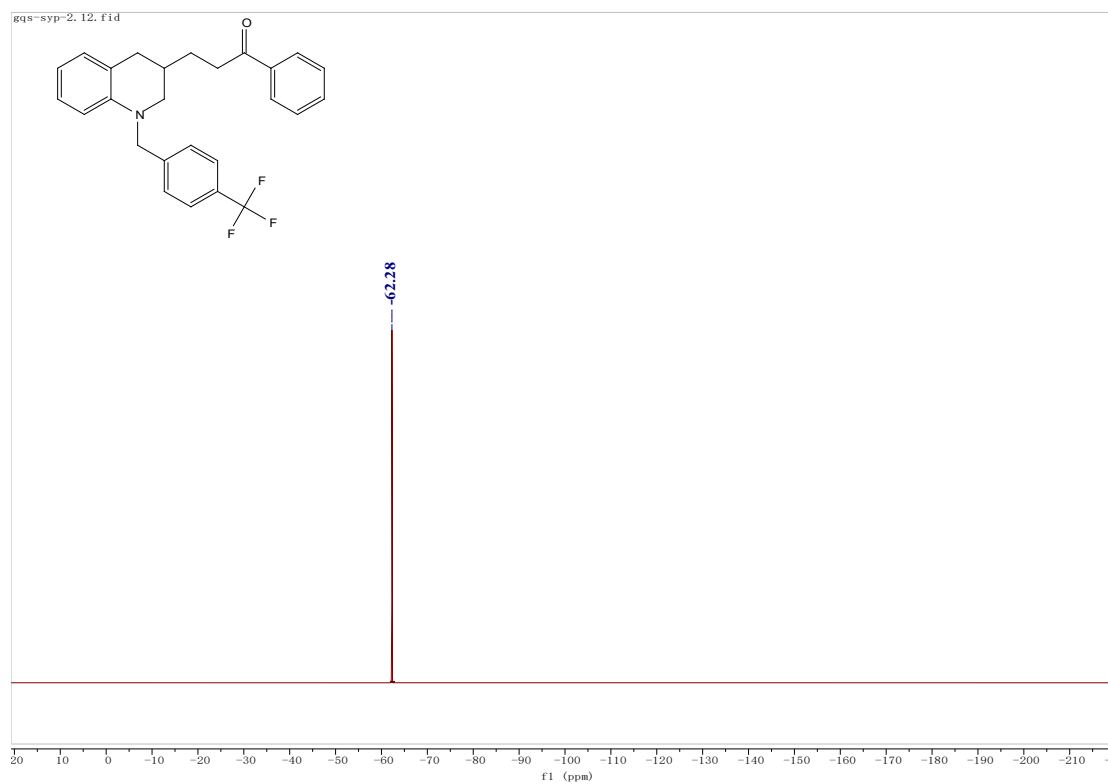

### <sup>1</sup>H-NMR spectrum of C<sub>17</sub>

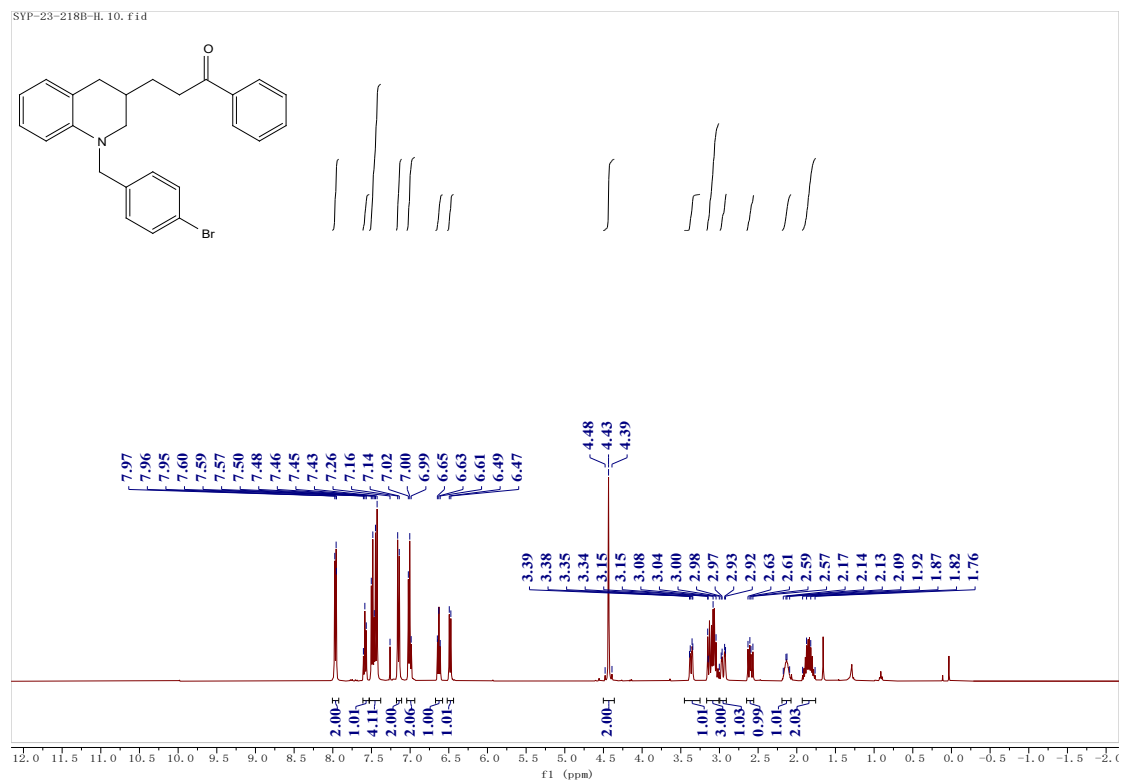

### <sup>13</sup>C-NMR spectrum of C<sub>17</sub>

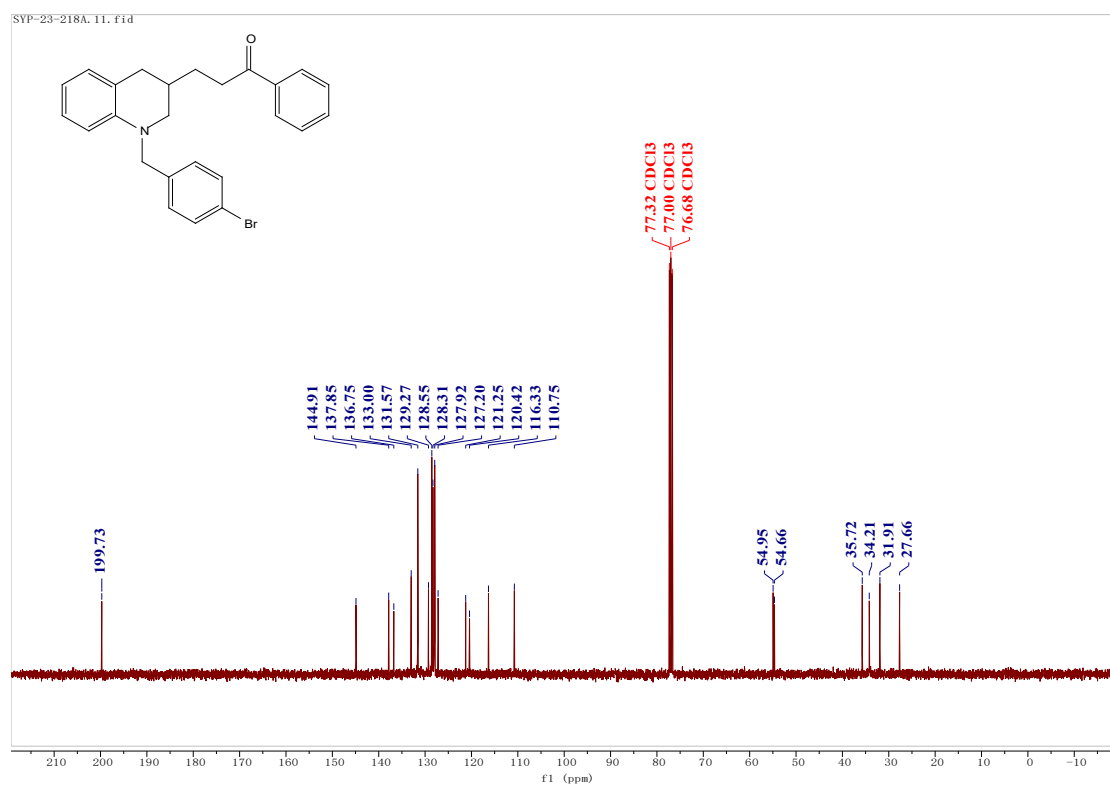

### <sup>1</sup>H-NMR spectrum of C<sub>18</sub>

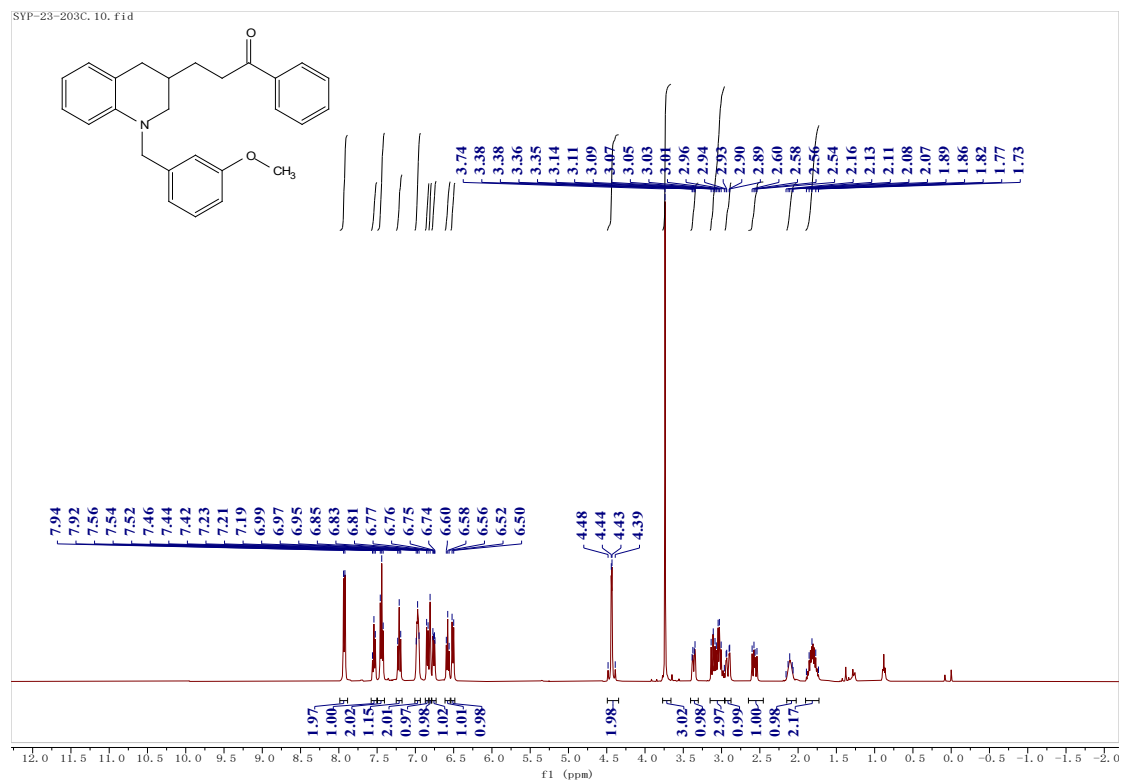

### <sup>13</sup>C-NMR spectrum of C<sub>18</sub>

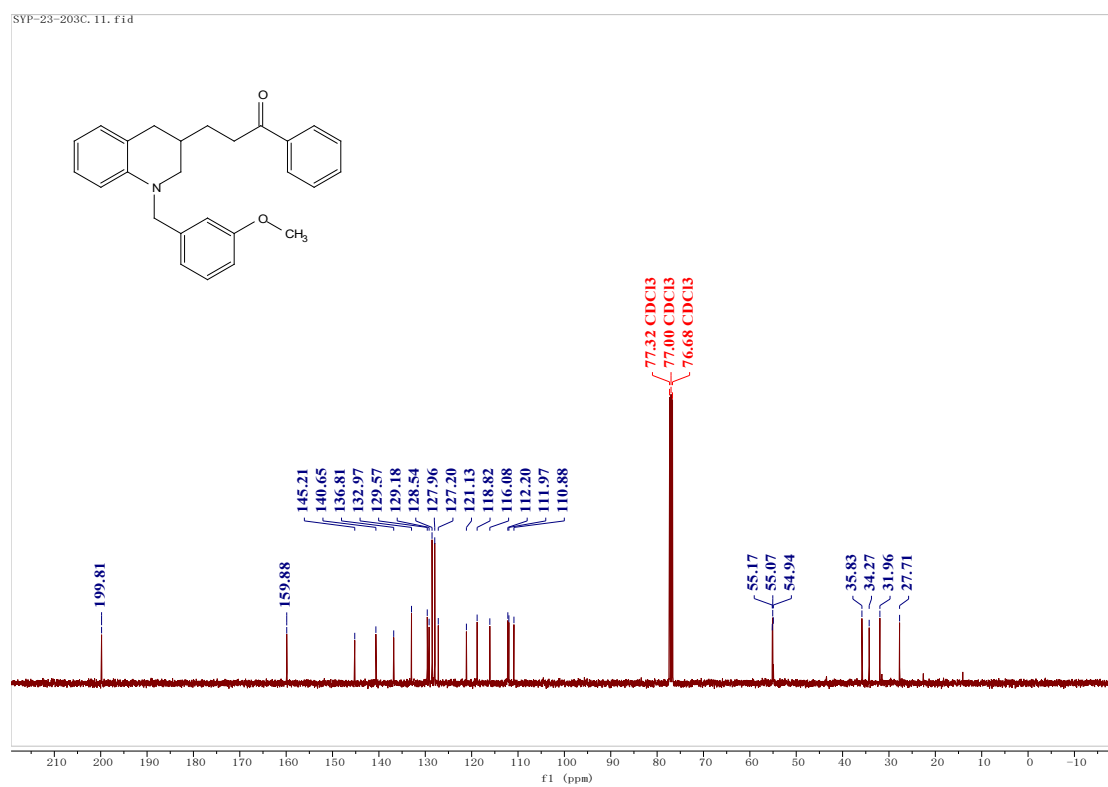

# <sup>1</sup>H-NMR spectrum of C<sub>19</sub>

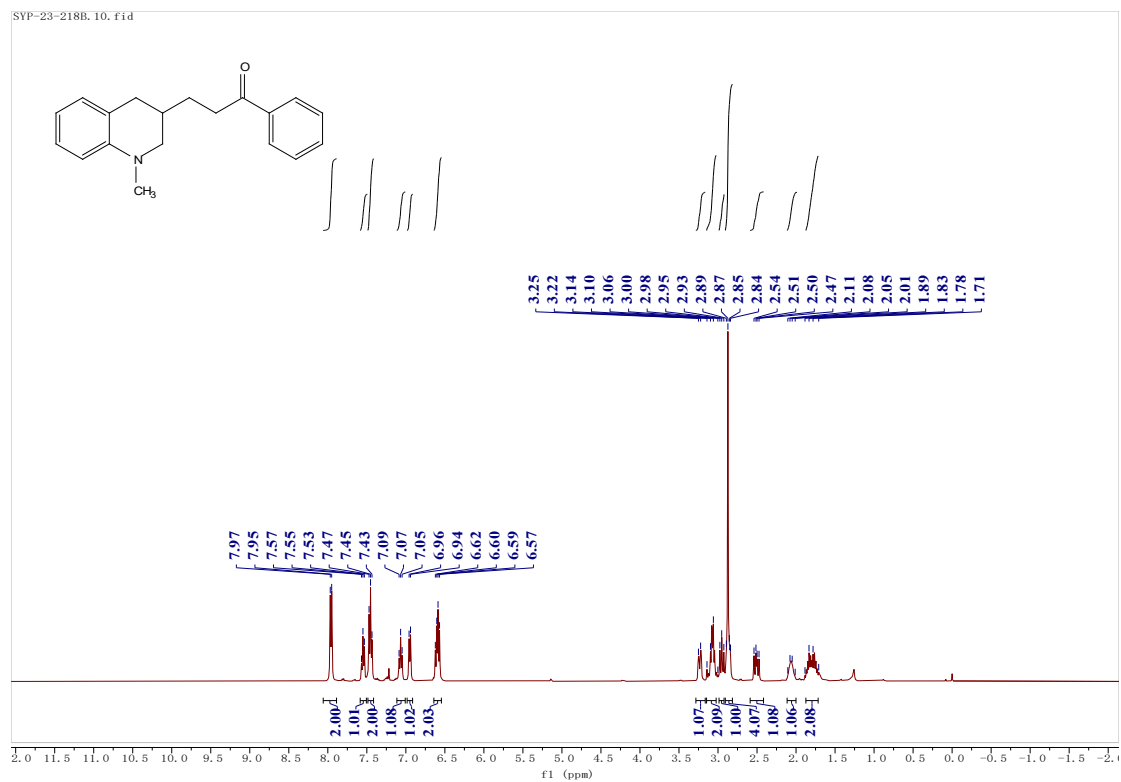

# <sup>13</sup>C-NMR spectrum of C<sub>19</sub>

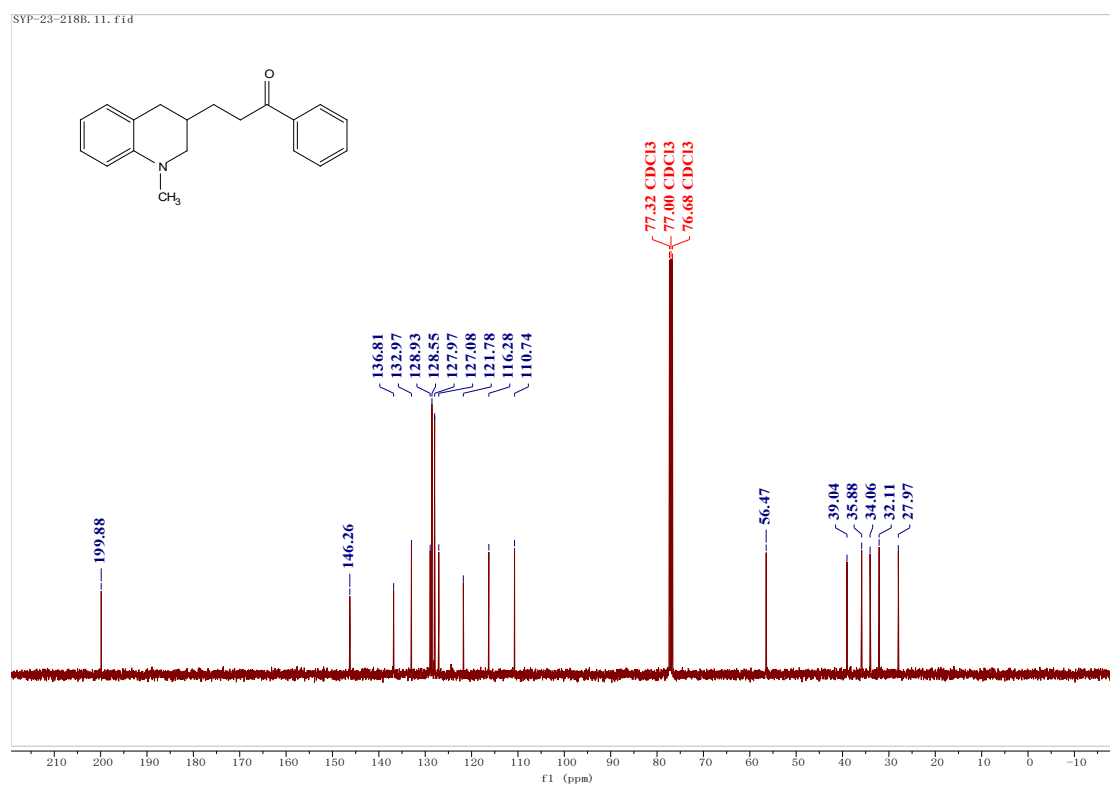

# <sup>1</sup>H-NMR spectrum of C<sub>20</sub>

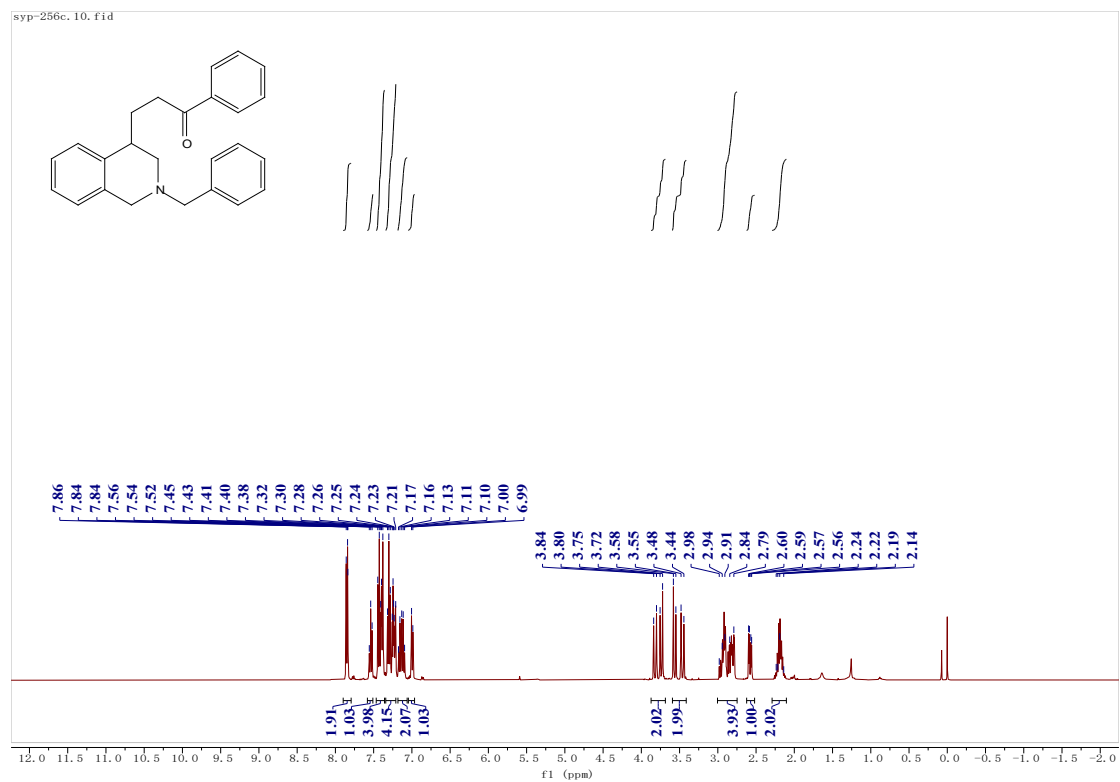

# <sup>13</sup>C-NMR spectrum of C<sub>20</sub>

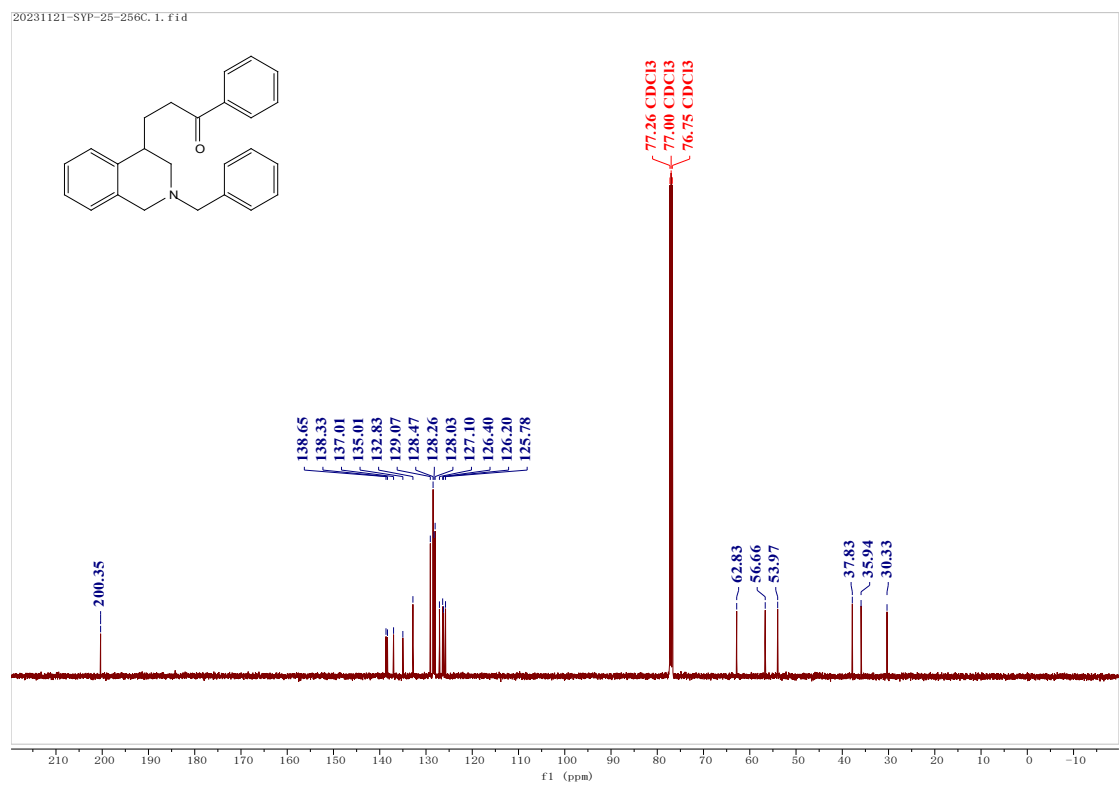

# <sup>1</sup>H-NMR spectrum of C<sub>21</sub>

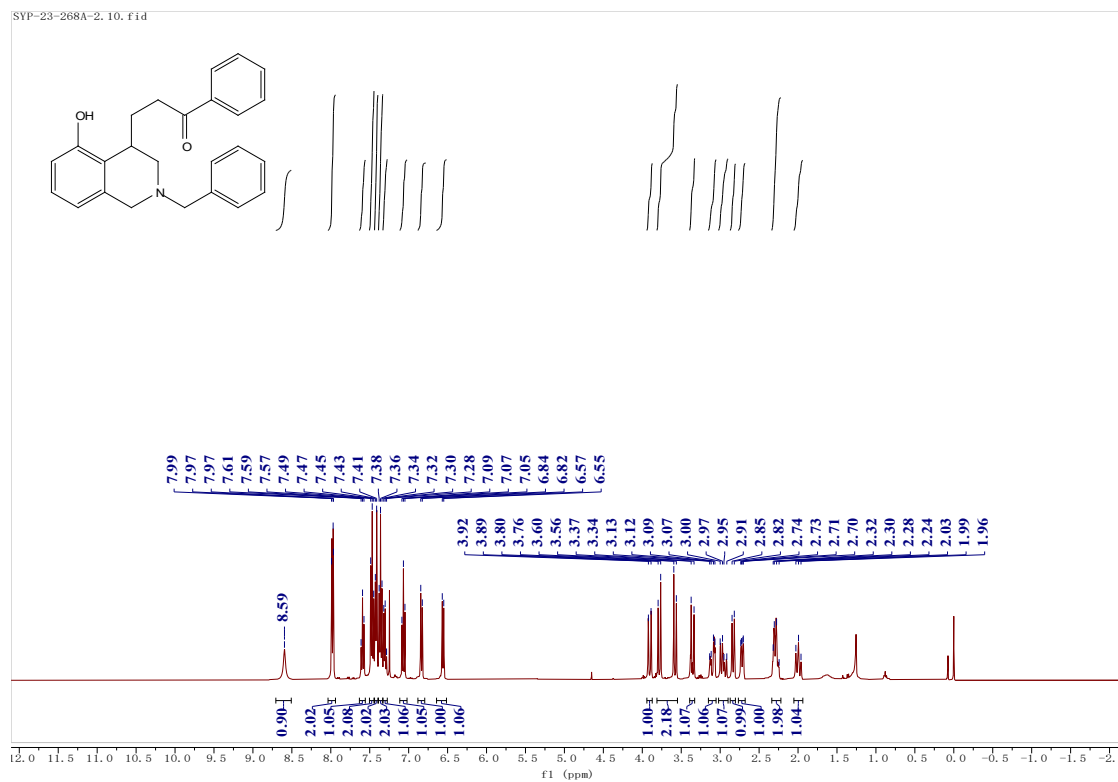

# <sup>13</sup>C-NMR spectrum of C<sub>21</sub>

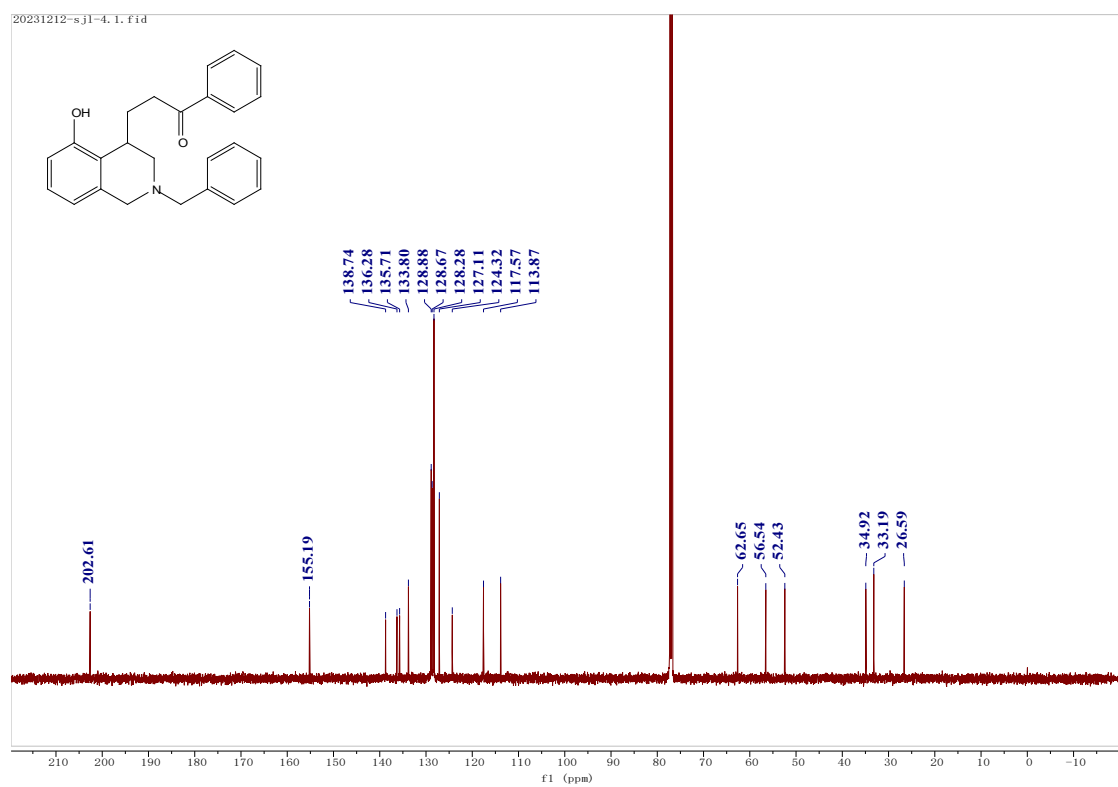

# <sup>1</sup>H-NMR spectrum of C<sub>22</sub>

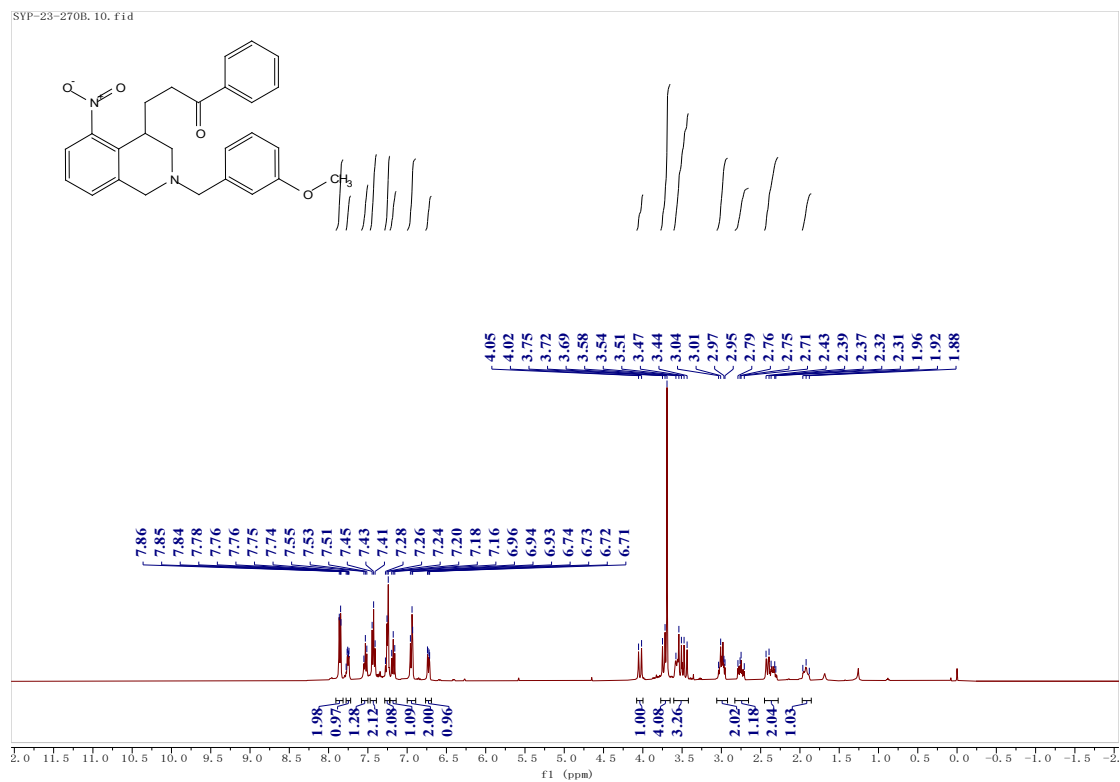

# <sup>13</sup>C-NMR spectrum of C<sub>22</sub>

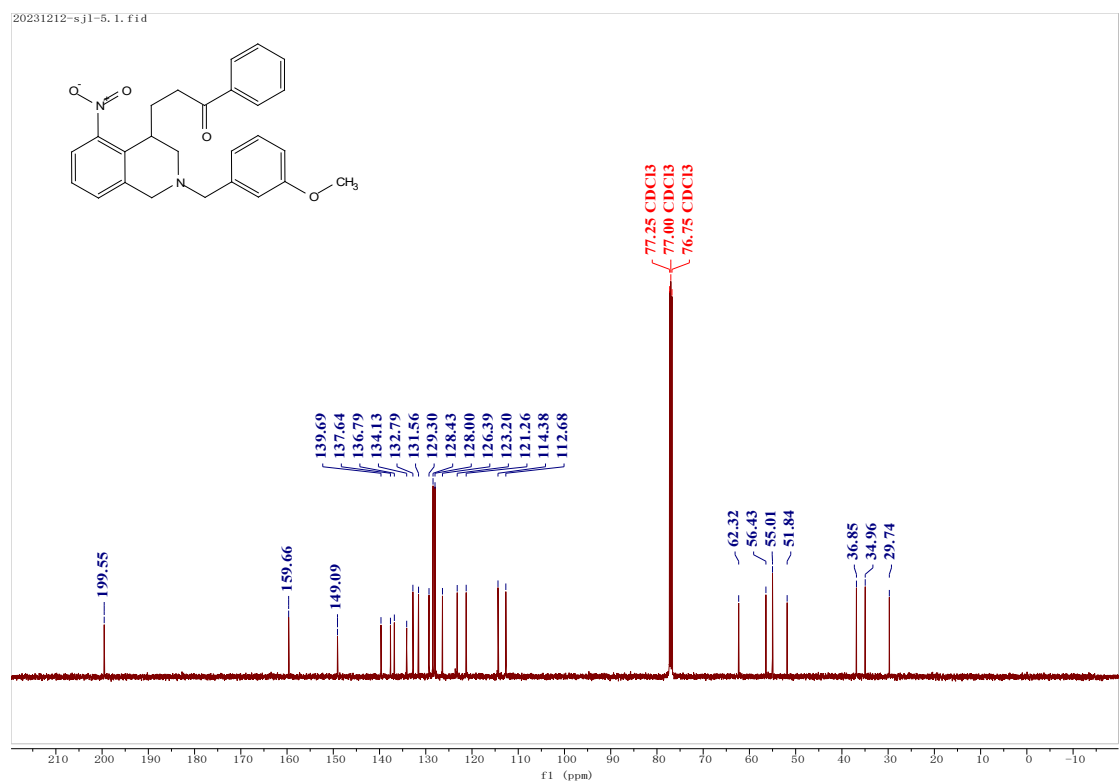



### <sup>1</sup>H-NMR spectrum of C<sub>23</sub>

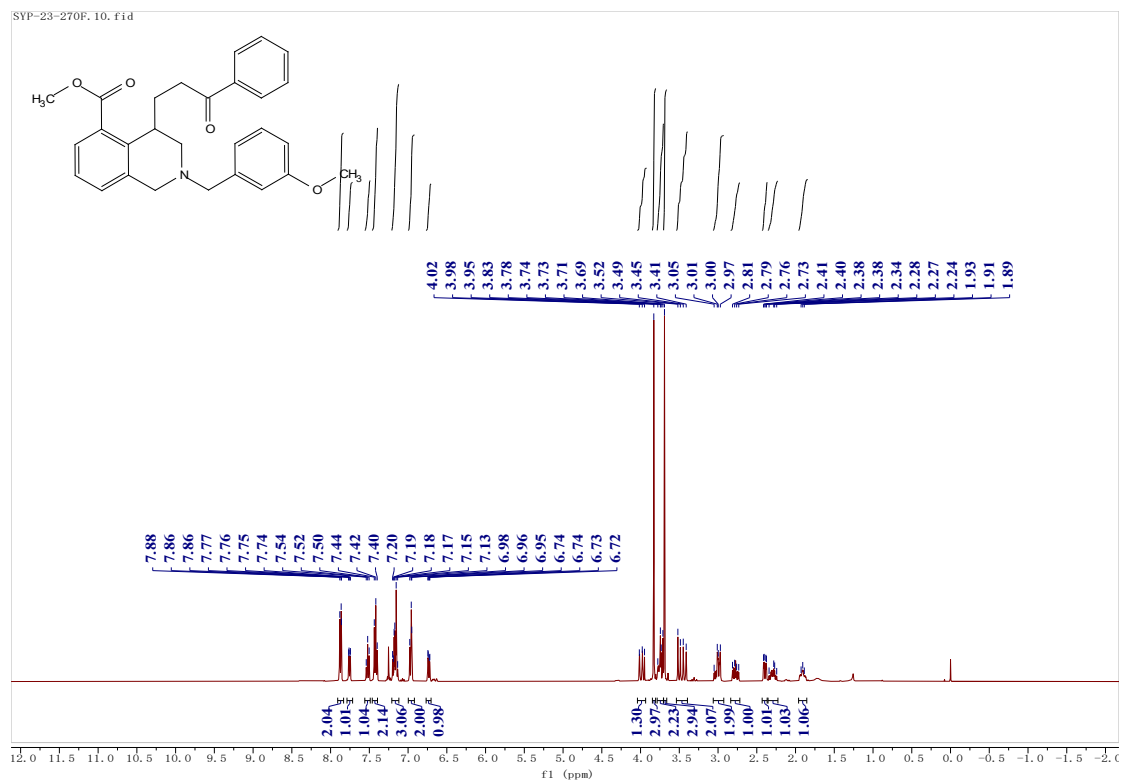

### <sup>13</sup>C-NMR spectrum of C<sub>23</sub>

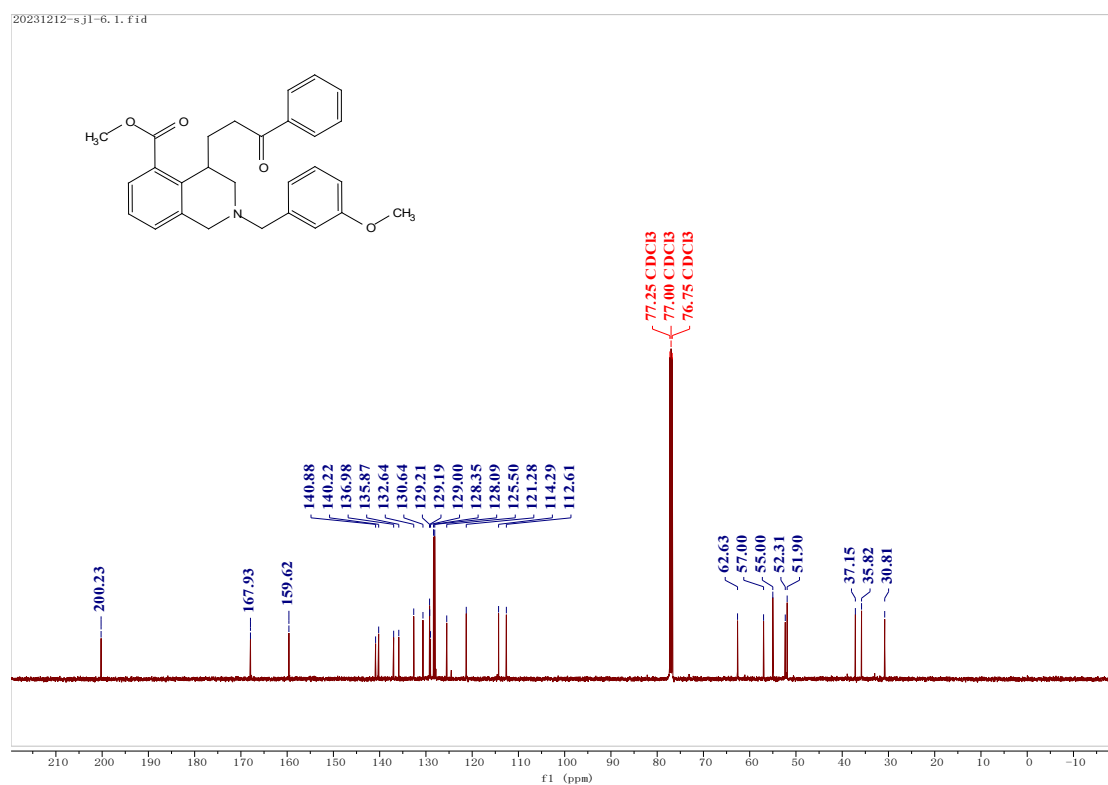

# <sup>1</sup>H-NMR spectrum of C<sub>24</sub>

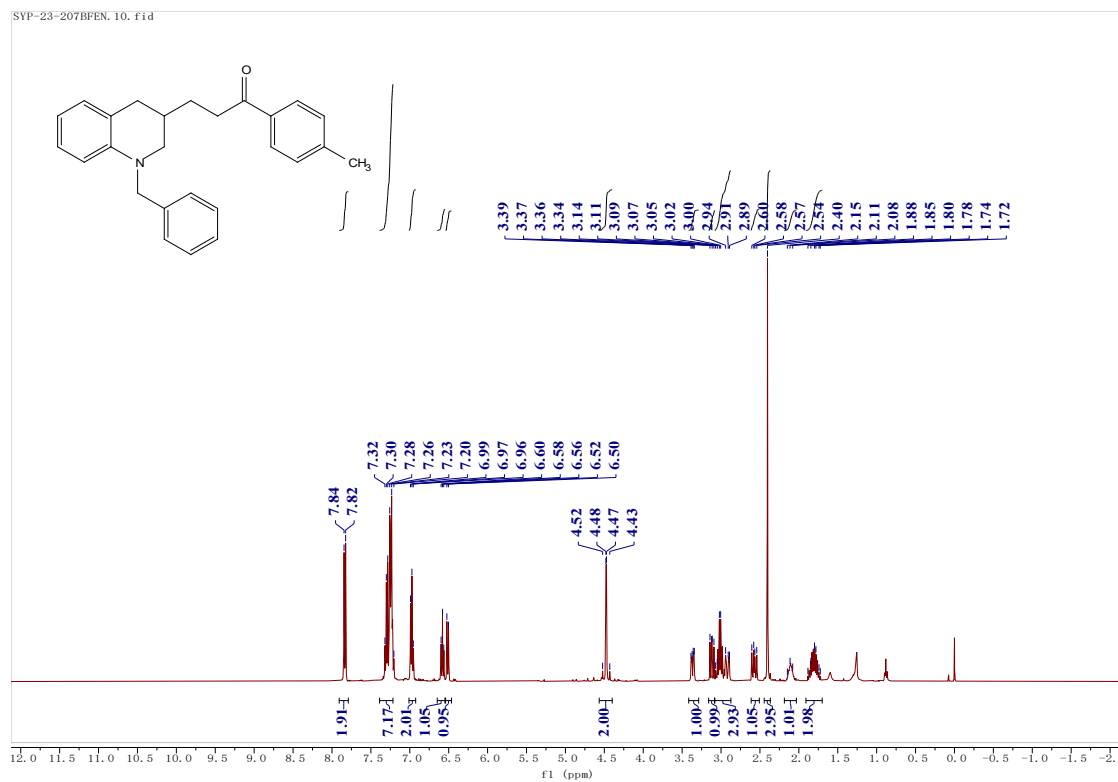

# <sup>13</sup>C-NMR spectrum of C<sub>24</sub>

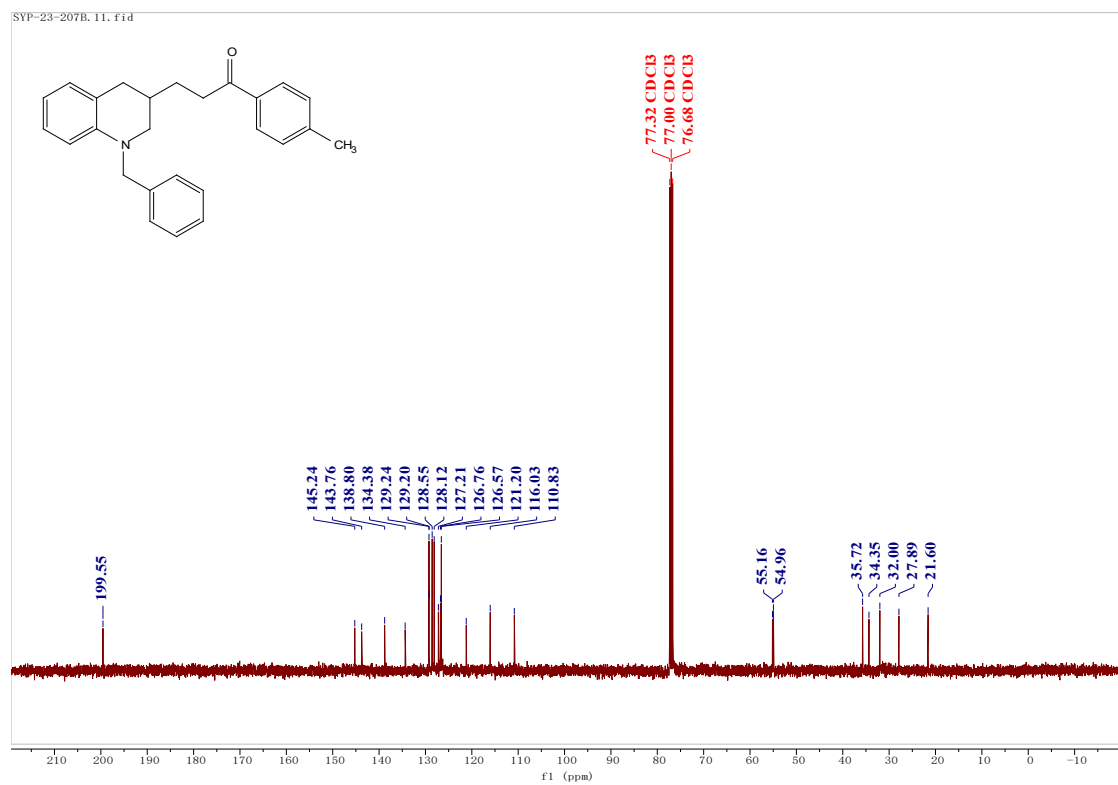

# <sup>1</sup>H-NMR spectrum of C<sub>25</sub>

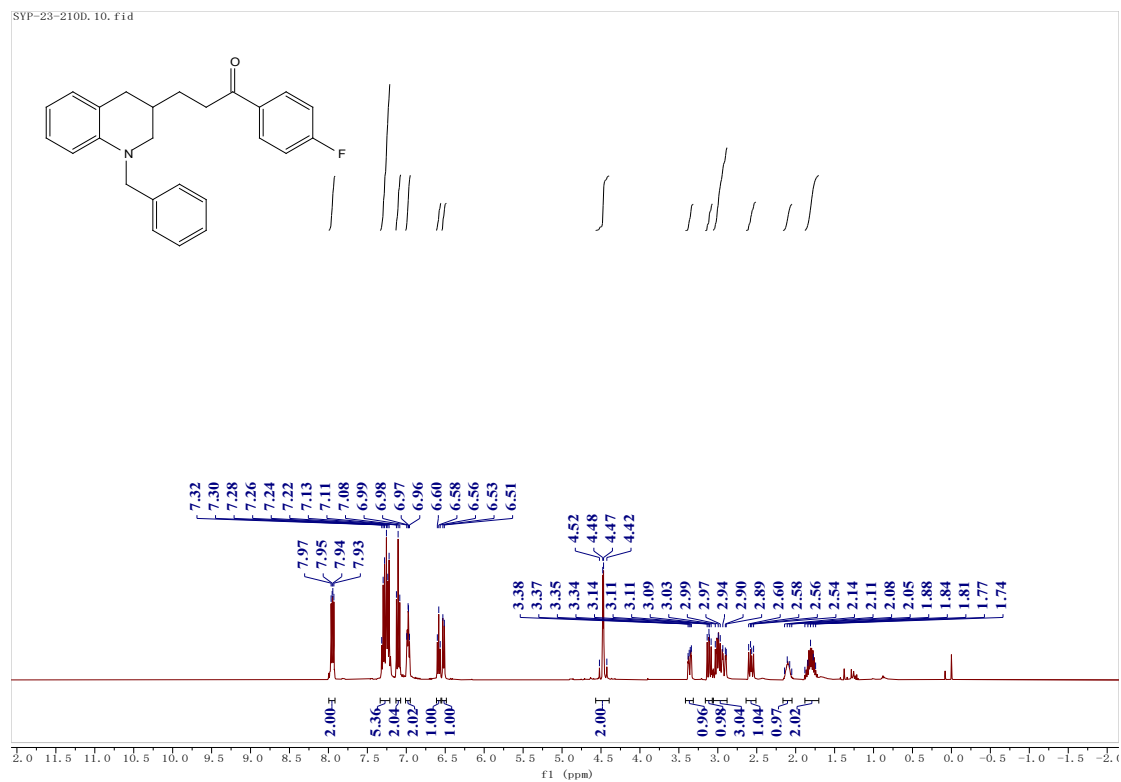

# <sup>13</sup>C-NMR spectrum of C<sub>25</sub>

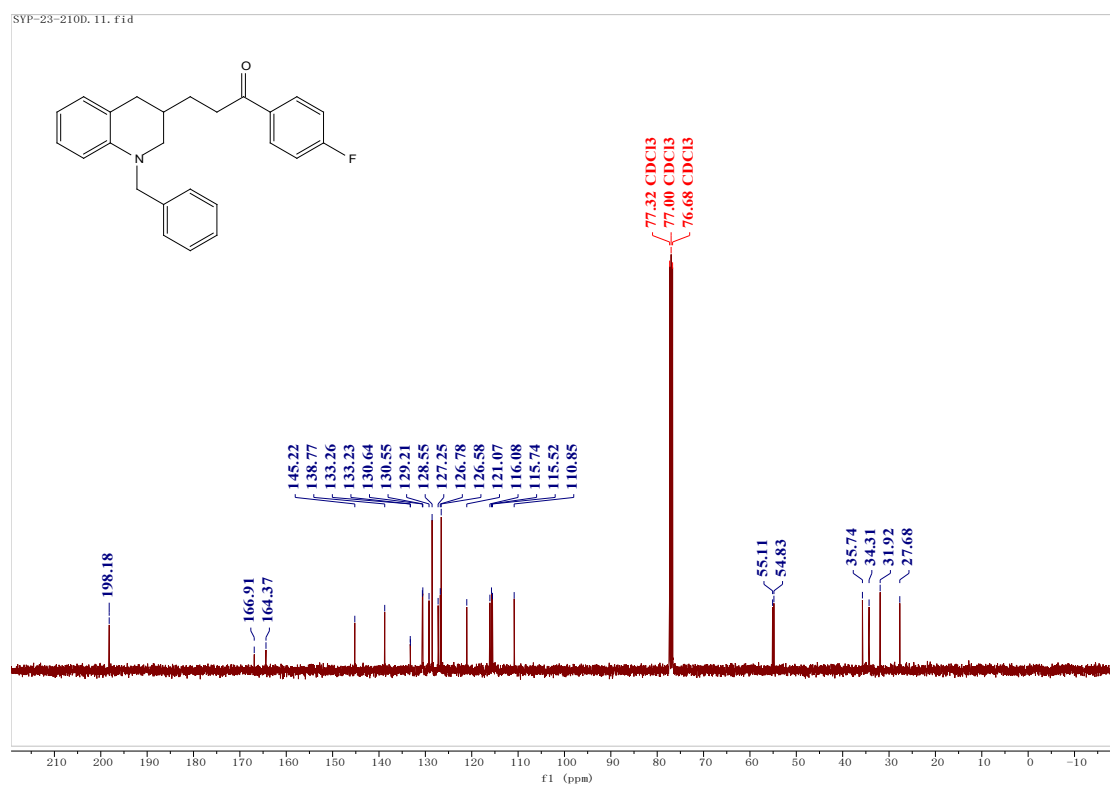

## <sup>19</sup>F-NMR spectrum of C<sub>25</sub>

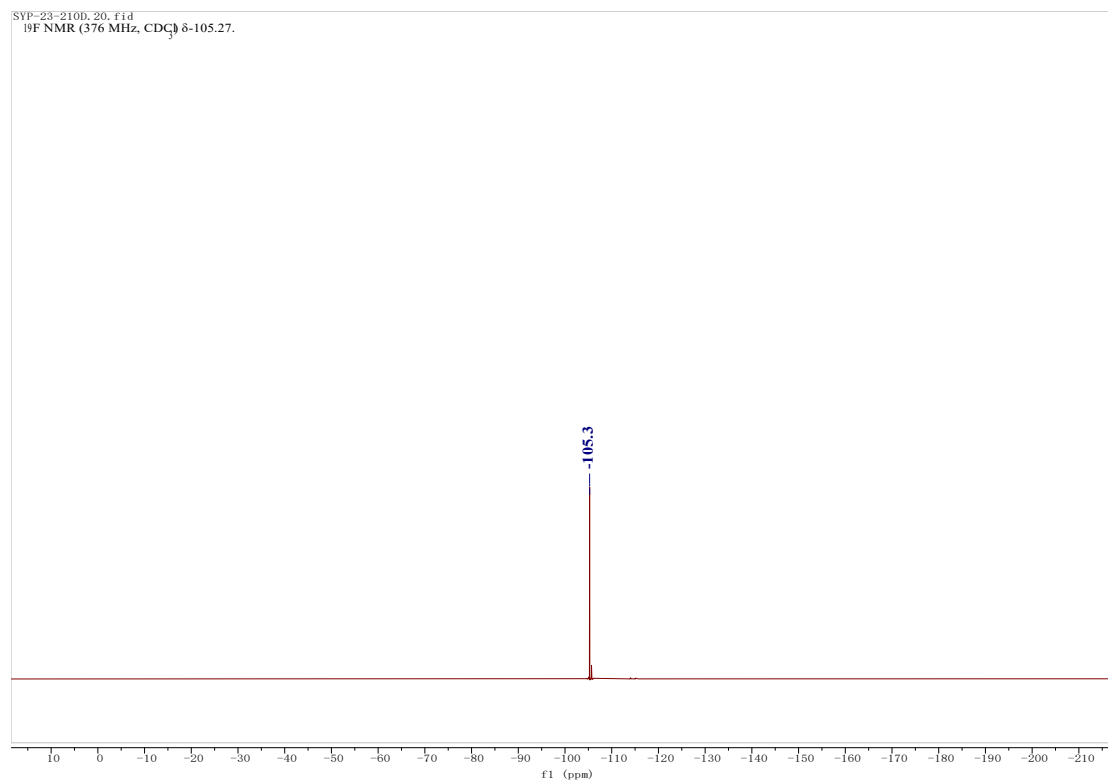

## <sup>1</sup>H-NMR spectrum of C<sub>26</sub>

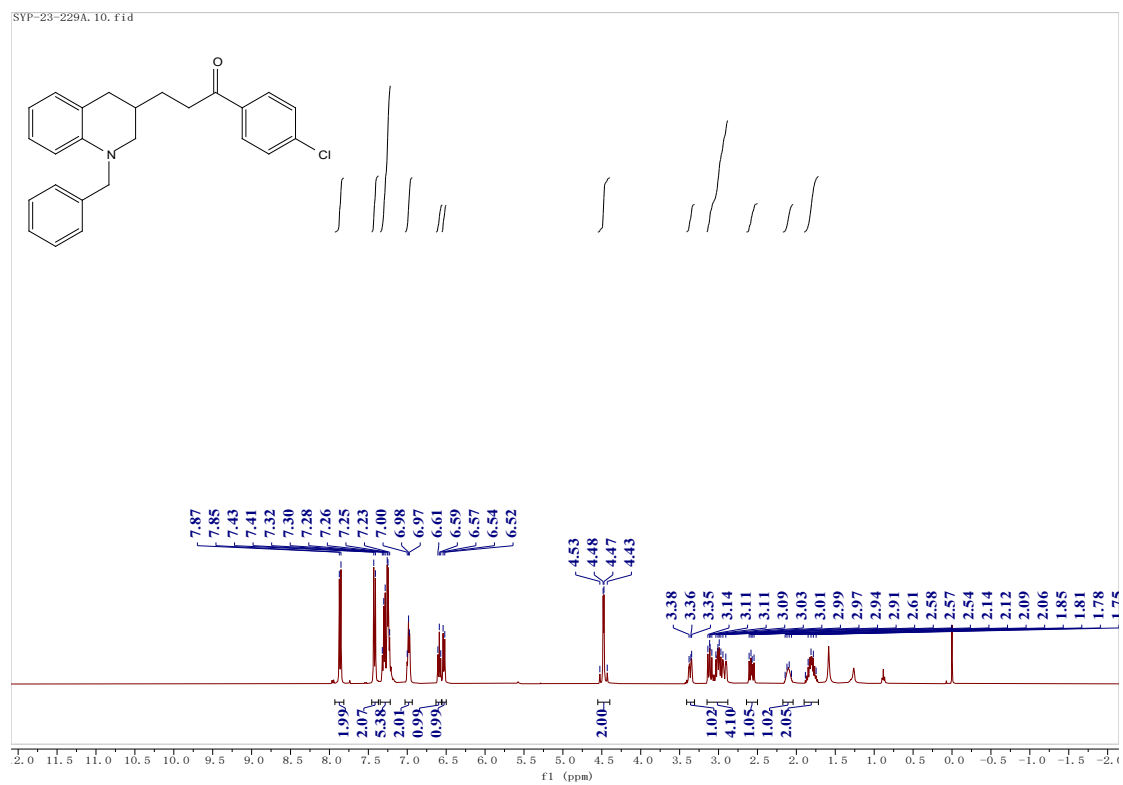

### <sup>13</sup>C-NMR spectrum of C<sub>26</sub>

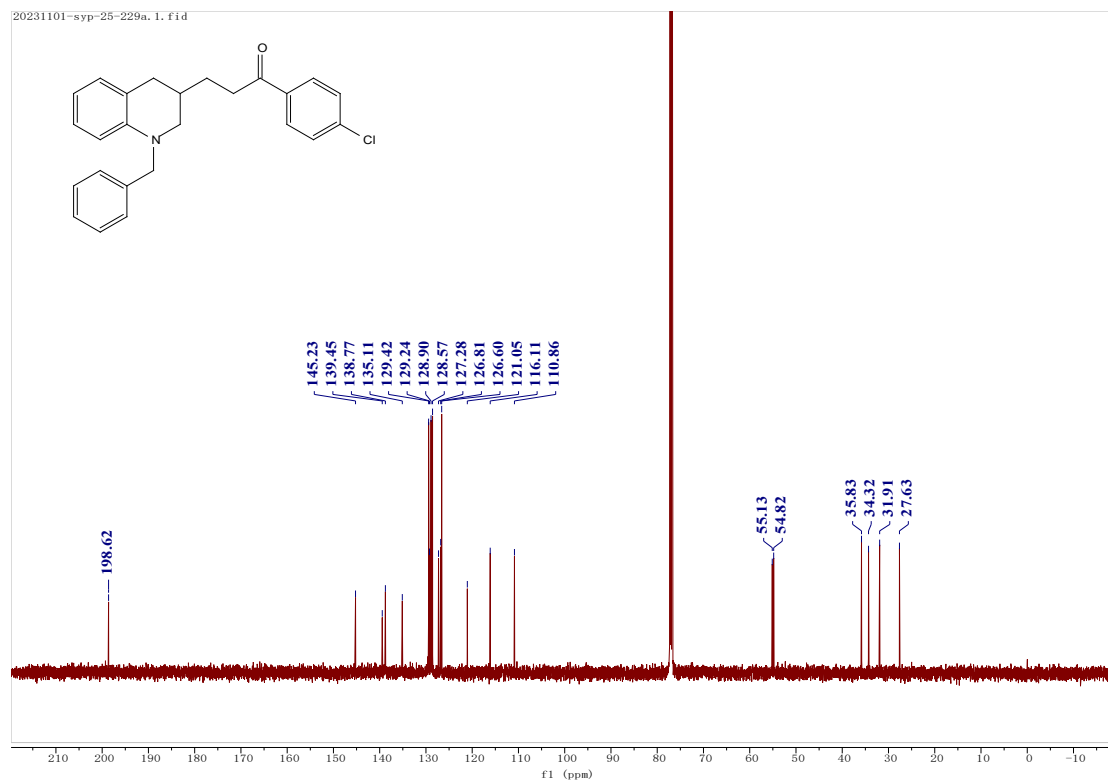

### <sup>1</sup>H-NMR spectrum of C<sub>27</sub>

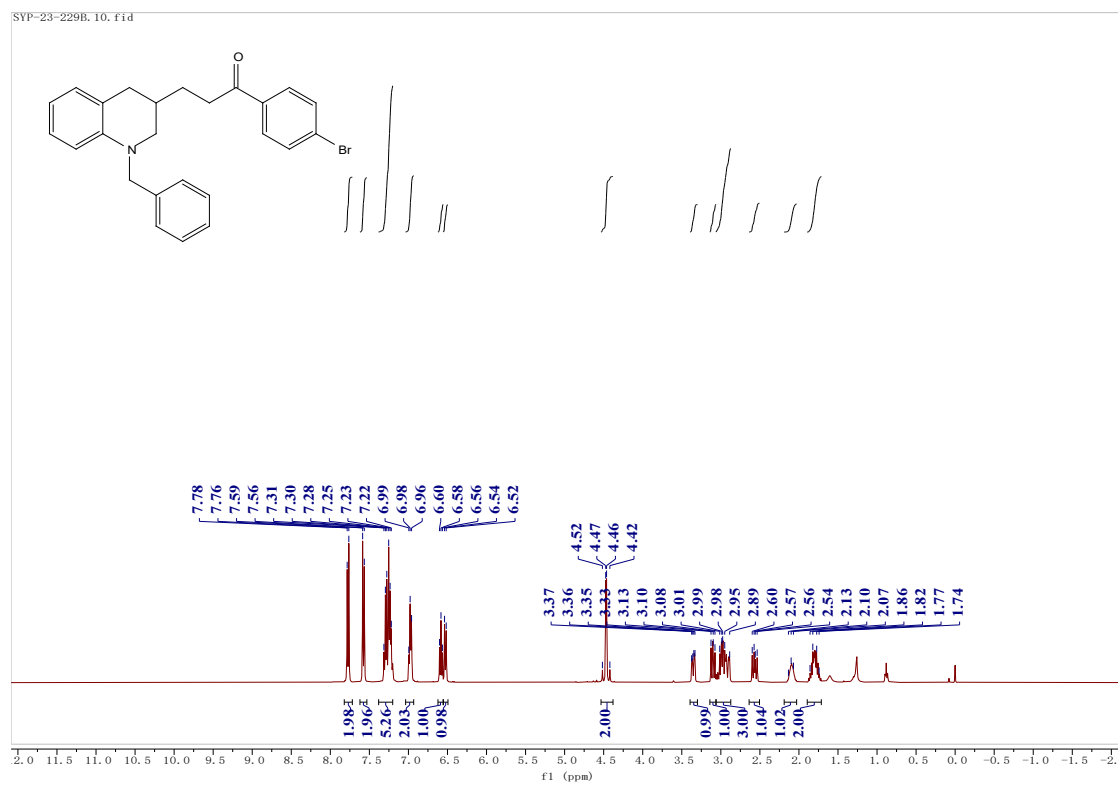

### <sup>13</sup>C-NMR spectrum of C<sub>27</sub>

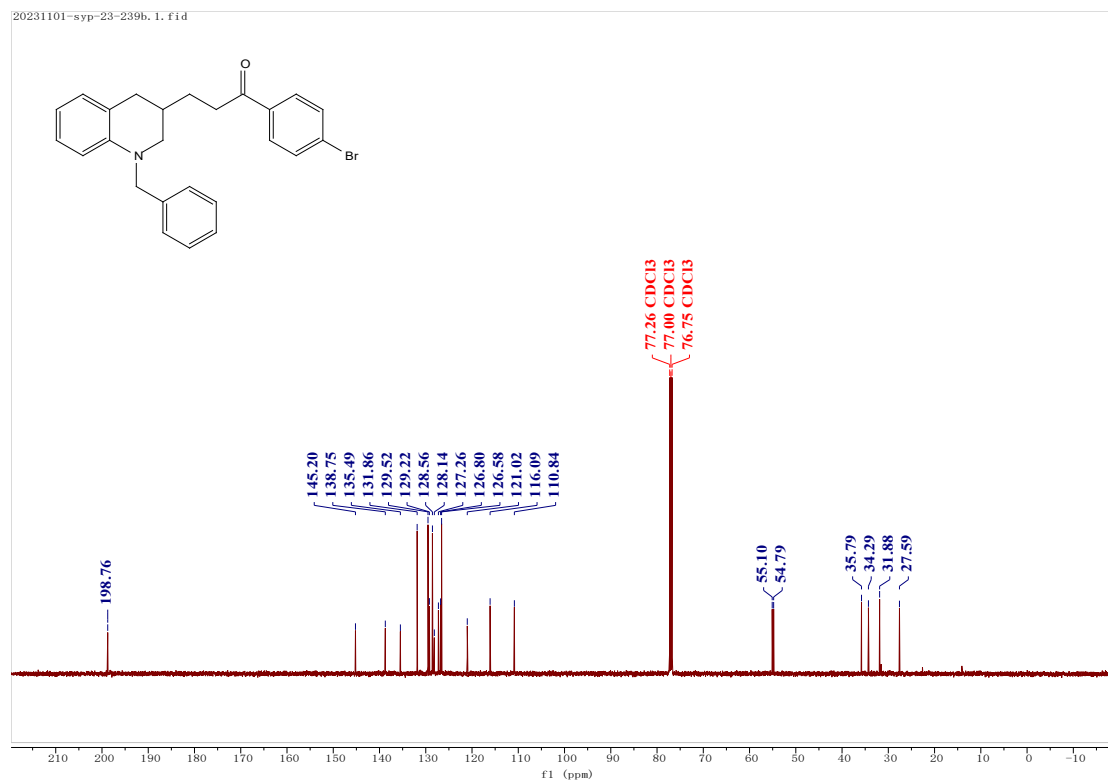

### <sup>1</sup>H-NMR spectrum of C<sub>28</sub>

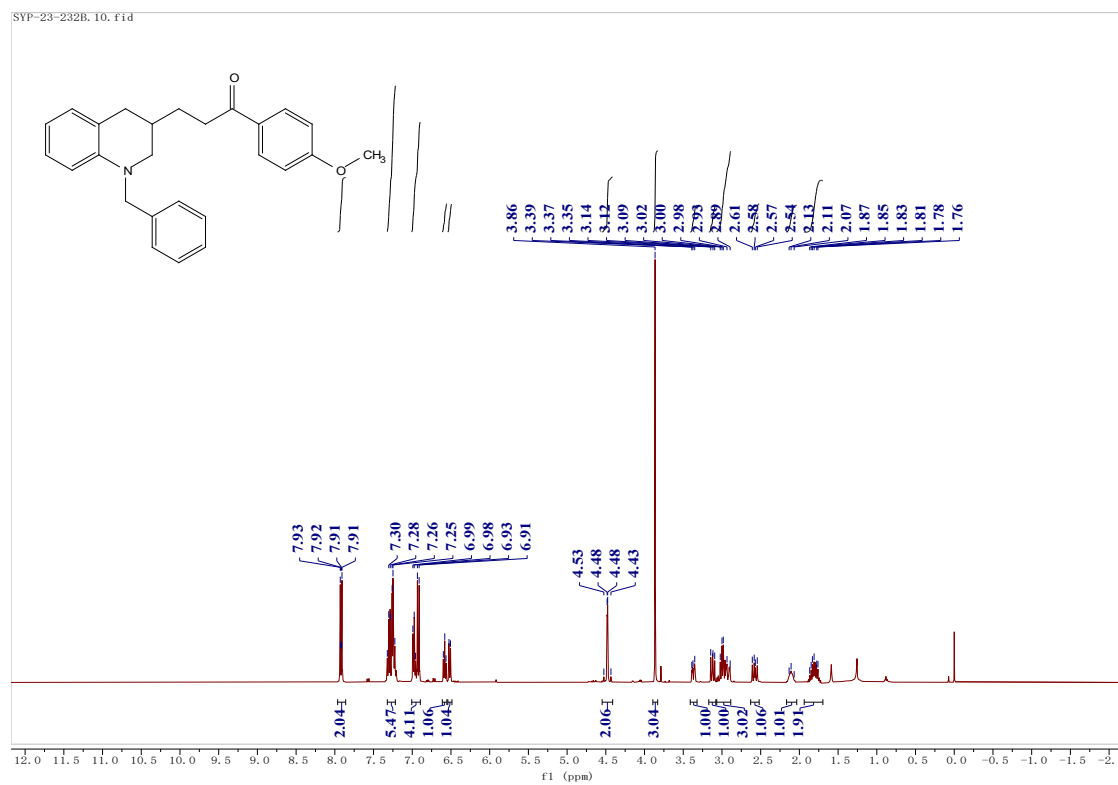

### <sup>13</sup>C-NMR spectrum of C<sub>28</sub>

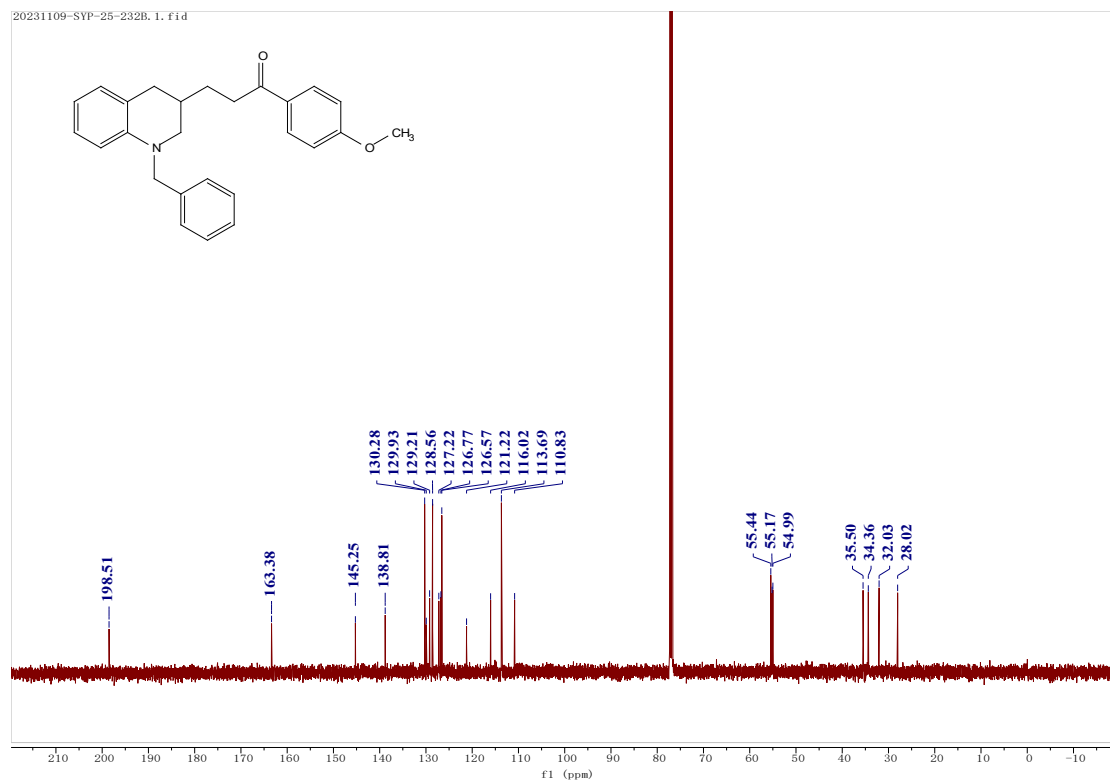

### <sup>1</sup>H-NMR spectrum of C<sub>29</sub>

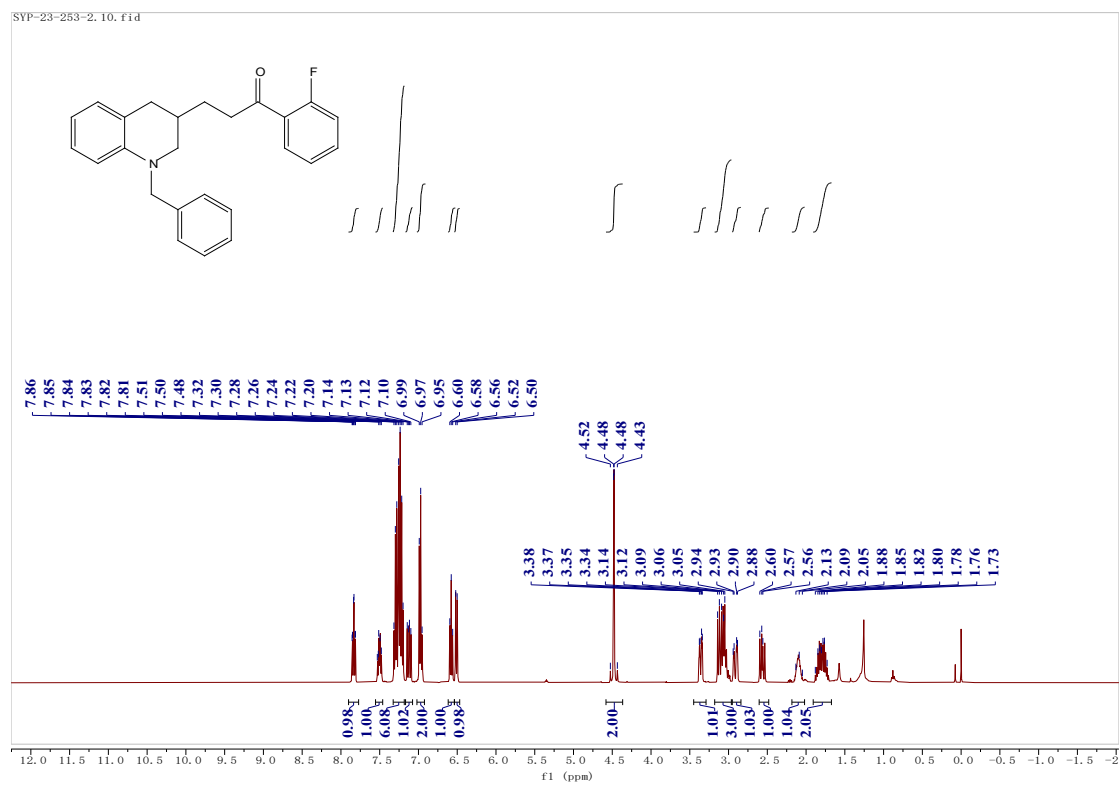

### <sup>13</sup>C-NMR spectrum of C<sub>29</sub>

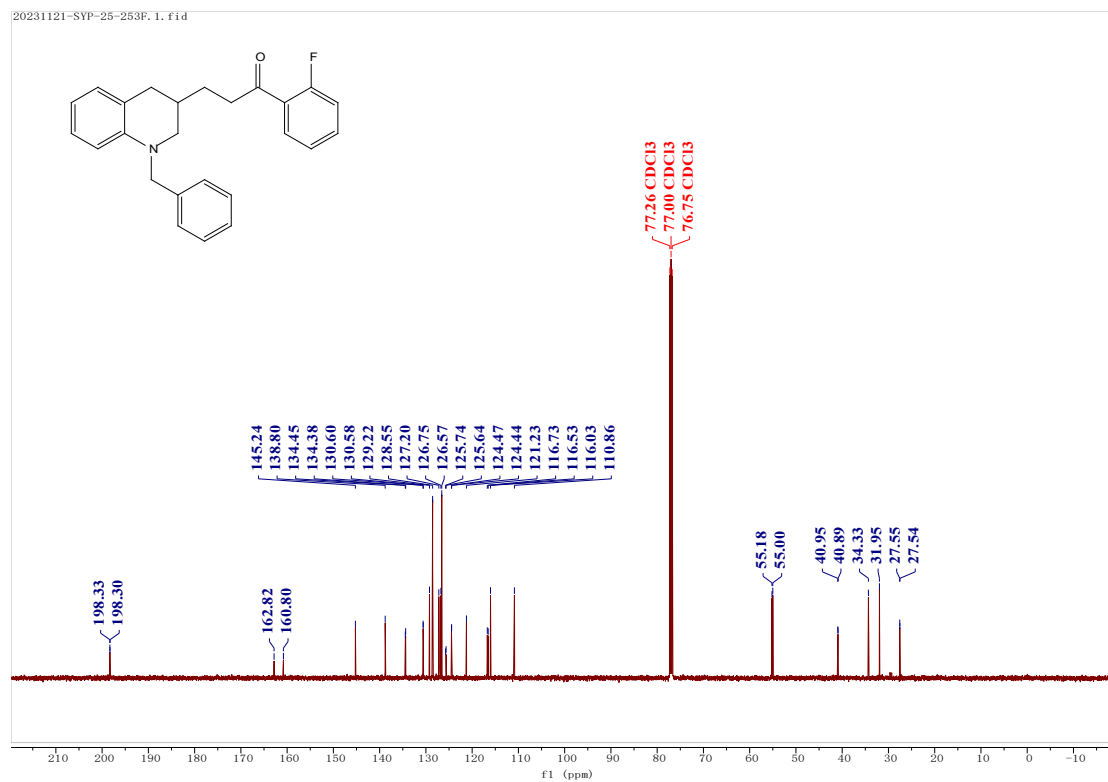

### <sup>1</sup>H-NMR spectrum of C<sub>29</sub>

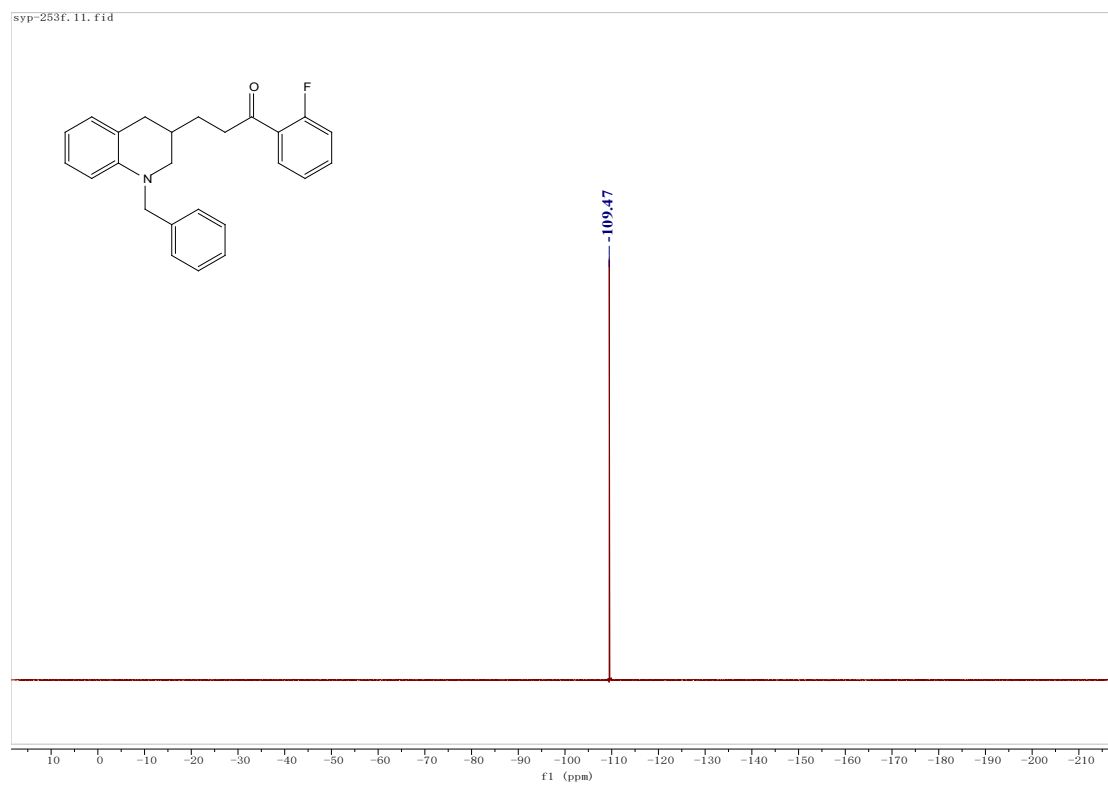



### <sup>1</sup>H-NMR spectrum of C<sub>30</sub>

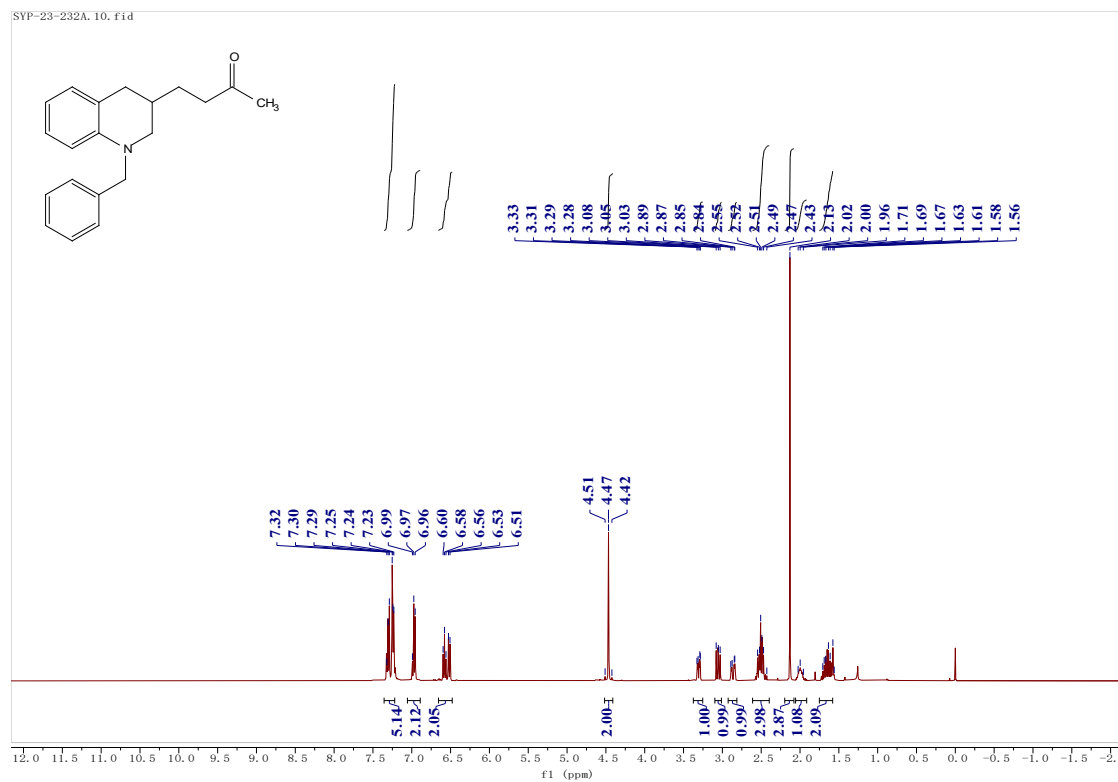

### <sup>13</sup>C-NMR spectrum of C<sub>30</sub>

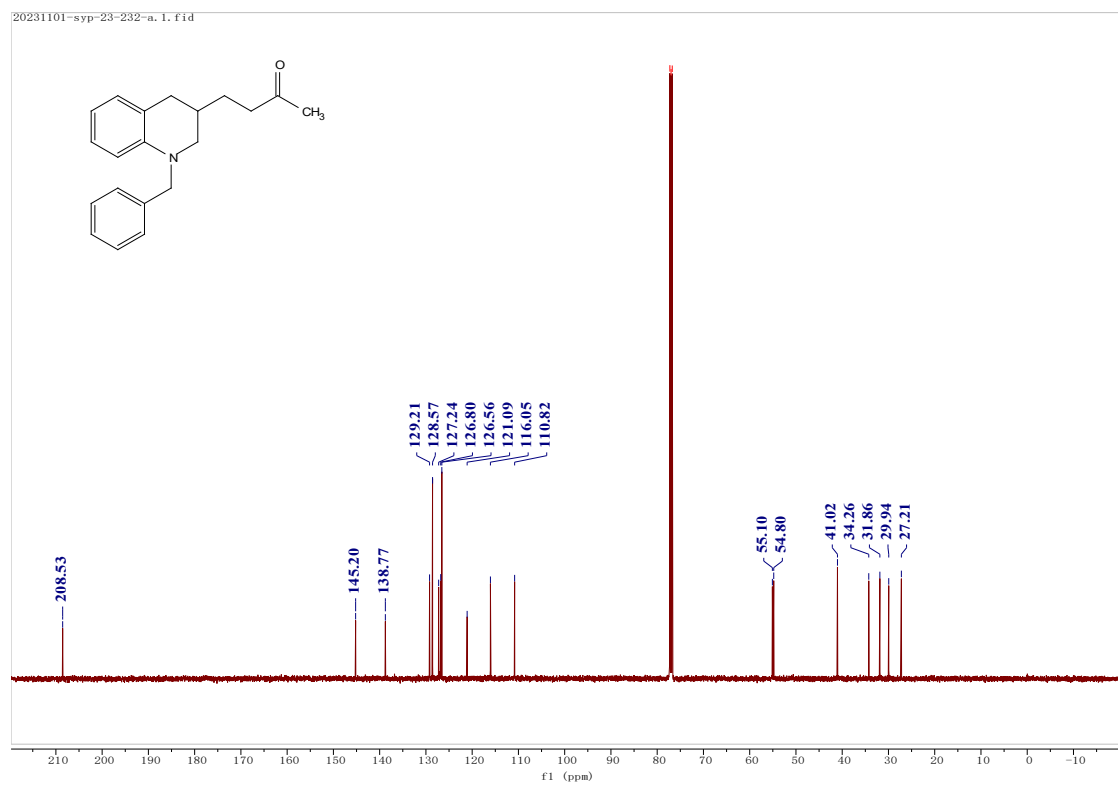

### <sup>1</sup>H-NMR spectrum of C<sub>31</sub>

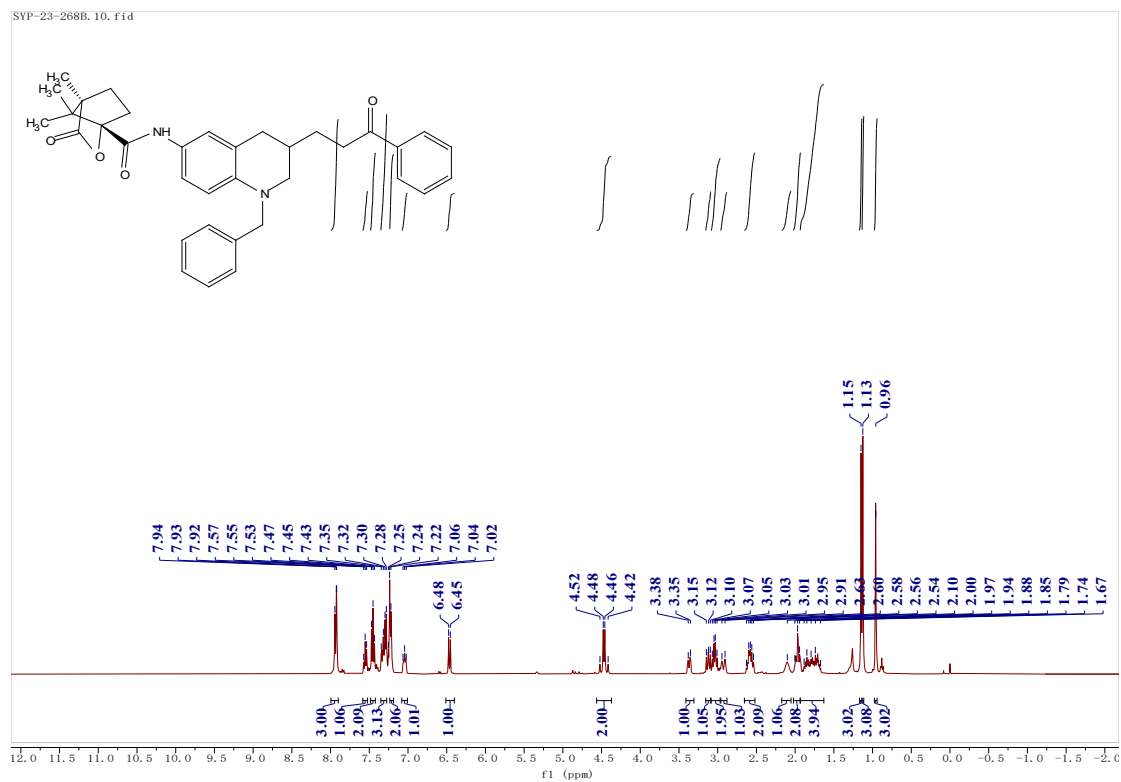

### <sup>13</sup>C-NMR spectrum of C<sub>31</sub>

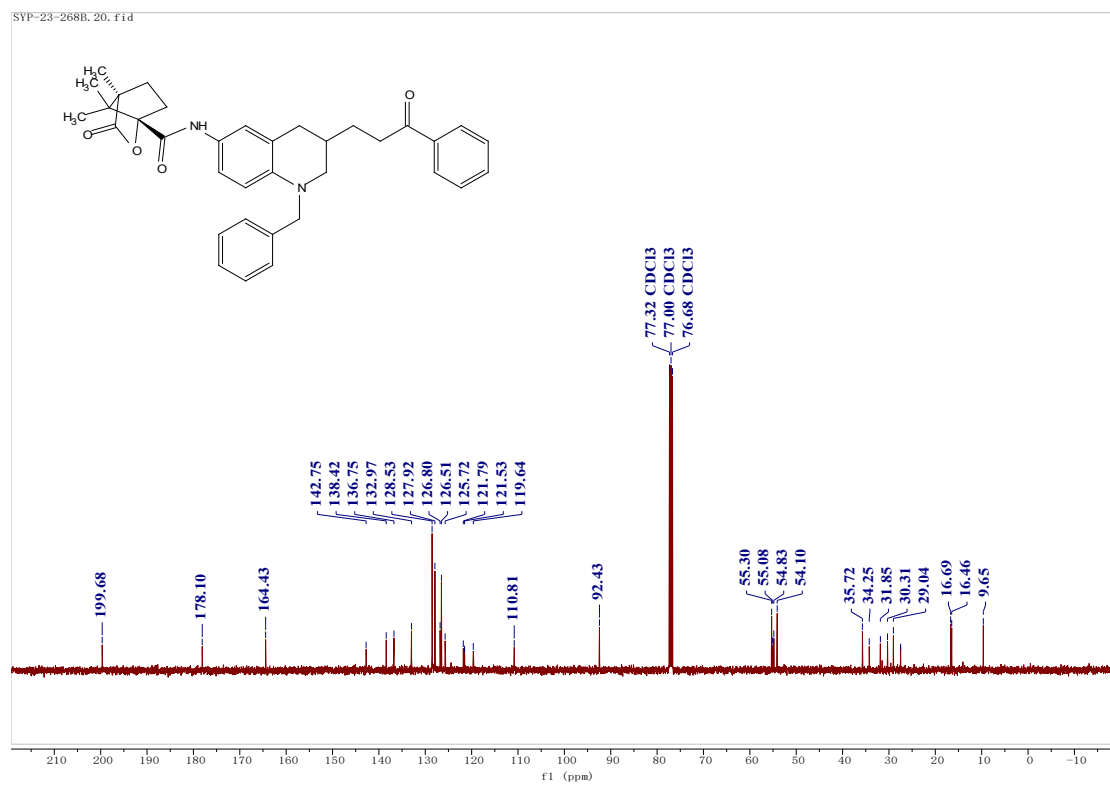

### <sup>1</sup>H-NMR spectrum of C<sub>32</sub>

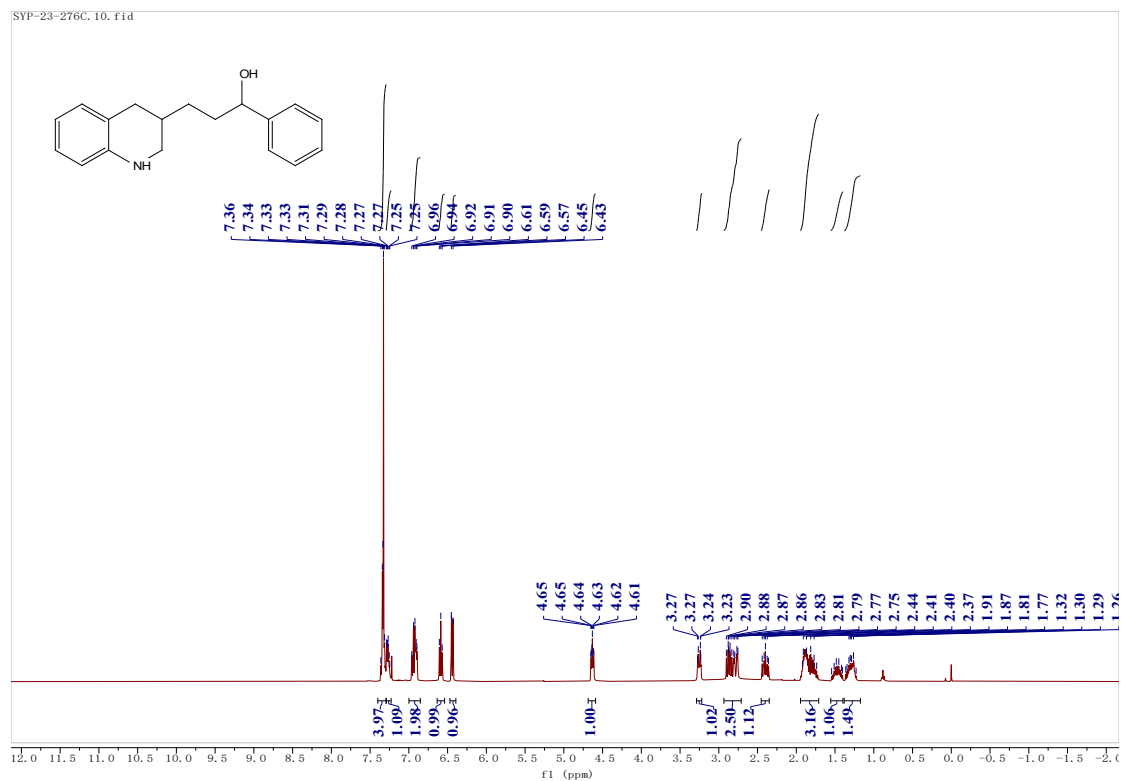

### <sup>13</sup>C-NMR spectrum of C<sub>32</sub>

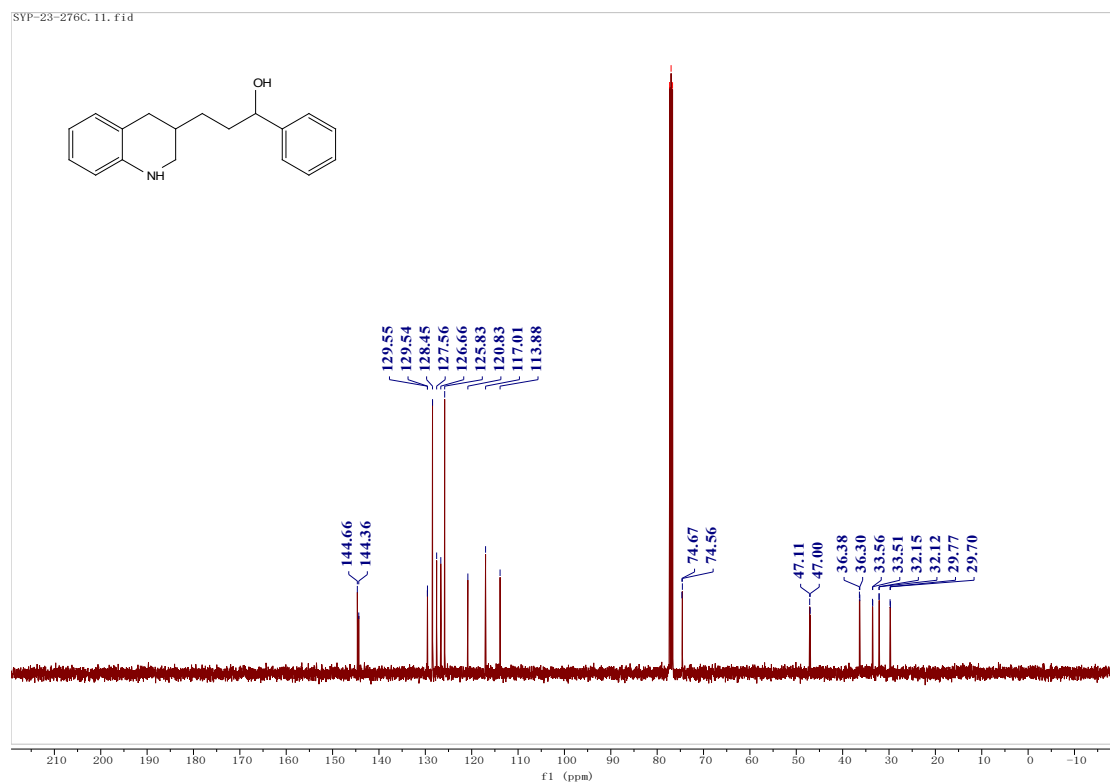

### <sup>1</sup>H-NMR spectrum of C<sub>33</sub>

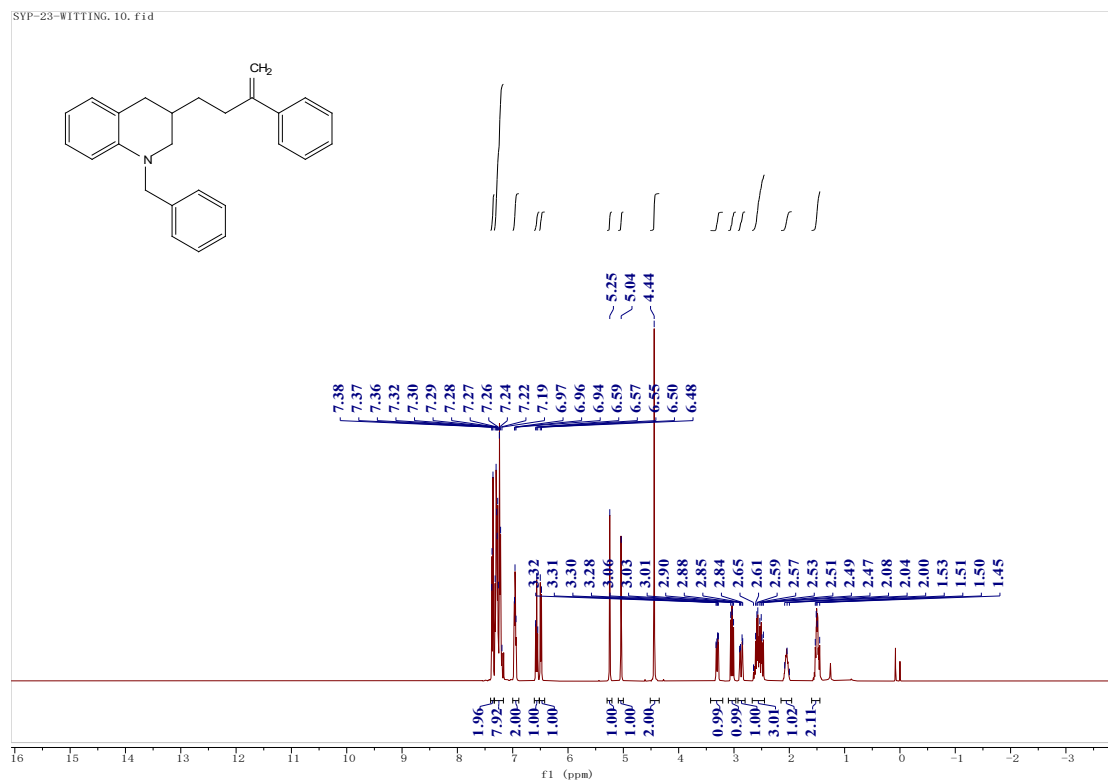

### <sup>13</sup>C-NMR spectrum of C<sub>33</sub>

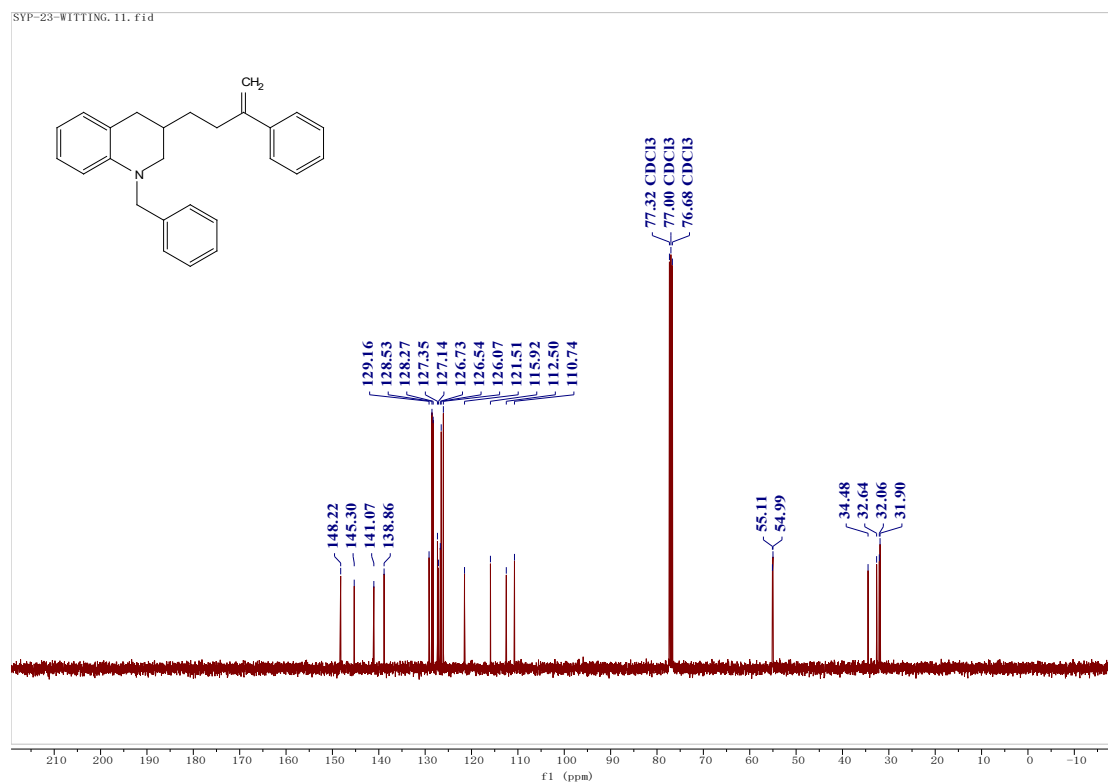

## References

- (1) Wang, M.; Zhang, M. Diastereoselective Construction of Carbo-Bridged Polyheterocycles by a Three-component Tandem Annulation Reaction. *Org. Bio. Chem.* **2023**, *21*, 6342–6347.
- (2) Yang, J.; Zhao, H.; Tan, Z.; Cao, L.; Jiang, H.; Ci, C.; Dixneuf, P. H.; Zhang, M. syn-Selective Construction of Fused Heterocycles by Catalytic Reductive Tandem Functionalization of *N*-Heteroarenes. *ACS Catal.* **2021**, *11*, 9271–9278.
